# Supplementary material for: Recombination-independent rapid convergent evolution of the gastric pathogen Helicobacter pylori
Source: PubMed Central journal article supplement (PMC6249973; doi:10.1186/s12864-018-5231-7), 2018-11-21
Supplement: 12864_2018_5231_MOESM1_ESM.pdf [file 12864_2018_5231_MOESM1_ESM.pdf]

**Table S1.** Comparison of nucleotide diversity in core genes and homoplasy in the encoded proteins of analyzed ‘Global’ subset of *H. pylori* with 5 other global subsets based on random selection of 12 non-Amerindian strains in our dataset. The mean values are denoted in percentages along with their standard error values.

|                                                                                                  | ‘Global’ subset<br>(12 strains) | SET 1        | SET 2        | SET 3        | SET 4        | SET 5          |
|--------------------------------------------------------------------------------------------------|---------------------------------|--------------|--------------|--------------|--------------|----------------|
| core genes analyzed                                                                              | 1200                            | 941          | 984          | 926          | 936          | 988            |
| diversity, $\pi$                                                                                 | 4.21±0.03 %                     | 4.10±0.04 %  | 4.08±0.03 %  | 4.12±0.04 %  | 4.13±0.03 %  | 3.84±0.03 %    |
| dN                                                                                               | 1.74±0.04 %                     | 1.49±0.03 %  | 1.46±0.03 %  | 1.47±0.03 %  | 1.49±0.03 %  | 1.37±0.03 %    |
| dS                                                                                               | 15.23±0.13 %                    | 15.47±0.12 % | 15.52±0.11 % | 15.68±0.12 % | 15.77±0.11 % | 14.48±0.11     |
| genes showing<br>homoplasy in encoded<br>proteins                                                | 1126                            | 846          | 891          | 832          | 826          | 886            |
| amino acid positions<br>with repeated changes                                                    | 5.10±0.11 %                     | 4.36±0.09 %  | 4.24±0.09 %  | 4.48±0.12 %  | 3.97±0.09 %  | 4.43±0.10 %    |
| recombinant genes                                                                                | 490                             | 344          | 357          | 345          | 291          | 415            |
| amino acid positions<br>with repeated changes<br>in encoded proteins of<br>recombinant genes     | 6.02±0.18 %                     | 5.08±0.16 %  | 4.82±0.15 %  | 5.04±0.15 %  | 4.73±0.16 %  | 5.04±0.15<br>% |
| non-recombinant genes                                                                            | 710                             | 597          | 627          | 581          | 645          | 573            |
| amino acid positions<br>with repeated changes<br>in encoded proteins of<br>non-recombinant genes | 4.40±0.13 %                     | 3.34±0.10 %  | 3.38±0.10 %  | 3.52±0.16 %  | 3.07±0.09 %  | 3.27±0.12 %    |

**Table S2.** Results of 95% significance level (based on a parametric bootstrap with  $B = 500$ ) of synonymous and non-synonymous synDss statistics for 50 randomly selected core genes of *H. pylori* – 25 recombinant and 25 non-recombinant as defined using PhiPack analysis.

| Gene                                                                         | Product                                                                                | Protein-length<br>(amino acid) | Synonymous<br>Dss | Non-synonymous<br>Dss | Possible<br>indication        |
|------------------------------------------------------------------------------|----------------------------------------------------------------------------------------|--------------------------------|-------------------|-----------------------|-------------------------------|
| 25 randomly selected core genes designated as <b>recombinants</b> by PhiPack |                                                                                        |                                |                   |                       |                               |
| <i>HP_0029</i>                                                               | dethiobiotin synthetase ( <i>bioD</i> )                                                | 218                            | no                | no                    | neither                       |
| <i>HP_0042</i>                                                               | <i>trbI</i> protein                                                                    | 233                            | yes               | no                    | synonymous<br>convergence     |
| <i>HP_0102</i>                                                               | conserved hypothetical protein                                                         | 259                            | no                | yes                   | non-synonymous<br>convergence |
| <i>HP_0150</i>                                                               | predicted coding region<br>HP0150                                                      | 196                            | no                | yes                   | non-synonymous<br>convergence |
| <i>HP_0214</i>                                                               | sodium-dependent transporter<br>( <i>huNaDC-1</i> )                                    | 552                            | no                | yes                   | non-synonymous<br>convergence |
| <i>HP_0298</i>                                                               | dipeptide ABC transporter,<br>periplasmic dipeptide-binding<br>protein ( <i>dppA</i> ) | 549                            | yes               | yes                   | recombination                 |
| <i>HP_0352</i>                                                               | flagellar motor switch protein<br>( <i>fliG</i> )                                      | 343                            | no                | yes                   | non-synonymous<br>convergence |

|                |                                                                   |     |     |     |                            |
|----------------|-------------------------------------------------------------------|-----|-----|-----|----------------------------|
| <i>HP_0393</i> | chemotaxis protein ( <i>cheV</i> )                                | 311 | no  | no  | neither                    |
| <i>HP_0493</i> | phospho-N-acetylmuramoyl-pentapeptide-transferase ( <i>mraY</i> ) | 353 | no  | yes | non-synonymous convergence |
| <i>HP_0563</i> | predicted coding region<br>HP0563                                 | 416 | yes | yes | recombination              |
| <i>HP_0603</i> | predicted coding region<br>HP0603                                 | 189 | no  | yes | non-synonymous convergence |
| <i>HP_0630</i> | modulator of drug activity ( <i>mda66</i> )                       | 194 | yes | yes | recombination              |
| <i>HP_0683</i> | UDP-N-acetylglucosamine pyrophosphorylase( <i>glmU</i> )          | 433 | yes | yes | recombination              |
| <i>HP_0747</i> | conserved hypothetical protein                                    | 393 | no  | no  | neither                    |
| <i>HP_0865</i> | deoxyuridine 5'-triphosphate nucleotidohydrolase( <i>dut</i> )    | 145 | no  | no  | neither                    |
| <i>HP_0959</i> | conserved hypothetical protein                                    | 243 | no  | yes | non-synonymous convergence |
| <i>HP_1014</i> | 7-alpha-hydroxysteroid dehydrogenase ( <i>hdhA</i> )              | 262 | no  | no  | neither                    |
| <i>HP_1029</i> | predicted coding region<br>HP1029                                 | 178 | no  | yes | non-synonymous convergence |
| <i>HP_1055</i> | predicted coding region<br>HP1055                                 | 314 | yes | yes | recombination              |

|                                                                                  |                                                          |     |     |     |                            |
|----------------------------------------------------------------------------------|----------------------------------------------------------|-----|-----|-----|----------------------------|
| <i>HP_1112</i>                                                                   | adenylosuccinate lyase ( <i>purB</i> )                   | 440 | no  | no  | neither                    |
| <i>HP_1121</i>                                                                   | cytosine specific DNA methyltransferase(BSP6IM)          | 312 | no  | no  | neither                    |
| <i>HP_1232</i>                                                                   | dihydropteroate synthase (folP)                          | 380 | yes | yes | recombination              |
| <i>HP_1268</i>                                                                   | NADH-ubiquinone oxidoreductase, NQO9 subunit(NQO9)       | 220 | no  | no  | neither                    |
| <i>HP_1508</i>                                                                   | ferredoxin-like protein                                  | 458 | no  | yes | non-synonymous convergence |
| <i>HP_1529</i>                                                                   | chromosomal replication initiator protein( <i>dnaA</i> ) | 457 | no  | yes | non-synonymous convergence |
| 25 randomly selected core genes designated as <b>non-recombinants</b> by PhiPack |                                                          |     |     |     |                            |
| <i>HP_0020</i>                                                                   | carboxynorspermidine decarboxylase ( <i>nspC</i> )       | 405 | no  | no  | neither                    |
| <i>HP_0124</i>                                                                   | translation initiation factor IF-3 ( <i>infC</i> )       | 203 | yes | no  | synonymous convergence     |
| <i>HP_0146</i>                                                                   | cbb3-type cytochrome c oxidase subunit Q ( <i>ccoQ</i> ) | 73  | no  | no  | neither                    |
| <i>HP_0192</i>                                                                   | fumarate reductase, flavoprotein subunit ( <i>frdA</i> ) | 714 | yes | no  | synonymous convergence     |

|                |                                                            |     |     |     |                            |
|----------------|------------------------------------------------------------|-----|-----|-----|----------------------------|
| <i>HP_0232</i> | secreted protein involved in flagellar motility            | 215 | no  | yes | non-synonymous convergence |
| <i>HP_0274</i> | conserved hypothetical protein                             | 132 | no  | no  | neither                    |
| <i>HP_0299</i> | dipeptide ABC transporter, permease protein( <i>dppB</i> ) | 334 | no  | no  | neither                    |
| <i>HP_0380</i> | glutamate dehydrogenase ( <i>gdhA</i> )                    | 448 | yes | no  | synonymous convergence     |
| <i>HP_0420</i> | predicted coding region HP0420                             | 142 | no  | no  | neither                    |
| <i>HP_0736</i> | phosphoserine aminotransferase ( <i>serC</i> )             | 369 | no  | no  | neither                    |
| <i>HP_0742</i> | phosphoribosylpyrophosphate synthetase ( <i>prsA</i> )     | 318 | no  | yes | non-synonymous convergence |
| <i>HP_0771</i> | predicted coding region HP0771                             | 245 | no  | no  | neither                    |
| <i>HP_0884</i> | predicted coding region HP0884                             | 614 | no  | yes | non-synonymous convergence |
| <i>HP_0908</i> | flagellar hook ( <i>flgE</i> )                             | 605 | no  | no  | neither                    |
| <i>HP_0933</i> | predicted coding region HP0933                             | 200 | no  | yes | non-synonymous convergence |
| <i>HP_0950</i> | acetyl-CoA carboxylase beta subunit ( <i>accD</i> )        | 289 | no  | no  | neither                    |

|                |                                                             |     |    |     |                               |
|----------------|-------------------------------------------------------------|-----|----|-----|-------------------------------|
| <i>HP_0958</i> | predicted coding region<br>HP0958                           | 254 | no | no  | neither                       |
| <i>HP_1016</i> | phosphatidylglycerophosphate<br>synthase ( <i>pgsA</i> )    | 200 | no | yes | non-synonymous<br>convergence |
| <i>HP_1050</i> | homoserine kinase ( <i>thrB</i> )                           | 293 | no | no  | neither                       |
| <i>HP_1190</i> | histidyl-tRNA synthetase<br>( <i>hisS</i> )                 | 442 | no | yes | non-synonymous<br>convergence |
| <i>HP_1203</i> | transcription termination factor<br>NusG ( <i>nusG</i> )    | 176 | no | no  | neither                       |
| <i>HP_1269</i> | NADH-ubiquinone<br>oxidoreductase, NQO10<br>subunit (NQO10) | 182 | no | no  | neither                       |
| <i>HP_1299</i> | methionine amino peptidase<br>( <i>map</i> )                | 253 | no | yes | non-synonymous<br>convergence |
| <i>HP_1305</i> | ribosomal protein S8 ( <i>rps8</i> )                        | 131 | no | no  | neither                       |
| <i>HP_1559</i> | flagellar basal-body rod protein<br>( <i>flgB</i> )         | 140 | no | no  | neither                       |

**Table S3.** List of 487 non-recombinant core genes under positive selection for accumulating convergent amino acid mutations in the encoded proteins. The genes with ‘\*’ and ‘+’ denote the positively selected genes as detected by Montano et al. [26] and Yahara et al. [45] respectively.

| <b>Gene</b>    | <b>GI</b> | <b>CDS-region</b> | <b>Product</b>                                                | <b>Protein Length (AA)</b> |
|----------------|-----------|-------------------|---------------------------------------------------------------|----------------------------|
| <i>HP_0001</i> | 2313078   | 220-633           | predicted coding region HP0001                                | 138                        |
| <i>HP_0002</i> | 2313079   | 638-1105          | riboflavin synthase beta chain (ribE)                         | 156                        |
| <i>HP_0003</i> | 2313080   | 1118-1945         | 3-deoxy-d-manno-octulosonic acid 8-phosphatesynthetase (kdsA) | 276                        |
| <i>HP_0005</i> | 2313082   | 2719-3399         | orotidine 5'-phosphate decarboxylase (pyrF)                   | 227                        |
| <i>HP_0010</i> | 2313084   | 7606-9243         | chaperone and heat shock protein (groEL)                      | 546                        |
| <i>HP_0011</i> | 2313085   | 9271-9624         | co-chaperone (groES)                                          | 118                        |
| <i>HP_0015</i> | 2313096   | 13702-13980       | predicted coding region HP0015                                | 93                         |
| <i>HP_0016</i> | 2313097   | 13983-14243       | predicted coding region HP0016                                | 87                         |
| <i>HP_0019</i> | 2313092   | 18380-19342       | chemotaxis protein (cheV)                                     | 321                        |
| <i>HP_0020</i> | 2313093   | 19342-20556       | carboxynorspermidine decarboxylase (nspC)                     | 405                        |
| <i>HP_0031</i> | 2313114   | 31961-32371       | predicted coding region HP0031                                | 137                        |
| <i>HP_0034</i> | 2313109   | 34895-35245       | aspartate 1-decarboxylase (panD)                              | 117                        |
| <i>HP_0035</i> | 2313110   | 35251-35541       | conserved hypothetical protein                                | 97                         |
| <i>HP_0039</i> | 2313126   | 38472-38741       | predicted coding region HP0039                                | 90                         |
| <i>HP_0044</i> | 2313119   | 42105-43247       | GDP-D-mannose dehydratase (rfbD)                              | 381                        |
| <i>HP_0045</i> | 2313120   | 43243-44172       | nodulation protein (nolK)                                     | 310                        |

|                  |         |               |                                                               |     |
|------------------|---------|---------------|---------------------------------------------------------------|-----|
| <i>HP_0049</i>   | 2313129 | 48294-49283   | predicted coding region HP0049                                | 330 |
| <i>HP_0055</i>   | 2313133 | 56227-57714   | proline permease (putP)                                       | 496 |
| <i>HP_0068</i>   | 2313140 | 72821-73417   | urease accessory protein (ureG)                               | 199 |
| <i>HP_0069</i>   | 2313141 | 73449-74210   | urease accessory protein (ureF)                               | 254 |
| <i>HP_0072</i>   | 2313153 | 75530-77236   | urease beta subunit (urea<br>amidohydrolase)(ureB)            | 569 |
| <i>HP_0073</i>   | 2313154 | 77243-77956   | urease alpha subunit (ureA)<br>(ureaamidohydrolase)           | 238 |
| <i>HP_0074</i>   | 2313155 | 78305-78775   | lipoprotein signal peptidase (lspA)                           | 157 |
| <i>HP_0075</i>   | 2313156 | 78772-80106   | urease protein (ureC)                                         | 445 |
| <i>HP_0076</i>   | 2313157 | 80196-80462   | ribosomal protein S20 (rps20)                                 | 89  |
| <i>HP_0083</i>   | 2313164 | 88836-89222   | ribosomal protein S9 (rps9)                                   | 129 |
| <i>HP_0084</i>   | 2313165 | 89222-89644   | ribosomal protein L13 (rpl13)                                 | 141 |
| <i>HP_0085</i>   | 2313172 | 89960-90145   | predicted coding region HP0085                                | 62  |
| <i>HP_0089</i>   | 2313168 | 95194-95886   | pfs protein (pfs)                                             | 231 |
| * <i>HP_0090</i> | 2313169 | 95900-96826   | malonyl coenzyme A-acyl carrier<br>proteintransacylase (fabD) | 309 |
| <i>HP_0093</i>   | 4580425 | 98939-99376   | predicted coding region HP0093                                | 146 |
| <i>HP_0095</i>   | 2313182 | 99942-100469  | predicted coding region HP0095                                | 176 |
| <i>HP_0105</i>   | 2313188 | 112831-113295 | conserved hypothetical protein                                | 155 |
| <i>HP_0107</i>   | 2313190 | 114503-115420 | cysteine synthetase (cysK)                                    | 306 |
| <i>HP_0109</i>   | 2313191 | 116365-118224 | chaperone and heat shock protein 70 (dnaK)                    | 620 |
| <i>HP_0110</i>   | 2313192 | 118257-118823 | co-chaperone and heat shock protein (grpE)                    | 189 |
| <i>HP_0112</i>   | 2313200 | 119980-120672 | predicted coding region HP0112                                | 231 |
| <i>HP_0114</i>   | 2313202 | 121005-122888 | predicted coding region HP0114                                | 628 |



|                  |         |               |                                                              |     |
|------------------|---------|---------------|--------------------------------------------------------------|-----|
| <i>HP_0115</i>   | 2313197 | 122951-124492 | flagellin B (flaB)                                           | 514 |
| <i>HP_0116</i>   | 2313198 | 124658-126865 | DNA topoisomerase I (topA)                                   | 736 |
| * <i>HP_0123</i> | 2313207 | 135142-136977 | threonyl-tRNA synthetase (thrS)                              | 612 |
| <i>HP_0124</i>   | 2313208 | 136977-137585 | translation initiation factor IF-3 (infC)                    | 203 |
| <i>HP_0125</i>   | 2313210 | 137569-137760 | ribosomal protein L35 (rpl35)                                | 64  |
| <i>HP_0126</i>   | 2313209 | 137857-138204 | ribosomal protein L20 (rpl20)                                | 116 |
| <i>HP_0127</i>   | 2313212 | 138407-139264 | outer membrane protein (omp4)                                | 286 |
| * <i>HP_0133</i> | 2313219 | 143597-144835 | serine transporter (sdaC)                                    | 413 |
| <i>HP_0135</i>   | 2313228 | 146444-146575 | predicted coding region HP0135                               | 44  |
| <i>HP_0136</i>   | 2313221 | 146816-147271 | bacterioferritin comigratory protein (bcp)                   | 152 |
| <i>HP_0137</i>   | 2313227 | 147284-147916 | predicted coding region HP0137                               | 211 |
| <i>HP_0139</i>   | 2313223 | 149386-150111 | conserved hypothetical secreted protein                      | 242 |
| <i>HP_0145</i>   | 2313232 | 157813-158508 | cytochrome c oxidase, monoheme subunit,membrane-bound (fixO) | 232 |
| <i>HP_0146</i>   | 2313239 | 158519-158737 | cbb3-type cytochrome c oxidase subunit Q (CcoQ)              | 73  |
| <i>HP_0147</i>   | 2313233 | 158742-159599 | cytochrome c oxidase, diheme subunit,membrane-bound (fixP)   | 286 |
| <i>HP_0148</i>   | 2313246 | 159630-159833 | predicted coding region HP0148                               | 68  |
| <i>HP_0155</i>   | 2313243 | 165256-165528 | predicted coding region HP0155                               | 91  |
| <i>HP_0156</i>   | 2313244 | 165543-166142 | predicted coding region HP0156                               | 200 |
| <i>HP_0157</i>   | 2313237 | 166150-166635 | shikimic acid kinase I (aroK)                                | 162 |
| <i>HP_0158</i>   | 2313245 | 166660-167613 | predicted coding region HP0158                               | 318 |
| <i>HP_0162</i>   | 2313249 | 170707-171426 | conserved hypothetical protein                               | 240 |
| <i>HP_0168</i>   | 2313259 | 175146-175406 | predicted coding region HP0168                               | 87  |

|                  |         |               |                                                                   |     |
|------------------|---------|---------------|-------------------------------------------------------------------|-----|
| <i>HP_0176</i>   | 2313265 | 182781-183701 | fructose-bisphosphate aldolase (tsr)                              | 307 |
| <i>HP_0177</i>   | 2313266 | 183726-184286 | translation elongation factor EF-P (efp)                          | 187 |
| <i>HP_0182</i>   | 2313270 | 188681-190183 | lysyl-tRNA synthetase (lysS)                                      | 501 |
| <i>HP_0191</i>   | 2313278 | 197129-197863 | fumarate reductase, iron-sulfur subunit (frdB)                    | 245 |
| * <i>HP_0192</i> | 2313279 | 197859-200000 | fumarate reductase, flavoprotein subunit (frdA)                   | 714 |
| <i>HP_0193</i>   | 2313280 | 200013-200777 | fumarate reductase, cytochrome b subunit (frdC)                   | 255 |
| <i>HP_0194</i>   | 2313281 | 200992-201693 | triosephosphate isomerase (tpi)                                   | 234 |
| <i>HP_0196</i>   | 2313283 | 202543-203550 | UDP-3-O-(3-hydroxymyristoyl) glucosamineN-acyltransferase (lpxD)  | 336 |
| <i>HP_0197</i>   | 2313288 | 203618-204772 | S-adenosylmethionine synthetase 2 (metX)                          | 385 |
| <i>HP_0198</i>   | 2313289 | 204842-205252 | nucleoside diphosphate kinase (ndk)                               | 137 |
| <i>HP_0199</i>   | 2313294 | 205281-205634 | predicted coding region HP0199                                    | 118 |
| <i>HP_0201</i>   | 2313290 | 205874-206887 | fatty acid/phospholipid synthesis protein(plsX)                   | 338 |
| <i>HP_0202</i>   | 2313291 | 206915-207907 | beta-ketoacyl-acyl carrier protein synthase III(fabH)             | 331 |
| <i>HP_0215</i>   | 2313305 | 223891-224688 | CDP-diglyceride synthetase (cdsA)                                 | 266 |
| <i>HP_0220</i>   | 2313311 | 228339-229499 | synthesis of [Fe-S] cluster (nifS)                                | 387 |
| <i>HP_0223</i>   | 2313313 | 230973-232340 | ATP-dependent protease (sms)                                      | 456 |
| <i>HP_0226</i>   | 2313315 | 233932-234762 | conserved hypothetical integral membraneprotein                   | 277 |
| <i>HP_0230</i>   | 2313323 | 240357-241085 | CTP:CMP-3-deoxy-D-manno-octulosonate-cytidylyl-transferase (kdsB) | 243 |
| <i>HP_0232</i>   | 2313324 | 242006-242650 | secreted protein involved in flagellar motility                   | 215 |
| <i>HP_0234</i>   | 2313326 | 243849-244376 | conserved hypothetical integral                                   | 176 |

|                  |         |               |                                                           |     |
|------------------|---------|---------------|-----------------------------------------------------------|-----|
|                  |         |               | membraneprotein                                           |     |
| <i>HP_0241</i>   | 2313335 | 251582-251974 | predicted coding region HP0241                            | 131 |
| <i>HP_0242</i>   | 2313336 | 251970-252251 | predicted coding region HP0242                            | 94  |
| <i>HP_0243</i>   | 2313332 | 252275-252706 | neutrophil activating protein<br>(napA)(bacterioferritin) | 144 |
| <i>HP_0245</i>   | 2313346 | 254057-254371 | predicted coding region HP0245                            | 105 |
| <i>HP_0248</i>   | 2313341 | 257084-258169 | conserved hypothetical protein                            | 362 |
| * <i>HP_0249</i> | 2313347 | 258179-258715 | predicted coding region HP0249                            | 179 |
| <i>HP_0251</i>   | 2313343 | 260364-261377 | oligopeptide ABC transporter, permease<br>protein(oppC)   | 338 |
| * <i>HP_0255</i> | 2313350 | 264709-265941 | adenylosuccinate synthetase (purA)                        | 411 |
| <i>HP_0256</i>   | 2313360 | 265941-266366 | predicted coding region HP0256                            | 142 |
| <i>HP_0265</i>   | 2313357 | 275250-275969 | cytochrome c biogenesis protein (ccdA)                    | 240 |
| <i>HP_0266</i>   | 2313358 | 275982-277115 | dihydroorotase (pyrC)                                     | 378 |
| * <i>HP_0267</i> | 2313359 | 277103-278329 | chlorohydrolase                                           | 409 |
| <i>HP_0268</i>   | 2313371 | 278393-278632 | predicted coding region HP0268                            | 80  |
| <i>HP_0270</i>   | 2313372 | 280163-280648 | predicted coding region HP0270                            | 162 |
| <i>HP_0272</i>   | 2313374 | 281617-282147 | predicted coding region HP0272                            | 177 |
| <i>HP_0274</i>   | 2313365 | 282703-283098 | conserved hypothetical protein                            | 132 |
| <i>HP_0277</i>   | 2313367 | 285032-285283 | ferredoxin                                                | 84  |
| <i>HP_0280</i>   | 2313370 | 287766-288749 | heat shock protein B (ibpB)                               | 328 |
| <i>HP_0282</i>   | 2313386 | 290018-291457 | predicted coding region HP0282                            | 480 |
| * <i>HP_0285</i> | 2313381 | 294055-295308 | conserved hypothetical protein                            | 418 |
| <i>HP_0287</i>   | 2313387 | 296953-297468 | predicted coding region HP0287                            | 172 |
| <i>HP_0291</i>   | 2313389 | 307975-308262 | predicted coding region HP0291                            | 96  |

|                  |         |               |                                                      |     |
|------------------|---------|---------------|------------------------------------------------------|-----|
| <i>HP_0295</i>   | 2313393 | 312148-314631 | flagellin B homolog (fla)                            | 828 |
| <i>HP_0296</i>   | 2313394 | 314873-315184 | ribosomal protein L21 (rpl21)                        | 104 |
| <i>HP_0297</i>   | 2313395 | 315202-315465 | ribosomal protein L27 (rpl27)                        | 88  |
| <i>HP_0299</i>   | 2313397 | 317245-318246 | dipeptide ABC transporter, permease protein(dppB)    | 334 |
| <i>HP_0300</i>   | 2313398 | 318249-319103 | dipeptide ABC transporter, permease protein(dppC)    | 285 |
| <i>HP_0302</i>   | 2313400 | 319978-320781 | dipeptide ABC transporter, ATP-binding protein(dppF) | 268 |
| <i>HP_0306</i>   | 2313404 | 323725-325014 | glutamate-1-semialdehyde 2,1-aminomutase (hemL)      | 430 |
| <i>HP_0307</i>   | 2313412 | 325014-325283 | predicted coding region HP0307                       | 90  |
| <i>HP_0308</i>   | 2313413 | 325302-325703 | predicted coding region HP0308                       | 134 |
| <i>HP_0313</i>   | 2313408 | 328950-330092 | nitrite extrusion protein (narK)                     | 381 |
| <i>HP_0318</i>   | 2313418 | 334391-335143 | conserved hypothetical protein                       | 251 |
| <i>HP_0319</i>   | 2313419 | 335207-336829 | arginyl-tRNA synthetase (argS)                       | 541 |
| <i>HP_0320</i>   | 2313428 | 336835-337071 | conserved hypothetical secreted protein              | 79  |
| <i>HP_0321</i>   | 2313420 | 337146-337763 | 5'-guanylate kinase (gmk)                            | 206 |
| <i>HP_0323</i>   | 2313422 | 339415-339954 | membrane bound endonuclease (nuc)                    | 180 |
| <i>HP_0325</i>   | 2313423 | 340832-341542 | flagellar basal-body L-ring protein (flgH)           | 237 |
| <i>HP_0327</i>   | 2313425 | 343113-343652 | flagellar protein G (flaG)                           | 180 |
| <i>HP_0330</i>   | 2313431 | 345554-346543 | ketol-acid reductoisomerase (ilvC)                   | 330 |
| <i>HP_0332</i>   | 2313433 | 347374-347604 | cell division topological specificity factor(minE)   | 77  |
| <i>HP_0333</i>   | 2313434 | 347607-348416 | DNA processing chain A (dprA)                        | 270 |
| * <i>HP_0349</i> | 2313438 | 356453-358066 | CTP synthetase (pyrG)                                | 538 |

|                  |         |               |                                                             |     |
|------------------|---------|---------------|-------------------------------------------------------------|-----|
| <i>HP_0353</i>   | 2313454 | 361777-362550 | flagellar export protein (fliH)                             | 258 |
| <i>HP_0354</i>   | 2313455 | 362550-364403 | deoxyxylulose-5-phosphate synthase,<br>putative(dxs)        | 618 |
| <i>HP_0355</i>   | 2313456 | 364403-366208 | GTP-binding membrane protein (lepA)                         | 602 |
| <i>HP_0363</i>   | 2313465 | 372968-373594 | L-isoaspartyl-protein carboxyl<br>methyltransferase(pcm)    | 209 |
| <i>HP_0364</i>   | 2313466 | 373607-374629 | ribonucleoside diphosphate reductase,<br>betasubunit (nrdB) | 341 |
| <i>HP_0371</i>   | 2313469 | 379643-380110 | biotin carboxyl carrier protein (fabE)                      | 156 |
| <i>HP_0372</i>   | 2313476 | 380234-380803 | deoxycytidine triphosphate deaminase (dcd)                  | 190 |
| <i>HP_0375</i>   | 2313484 | 383775-384203 | predicted coding region HP0375                              | 143 |
| <i>HP_0376</i>   | 2313479 | 384259-385260 | ferrochelatase (hemH)                                       | 334 |
| <i>HP_0378</i>   | 2313481 | 386015-388822 | cytochrome c biogenesis protein (ycf5)                      | 936 |
| <i>HP_0380</i>   | 2313483 | 390128-391471 | glutamate dehydrogenase (gdhA)                              | 448 |
| * <i>HP_0381</i> | 2313486 | 391540-392367 | protoporphyrinogen oxidase (hemK)                           | 276 |
| <i>HP_0385</i>   | 2313501 | 395289-395516 | predicted coding region HP0385                              | 76  |
| <i>HP_0386</i>   | 2313504 | 395532-395765 | predicted coding region HP0386                              | 78  |
| * <i>HP_0388</i> | 2313489 | 397649-398377 | conserved hypothetical protein                              | 243 |
| <i>HP_0389</i>   | 2313490 | 398435-399073 | superoxide dismutase (sodB)                                 | 213 |
| <i>HP_0390</i>   | 2313491 | 399297-399794 | adhesin-thiol peroxidase (tagD)                             | 166 |
| <i>HP_0391</i>   | 2313492 | 400055-400549 | purine-binding chemotaxis protein (cheW)                    | 165 |
| * <i>HP_0397</i> | 2313497 | 407267-408838 | phosphoglycerate dehydrogenase (serA)                       | 524 |
| <i>HP_0399</i>   | 2313498 | 409434-411101 | ribosomal protein S1 (rps1)                                 | 556 |
| <i>HP_0403</i>   | 2313509 | 415638-416621 | phenylalanyl-tRNA synthetase, alpha<br>subunit(pheS)        | 328 |

|                              |         |               |                                                              |     |
|------------------------------|---------|---------------|--------------------------------------------------------------|-----|
| <i>HP_0404</i>               | 2313510 | 416702-417013 | protein kinase C inhibitor (SP:P16436)                       | 104 |
| <i>HP_0406</i>               | 2313513 | 418383-418970 | predicted coding region HP0406                               | 196 |
| <i>HP_0419</i>               | 2313522 | 433863-434645 | conserved hypothetical protein                               | 261 |
| <i>HP_0420</i>               | 2313528 | 434665-435090 | predicted coding region HP0420                               | 142 |
| <i>HP_0421</i>               | 2313523 | 435098-436264 | type 1 capsular polysaccharide biosynthesis protein J (capJ) | 389 |
| <i>HP_0466</i>               | 2313570 | 487913-488677 | conserved hypothetical protein                               | 255 |
| <i>HP_0467</i>               | 2313571 | 488690-489034 | conserved hypothetical integral membrane protein             | 115 |
| <i>HP_0470</i>               | 2313574 | 490978-492711 | oligoendopeptidase F (pepF)                                  | 578 |
| <sup>+</sup> <i>HP_0480</i>  | 2313589 | 502628-504424 | GTP-binding protein, fusA-homolog (yihK)                     | 599 |
| <i>HP_0485</i>               | 2313595 | 508125-509066 | catalase-like protein                                        | 314 |
| <i>HP_0491</i>               | 2313612 | 518288-518473 | ribosomal protein L28 (rpl28)                                | 62  |
| <sup>**</sup> <i>HP_0500</i> | 2313610 | 526549-527670 | DNA polymerase III beta-subunit (dnaN)                       | 374 |
| <i>HP_0514</i>               | 2313629 | 542010-542459 | ribosomal protein L9 (rpl9)                                  | 150 |
| <i>HP_0550</i>               | 2313666 | 585391-586704 | transcription termination factor Rho (rho)                   | 438 |
| <i>HP_0551</i>               | 2313667 | 586968-587168 | ribosomal protein L31 (rpl31)                                | 67  |
| <i>HP_0552</i>               | 2313668 | 587196-588056 | conserved hypothetical protein                               | 287 |
| <i>HP_0553</i>               | 2313669 | 588072-588752 | conserved hypothetical protein                               | 227 |
| <sup>*</sup> <i>HP_0557</i>  | 2313675 | 591533-592468 | acetyl-coenzyme A carboxylase (accA)                         | 312 |
| <sup>*</sup> <i>HP_0558</i>  | 2313676 | 592494-593729 | beta ketoacyl-acyl carrier protein synthase II (fabF)        | 412 |
| <i>HP_0559</i>               | 2313677 | 594040-594273 | acyl carrier protein (acpP)                                  | 78  |
| <i>HP_0562</i>               | 2313679 | 595292-595501 | ribosomal protein S21 (rps21)                                | 70  |
| <i>HP_0565</i>               | 2313680 | 597296-597940 | predicted coding region HP0565                               | 215 |

|                  |         |               |                                                    |     |
|------------------|---------|---------------|----------------------------------------------------|-----|
| <i>HP_0571</i>   | 2313691 | 603722-604297 | conserved hypothetical integral<br>membraneprotein | 192 |
| <i>HP_0572</i>   | 2313692 | 604315-604851 | adenine phosphoribosyltransferase (apt)            | 179 |
| <i>HP_0573</i>   | 2313701 | 604912-605241 | predicted coding region HP0573                     | 110 |
| <i>HP_0574</i>   | 2313693 | 605296-605748 | galactosidase acetyltransferase (lacA)             | 151 |
| <i>HP_0575</i>   | 2313694 | 605772-606467 | conserved hypothetical membrane protein            | 232 |
| <i>HP_0576</i>   | 2313695 | 606479-607348 | signal peptidase I (lepB)                          | 290 |
| <i>HP_0577</i>   | 2313696 | 607351-608226 | methylene-tetrahydrofolate dehydrogenase<br>(folD) | 292 |
| <i>HP_0581</i>   | 2313687 | 612000-613016 | dihydroorotase (pyrC)                              | 339 |
| <i>HP_0584</i>   | 2313688 | 614859-615227 | flagellar switch protein (fliN)                    | 123 |
| * <i>HP_0585</i> | 2313704 | 615312-615965 | endonuclease III (nth)                             | 218 |
| <i>HP_0588</i>   | 2313706 | 620219-620557 | ferredoxin-like protein                            | 113 |
| <i>HP_0590</i>   | 2313708 | 621689-622507 | ferredoxin oxidoreductase, beta subunit            | 273 |
| <i>HP_0591</i>   | 2313709 | 622510-623067 | ferredoxin oxidoreductase, gamma subunit           | 186 |
| <i>HP_0594</i>   | 2313720 | 628139-628300 | predicted coding region HP0594                     | 54  |
| <i>HP_0596</i>   | 2313719 | 630259-630834 | predicted coding region HP0596                     | 192 |
| <i>HP_0601</i>   | 2313722 | 637282-638811 | flagellin A (flaA)                                 | 510 |
| <i>HP_0602</i>   | 2313723 | 638932-639585 | endonuclease III                                   | 218 |
| <i>HP_0604</i>   | 2313724 | 640268-641287 | uroporphyrinogen decarboxylase (hemE)              | 340 |
| <i>HP_0616</i>   | 2313738 | 661117-662055 | chemotaxis protein (cheV)                          | 313 |
| * <i>HP_0618</i> | 2313740 | 663843-664415 | adenylate kinase (adk)                             | 191 |
| <i>HP_0620</i>   | 2313741 | 665747-666265 | inorganic pyrophosphatase (ppa)                    | 173 |
| <i>HP_0622</i>   | 2313746 | 668662-669021 | predicted coding region HP0622                     | 120 |
| * <i>HP_0623</i> | 2313743 | 669024-670370 | UDP-N-acetylmuramate-alanine ligase (murC)         | 449 |

|                  |         |               |                                                                     |     |
|------------------|---------|---------------|---------------------------------------------------------------------|-----|
| <i>* HP_0624</i> | 2313744 | 670366-671490 | solute-binding signature and mitochondrial signature protein (aspB) | 375 |
| <i>HP_0625</i>   | 2313753 | 671610-672686 | protein E (gcpE)                                                    | 359 |
| <i>HP_0626</i>   | 2313754 | 672692-673894 | tetrahydrodipicolinate N-succinyltransferase(dapD)                  | 401 |
| <i>HP_0627</i>   | 2313756 | 673909-674238 | predicted coding region HP0627                                      | 110 |
| <i>HP_0628</i>   | 2313757 | 674290-674964 | predicted coding region HP0628                                      | 225 |
| <i>HP_0634</i>   | 2313752 | 681542-682075 | quinone-reactive Ni/Fe hydrogenase (hydD)                           | 178 |
| <i>HP_0637</i>   | 2313773 | 684149-684598 | predicted coding region HP0637                                      | 150 |
| <i>HP_0639</i>   | 2313760 | 685737-686414 | conserved hypothetical protein                                      | 226 |
| <i>* HP_0640</i> | 2313761 | 686477-687682 | poly(A) polymerase (papS)                                           | 402 |
| <i>HP_0643</i>   | 2313763 | 688746-690062 | glutamyl-tRNA synthetase (gltX)                                     | 439 |
| <i>HP_0646</i>   | 2313766 | 692043-692861 | UDP-glucose pyrophosphorylase (galU)                                | 273 |
| <i>HP_0648</i>   | 2313767 | 693286-694551 | UDP-N-acetylglucosamine enolpyruvyl transferase(murZ)               | 422 |
| <i>HP_0650</i>   | 2313777 | 696063-696650 | predicted coding region HP0650                                      | 196 |
| <i>HP_0654</i>   | 2313779 | 699570-700649 | conserved hypothetical protein                                      | 360 |
| <i>HP_0656</i>   | 2313781 | 703397-704545 | conserved hypothetical protein                                      | 383 |
| <i>**HP_0661</i> | 2313784 | 709533-709961 | ribonuclease H (rnhA)                                               | 143 |
| <i>* HP_0663</i> | 2313786 | 710692-711786 | chorismate synthase (aroC)                                          | 365 |
| <i>HP_0664</i>   | 2313791 | 711827-712339 | predicted coding region HP0664                                      | 171 |
| <i>HP_0680</i>   | 2313806 | 729052-731415 | ribonucleoside-diphosphate reductase 1 alpha subunit (nrdA)         | 788 |
| <i>HP_0688</i>   | 2313822 | 739466-739963 | predicted coding region HP0688                                      | 166 |
| <i>HP_0692</i>   | 2313816 | 742440-743060 | 3-oxoadipate coA-transferase subunit B (yxjE)                       | 207 |



|                  |         |               |                                                     |     |
|------------------|---------|---------------|-----------------------------------------------------|-----|
| <i>HP_0697</i>   | 2313821 | 750262-750765 | predicted coding region HP0697                      | 168 |
| <i>HP_0700</i>   | 2313825 | 752106-752489 | diacylglycerol kinase (dgkA)                        | 128 |
| <i>HP_0702</i>   | 2313831 | 754992-755465 | predicted coding region HP0702                      | 158 |
| * <i>HP_0714</i> | 2313838 | 768092-769333 | RNA polymerase sigma-54 factor (rpoN)               | 414 |
| <i>HP_0715</i>   | 2313839 | 769339-770058 | ABC transporter, ATP-binding protein                | 240 |
| <i>HP_0716</i>   | 2313840 | 770074-770472 | conserved hypothetical protein                      | 133 |
| <i>HP_0720</i>   | 2313853 | 773436-773594 | predicted coding region HP0720                      | 53  |
| <i>HP_0728</i>   | 2313855 | 783154-784161 | conserved hypothetical protein                      | 336 |
| <i>HP_0735</i>   | 2313857 | 790701-791159 | xanthine guanine phosphoribosyl<br>transferase(gpt) | 153 |
| <i>HP_0736</i>   | 2313858 | 791171-792277 | phosphoserine aminotransferase (serC)               | 369 |
| <i>HP_0737</i>   | 2313859 | 792424-792897 | conserved hypothetical integral<br>membraneprotein  | 158 |
| <i>HP_0739</i>   | 2313861 | 794021-794743 | 2-hydroxy-6-oxohepta-2,4-dienoate hydrolase         | 241 |
| <i>HP_0741</i>   | 2313863 | 796224-796706 | conserved hypothetical protein                      | 161 |
| <i>HP_0742</i>   | 2313870 | 796774-797727 | phosphoribosylpyrophosphate synthetase<br>(prsA)    | 318 |
| <i>HP_0745</i>   | 2313872 | 800330-801310 | conserved hypothetical protein                      | 327 |
| <i>HP_0748</i>   | 2313874 | 803712-804380 | cell division protein (ftsE)                        | 223 |
| <i>HP_0751</i>   | 2313876 | 806464-806820 | polar flagellin (flaG)                              | 119 |
| <i>HP_0754</i>   | 2313888 | 809303-809539 | predicted coding region HP0754                      | 79  |
| <i>HP_0755</i>   | 2313882 | 809635-810264 | molybdopterin biosynthesis protein (moeB)           | 210 |
| <i>HP_0758</i>   | 2313884 | 811424-812734 | conserved hypothetical integral<br>membraneprotein  | 437 |
| <i>HP_0759</i>   | 2313885 | 812800-814050 | conserved hypothetical integral                     | 417 |

|                  |         |               |                                                                                     |     |
|------------------|---------|---------------|-------------------------------------------------------------------------------------|-----|
|                  |         |               | membraneprotein                                                                     |     |
| <i>HP_0760</i>   | 2313886 | 814057-815442 | conserved hypothetical protein                                                      | 462 |
| <i>HP_0762</i>   | 2313890 | 816317-816871 | predicted coding region HP0762                                                      | 185 |
| <i>HP_0763</i>   | 2313887 | 816883-817761 | cell division protein (ftsY)                                                        | 293 |
| * <i>HP_0770</i> | 2313898 | 822128-823201 | flagellar biosynthetic protein (flhB)                                               | 358 |
| <i>HP_0771</i>   | 2313903 | 823280-824014 | predicted coding region HP0771                                                      | 245 |
| <i>HP_0773</i>   | 2313904 | 825365-826453 | predicted coding region HP0773                                                      | 363 |
| <i>HP_0774</i>   | 2313900 | 826473-827678 | tyrosyl-tRNA synthetase (tyrS)                                                      | 402 |
| <i>HP_0776</i>   | 2313905 | 830019-830270 | predicted coding region HP0776                                                      | 84  |
| <i>HP_0777</i>   | 2313902 | 830285-831004 | uridine 5'-monophosphate (UMP) kinase<br>(pyrH)                                     | 240 |
| <i>HP_0778</i>   | 2313912 | 831115-831795 | predicted coding region HP0778                                                      | 227 |
| <i>HP_0780</i>   | 2313913 | 834559-834828 | predicted coding region HP0780                                                      | 90  |
| <i>HP_0784</i>   | 2313917 | 838719-838850 | predicted coding region HP0784                                                      | 44  |
| <i>HP_0785</i>   | 2313909 | 838881-839432 | conserved hypothetical secreted protein                                             | 184 |
| <i>HP_0786</i>   | 2313910 | 839580-842174 | preprotein translocase subunit (secA)                                               | 865 |
| <i>HP_0794</i>   | 2313923 | 851020-851607 | ATP-dependent clp protease proteolytic<br>component(clpP)                           | 196 |
| <i>HP_0802</i>   | 2313933 | 856624-857199 | GTP cyclohydrolase II (ribA)                                                        | 192 |
| <i>HP_0804</i>   | 2313934 | 858219-859250 | GTP cyclohydrolase II/3,4-dihydroxy-2-<br>butanone4-phosphate synthase (ribA, ribB) | 344 |
| <i>HP_0805</i>   | 2313935 | 859424-860275 | lipooligosaccharide 5G8 epitopebiosynthesis-<br>associated protein (lex2B)          | 284 |
| * <i>HP_0808</i> | 2313937 | 863554-863910 | holo-acyl synthase (acpS)                                                           | 119 |
| <i>HP_0809</i>   | 2313942 | 863920-864468 | predicted coding region HP0809                                                      | 183 |

|                  |         |               |                                                 |     |
|------------------|---------|---------------|-------------------------------------------------|-----|
| <i>HP_0813</i>   | 2313945 | 866980-867594 | conserved hypothetical protein                  | 205 |
| <i>HP_0815</i>   | 2313947 | 868381-869151 | flagellar motor rotation protein (motA)         | 257 |
| * <i>HP_0816</i> | 2313948 | 869157-869927 | flagellar motor rotation protein (motB)         | 257 |
| <i>HP_0817</i>   | 2313955 | 869927-870370 | predicted coding region HP0817                  | 148 |
| <i>HP_0821</i>   | 2313951 | 873393-875174 | excinuclease ABC subunit C (uvrC)               | 594 |
| <i>HP_0823</i>   | 2313953 | 876454-876795 | conserved hypothetical protein                  | 114 |
| * <i>HP_0824</i> | 2313958 | 876887-877204 | thioredoxin (trxA)                              | 106 |
| <i>HP_0825</i>   | 2313959 | 877212-878144 | thioredoxin reductase (trxB)                    | 311 |
| <i>HP_0828</i>   | 2313962 | 879966-880643 | ATP synthase F0, subunit a (atpB)               | 226 |
| <i>HP_0830</i>   | 2313964 | 882223-883581 | Glu-tRNA(Gln) amidotransferase, subunit A(gatA) | 453 |
| <i>HP_0831</i>   | 2313965 | 883643-884230 | conserved hypothetical ATP binding protein      | 196 |
| * <i>HP_0835</i> | 2313970 | 887585-887866 | histone-like DNA-binding protein HU (hup)       | 94  |
| <i>HP_0836</i>   | 2313978 | 888471-888827 | predicted coding region HP0836                  | 119 |
| <i>HP_0837</i>   | 2313979 | 888773-889078 | predicted coding region HP0837                  | 102 |
| <i>HP_0838</i>   | 2313980 | 889101-889715 | predicted coding region HP0838                  | 205 |
| <i>HP_0840</i>   | 2313972 | 891482-892480 | flaA1 protein                                   | 333 |
| <i>HP_0842</i>   | 2313981 | 893757-894491 | predicted coding region HP0842                  | 245 |
| <i>HP_0851</i>   | 2313985 | 902875-903555 | conserved hypothetical integral membraneprotein | 227 |
| <i>HP_0860</i>   | 2313992 | 913295-913813 | conserved hypothetical protein                  | 173 |
| <i>HP_0866</i>   | 2313994 | 917926-918417 | transcription elongation factor GreA (greA)     | 164 |
| <i>HP_0869</i>   | 2313996 | 920008-920358 | hydrogenase expression/formation protein (hypA) | 117 |
| <i>HP_0875</i>   | 2314010 | 925574-927088 | catalase                                        | 505 |

|                |         |                |                                                                    |     |
|----------------|---------|----------------|--------------------------------------------------------------------|-----|
| <i>HP_0877</i> | 2314012 | 929790-930260  | Holliday junction endodeoxyribonuclease<br>(ruvC)                  | 157 |
| <i>HP_0878</i> | 2314018 | 930391-930561  | predicted coding region HP0878                                     | 57  |
| <i>HP_0884</i> | 2314027 | 933398-935239  | predicted coding region HP0884                                     | 614 |
| <i>HP_0886</i> | 2314022 | 936793-938187  | cysteinyI-tRNA synthetase (cysS)                                   | 465 |
| <i>HP_0888</i> | 2314024 | 942350-943114  | iron(III) dicitrate ABC transporter, ATP-<br>bindingprotein (fecE) | 255 |
| <i>HP_0889</i> | 2314025 | 943117-944094  | iron(III) dicitrate ABC transporter,<br>permeaseprotein (fecD)     | 326 |
| <i>HP_0899</i> | 2314034 | 951861-952091  | hydrogenase expression/formation protein<br>(hypC)                 | 77  |
| <i>HP_0900</i> | 2314035 | 952094-952819  | hydrogenase expression/formation protein<br>(hypB)                 | 242 |
| <i>HP_0908</i> | 2314044 | 959021-960835  | flagellar hook (flgE)                                              | 605 |
| <i>HP_0918</i> | 2314058 | 973728-974156  | predicted coding region HP0918                                     | 143 |
| <i>HP_0920</i> | 2314055 | 977520-978209  | conserved hypothetical integral<br>membraneprotein                 | 230 |
| <i>HP_0925</i> | 2314062 | 988604-989182  | recombinational DNA repair protein (recR)                          | 193 |
| <i>HP_0928</i> | 2314065 | 991247-991786  | GTP cyclohydrolase I (foIE)                                        | 180 |
| <i>HP_0929</i> | 2314066 | 991805-992713  | geranyltranstransferase (ispA)                                     | 303 |
| <i>HP_0930</i> | 2314067 | 992713-993513  | stationary-phase survival protein (surE)                           | 267 |
| <i>HP_0931</i> | 2314071 | 993513-993950  | predicted coding region HP0931                                     | 146 |
| <i>HP_0932</i> | 2314072 | 993869-994168  | predicted coding region HP0932                                     | 100 |
| <i>HP_0933</i> | 2314073 | 994173-994772  | predicted coding region HP0933                                     | 200 |
| <i>HP_0939</i> | 2314077 | 999610-1000320 | amino acid ABC transporter, permease                               | 237 |

|                  |         |                     |                                                         |     |
|------------------|---------|---------------------|---------------------------------------------------------|-----|
|                  |         |                     | protein(yckJ)                                           |     |
| <i>HP_0944</i>   | 2314082 | 1004932-<br>1005306 | conserved hypothetical protein                          | 125 |
| <i>HP_0950</i>   | 2314089 | 1010691-<br>1011557 | acetyl-CoA carboxylase beta subunit (accD)              | 289 |
| <i>HP_0951</i>   | 2314100 | 1011635-<br>1012249 | predicted coding region HP0951                          | 205 |
| <i>HP_0955</i>   | 2314092 | 1014185-<br>1015036 | prolipoprotein diacylglycerol transferase (lgt)         | 284 |
| <i>HP_0958</i>   | 2314102 | 1016971-<br>1017732 | predicted coding region HP0958                          | 254 |
| * <i>HP_0961</i> | 2314097 | 1019388-<br>1020323 | glycerol-3-phosphate dehydrogenase,<br>NAD(P)+dependent | 312 |
| <i>HP_0975</i>   | 2314117 | 1037309-<br>1037587 | Glu-tRNA(Gln) amidotransferase, subunit<br>C(gatC)      | 93  |
| <i>HP_0980</i>   | 2314122 | 1044552-<br>1044851 | conserved hypothetical secreted protein                 | 100 |
| <i>HP_1010</i>   | 2314153 | 1072429-<br>1074453 | polyphosphate kinase (ppk)                              | 675 |
| * <i>HP_1013</i> | 2314156 | 1076894-<br>1077793 | dihydrodipicolinate synthetase (dapA)                   | 300 |
| <i>HP_1016</i>   | 2314161 | 1079133-<br>1079732 | phosphatidylglycerophosphate synthase<br>(pgsA)         | 200 |
| <i>HP_1019</i>   | 2314163 | 1081537-<br>1082865 | serine protease (htrA)                                  | 443 |

|                |         |                     |                                              |     |
|----------------|---------|---------------------|----------------------------------------------|-----|
| <i>HP_1025</i> | 2314167 | 1088509-<br>1088877 | putative heat shock protein (hspR)           | 123 |
| <i>HP_1026</i> | 2314168 | 1088877-<br>1090049 | conserved hypothetical helicase-like protein | 391 |
| <i>HP_1027</i> | 2314174 | 1090212-<br>1090661 | ferric uptake regulation protein (fur)       | 150 |
| <i>HP_1031</i> | 2314176 | 1092613-<br>1093674 | flagellar motor switch protein (fliM)        | 354 |
| <i>HP_1038</i> | 2314182 | 1098565-<br>1099065 | 3-dehydroquinase type II (aroQ)              | 167 |
| <i>HP_1040</i> | 2314183 | 1100517-<br>1100786 | ribosomal protein S15 (rps15)                | 90  |
| <i>HP_1041</i> | 2314189 | 1100927-<br>1103125 | flagellar biosynthesis protein (flhA)        | 733 |
| <i>HP_1043</i> | 2314190 | 1104748-<br>1105416 | response regulator                           | 223 |
| <i>HP_1046</i> | 2314193 | 1109182-<br>1109619 | conserved hypothetical protein               | 146 |
| <i>HP_1047</i> | 2314194 | 1109615-<br>1109947 | ribosome-binding factor A (rbfA)             | 111 |
| <i>HP_1049</i> | 2314196 | 1112781-<br>1113047 | conserved hypothetical protein               | 89  |
| <i>HP_1050</i> | 2314197 | 1113022-<br>1113900 | homoserine kinase (thrB)                     | 293 |
| <i>HP_1052</i> | 2314201 | 1114452-            | UDP-3-O-acyl N-acetylglucosamine             | 295 |

|                  |         |                     |                                                           |     |
|------------------|---------|---------------------|-----------------------------------------------------------|-----|
|                  |         | 1115336             | deacetylase(envA)                                         |     |
| <i>HP_1058</i>   | 2314202 | 1119911-<br>1120720 | 3-methyl-2-oxobutanoate<br>hydroxymethyltransferase(panB) | 270 |
| <i>HP_1059</i>   | 2314203 | 1120723-<br>1121730 | Holliday junction DNA helicase (ruvB)                     | 336 |
| <i>HP_1063</i>   | 2314206 | 1124072-<br>1124605 | glucose-inhibited division protein (gidB)                 | 178 |
| <i>HP_1065</i>   | 2314215 | 1124835-<br>1125239 | predicted coding region HP1065                            | 135 |
| <i>HP_1066</i>   | 2314207 | 1125378-<br>1125977 | conserved hypothetical protein                            | 200 |
| <i>HP_1067</i>   | 2314217 | 1126268-<br>1126639 | chemotaxis protein (cheY)                                 | 124 |
| <i>HP_1071</i>   | 2314220 | 1129798-<br>1130508 | phosphatidylserine synthase (pssA)                        | 237 |
| * <i>HP_1073</i> | 2314224 | 1132746-<br>1132943 | copper ion binding protein (copP)                         | 66  |
| <i>HP_1081</i>   | 2314238 | 1139472-<br>1140092 | predicted coding region HP1081                            | 207 |
| <i>HP_1082</i>   | 2314232 | 1140089-<br>1141741 | multidrug resistance protein (msbA)                       | 551 |
| <i>HP_1085</i>   | 2314240 | 1144517-<br>1145029 | predicted coding region HP1085                            | 171 |
| <i>HP_1088</i>   | 2314236 | 1146594-<br>1148516 | transketolase A (tktA)                                    | 641 |

|                  |         |                     |                                                     |     |
|------------------|---------|---------------------|-----------------------------------------------------|-----|
| <i>HP_1101</i>   | 2314250 | 1162198-<br>1163472 | glucose-6-phosphate dehydrogenase (g6pD)            | 425 |
| <i>HP_1102</i>   | 2314251 | 1163486-<br>1164166 | glucose-6-phosphate 1-dehydrogenase (devB)          | 227 |
| * <i>HP_1103</i> | 2314252 | 1164156-<br>1165163 | glucokinase (glk)                                   | 336 |
| <i>HP_1108</i>   | 2314259 | 1170138-<br>1170695 | pyruvate ferredoxin oxidoreductase,<br>gammasubunit | 186 |
| <i>HP_1109</i>   | 2314260 | 1170714-<br>1171103 | pyruvate ferredoxin oxidoreductase,<br>deltasubunit | 130 |
| <i>HP_1111</i>   | 2314262 | 1172352-<br>1173293 | pyruvate ferredoxin oxidoreductase,<br>betasubunit  | 314 |
| <i>HP_1120</i>   | 2314274 | 1186445-<br>1186876 | predicted coding region HP1120                      | 144 |
| <i>HP_1129</i>   | 2314280 | 1192860-<br>1193258 | biopolymer transport protein (exbD)                 | 133 |
| <i>HP_1131</i>   | 2314282 | 1193894-<br>1194265 | ATP synthase F1, subunit epsilon (atpC)             | 124 |
| <i>HP_1132</i>   | 2314283 | 1194276-<br>1195682 | ATP synthase F1, subunit beta (atpD)                | 469 |
| <i>HP_1133</i>   | 2314284 | 1195708-<br>1196610 | ATP synthase F1, subunit gamma (atpG)               | 301 |
| * <i>HP_1134</i> | 2314285 | 1196628-<br>1198136 | ATP synthase F1, subunit alpha (atpA)               | 503 |
| <i>HP_1135</i>   | 2314286 | 1198160-            | ATP synthase F1, subunit delta (atpH)               | 180 |



|                  |         |                     |                                               |     |
|------------------|---------|---------------------|-----------------------------------------------|-----|
|                  |         | 1198699             |                                               |     |
| * <i>HP_1136</i> | 2314287 | 1198703-<br>1199215 | ATP synthase F0, subunit b (atpF)             | 171 |
| <i>HP_1137</i>   | 2314288 | 1199222-<br>1199653 | ATP synthase F0, subunit b' (atpF')           | 144 |
| <i>HP_1138</i>   | 2314294 | 1199767-<br>1200636 | plasmid replication-partition related protein | 290 |
| * <i>HP_1147</i> | 2314302 | 1211234-<br>1211587 | ribosomal protein L19 (rpl19)                 | 118 |
| <i>HP_1151</i>   | 2314310 | 1213221-<br>1213448 | ribosomal protein S16 (rpS16)                 | 76  |
| * <i>HP_1152</i> | 2314305 | 1213525-<br>1214868 | signal recognition particle protein (ffh)     | 448 |
| <i>HP_1159</i>   | 2314309 | 1225846-<br>1226376 | cell filamentation protein (fic)              | 177 |
| <i>HP_1160</i>   | 2314318 | 1226473-<br>1226892 | conserved hypothetical protein                | 140 |
| <i>HP_1161</i>   | 2314319 | 1226950-<br>1227441 | flavodoxin (fldA)                             | 164 |
| <i>HP_1163</i>   | 2314326 | 1228239-<br>1228427 | predicted coding region HP1163                | 63  |
| * <i>HP_1164</i> | 2314321 | 1228455-<br>1229426 | thioredoxin reductase (trxB)                  | 324 |
| * <i>HP_1166</i> | 2314323 | 1230660-<br>1232294 | glucose-6-phosphate isomerase (pgi)           | 545 |

|                  |         |                     |                                                         |     |
|------------------|---------|---------------------|---------------------------------------------------------|-----|
| <i>HP_1170</i>   | 2314329 | 1237227-<br>1237895 | glutamine ABC transporter, permease<br>protein(glnP)    | 223 |
| * <i>HP_1171</i> | 2314330 | 1237900-<br>1238643 | glutamine ABC transporter, ATP-binding<br>protein(glnQ) | 248 |
| <i>HP_1173</i>   | 2314338 | 1239650-<br>1240198 | predicted coding region HP1173                          | 183 |
| <i>HP_1175</i>   | 2314333 | 1241828-<br>1243132 | conserved hypothetical integral<br>membraneprotein      | 435 |
| * <i>HP_1178</i> | 2314335 | 1245967-<br>1246665 | purine-nucleoside phosphorylase (deoD)                  | 233 |
| <i>HP_1186</i>   | 2314346 | 1255772-<br>1256377 | carbonic anhydrase                                      | 202 |
| <i>HP_1189</i>   | 2314350 | 1259622-<br>1260659 | aspartate-semialdehyde dehydrogenase (asd)              | 346 |
| <i>HP_1190</i>   | 2314351 | 1260649-<br>1261974 | histidyl-tRNA synthetase (hisS)                         | 442 |
| <i>HP_1196</i>   | 2314355 | 1267401-<br>1267865 | ribosomal protein S7 (rps7)                             | 155 |
| <i>HP_1199</i>   | 2314361 | 1277276-<br>1277650 | ribosomal protein L7/L12 (rpl7/l12)                     | 125 |
| <i>HP_1201</i>   | 2314363 | 1278302-<br>1279003 | ribosomal protein L1 (rpl1)                             | 234 |
| <i>HP_1202</i>   | 2314364 | 1279051-<br>1279473 | ribosomal protein L11 (rpl11)                           | 141 |
| <i>HP_1203</i>   | 2314365 | 1279494-            | transcription termination factor NusG (nusG)            | 176 |

|                |         |                     |                                                    |     |
|----------------|---------|---------------------|----------------------------------------------------|-----|
|                |         | 1280021             |                                                    |     |
| <i>HP_1205</i> | 2314366 | 1280682-<br>1281878 | translation elongation factor EF-Tu (tufB)         | 399 |
| <i>HP_1207</i> | 2314372 | 1284327-<br>1284992 | predicted coding region HP1207                     | 222 |
| <i>HP_1211</i> | 2314384 | 1287786-<br>1288028 | predicted coding region HP1211                     | 81  |
| <i>HP_1212</i> | 2314374 | 1288091-<br>1288405 | ATP synthase F0, subunit c (atpE)                  | 105 |
| <i>HP_1220</i> | 2314379 | 1295707-<br>1296390 | ABC transporter, ATP-binding protein (yhcG)        | 228 |
| <i>HP_1223</i> | 2314397 | 1300041-<br>1300370 | predicted coding region HP1223                     | 110 |
| <i>HP_1225</i> | 2314388 | 1301104-<br>1301493 | conserved hypothetical integral<br>membraneprotein | 130 |
| <i>HP_1228</i> | 2314391 | 1303120-<br>1303584 | invasion protein (invA)                            | 155 |
| <i>HP_1229</i> | 2314392 | 1303589-<br>1304803 | aspartokinase (lysC)                               | 405 |
| <i>HP_1231</i> | 2314393 | 1305342-<br>1305995 | DNA polymerase III delta prime subunit (holB)      | 218 |
| <i>HP_1233</i> | 2314399 | 1307235-<br>1307693 | predicted coding region HP1233                     | 153 |
| <i>HP_1234</i> | 2314395 | 1308086-<br>1308979 | conserved hypothetical integral<br>membraneprotein | 298 |

|                |         |                     |                                                       |     |
|----------------|---------|---------------------|-------------------------------------------------------|-----|
| <i>HP_1236</i> | 2314406 | 1310312-<br>1310860 | predicted coding region HP1236                        | 183 |
| <i>HP_1240</i> | 2314403 | 1313617-<br>1314186 | conserved hypothetical protein                        | 190 |
| <i>HP_1242</i> | 2314405 | 1316851-<br>1317078 | conserved hypothetical protein                        | 76  |
| <i>HP_1254</i> | 2314418 | 1329963-<br>1330682 | biotin synthesis protein (bioC)                       | 240 |
| <i>HP_1256</i> | 2314423 | 1331404-<br>1331958 | ribosome releasing factor (frr)                       | 185 |
| <i>HP_1257</i> | 2314424 | 1331965-<br>1332567 | orotate phosphoribosyltransferase (pyrE)              | 201 |
| <i>HP_1258</i> | 2314425 | 1332560-<br>1333021 | conserved hypothetical mitochondrial protein 4        | 154 |
| <i>HP_1259</i> | 2314426 | 1333094-<br>1333708 | conserved hypothetical protein                        | 205 |
| <i>HP_1260</i> | 2314427 | 1333813-<br>1334211 | NADH-ubiquinone oxidoreductase, NQO7<br>subunit(NQO7) | 133 |
| <i>HP_1261</i> | 2314428 | 1334214-<br>1334690 | NADH-ubiquinone oxidoreductase, NQO6<br>subunit(NQO6) | 159 |
| <i>HP_1262</i> | 2314429 | 1334690-<br>1335487 | NADH-ubiquinone oxidoreductase, NQO5<br>subunit(NQO5) | 266 |
| <i>HP_1263</i> | 2314430 | 1335492-<br>1336718 | NADH-ubiquinone oxidoreductase, NQO4<br>subunit(NQO4) | 409 |
| <i>HP_1264</i> | 2314442 | 1336718-            | predicted coding region HP1264                        | 76  |

|                |         |                     |                                                         |     |
|----------------|---------|---------------------|---------------------------------------------------------|-----|
|                |         | 1336945             |                                                         |     |
| <i>HP_1269</i> | 2314434 | 1342120-<br>1342665 | NADH-ubiquinone oxidoreductase, NQO10<br>subunit(NQO10) | 182 |
| <i>HP_1273</i> | 2314438 | 1346337-<br>1347806 | NADH-ubiquinone oxidoreductase, NQO14<br>subunit(NQO14) | 490 |
| <i>HP_1281</i> | 2314447 | 1356689-<br>1357270 | anthranilate synthase component II (trpD)               | 194 |
| <i>HP_1285</i> | 2314453 | 1361660-<br>1362349 | conserved hypothetical secreted protein                 | 230 |
| <i>HP_1290</i> | 2314456 | 1365401-<br>1366060 | nicotinamide mononucleotide transporter<br>(pnuC)       | 220 |
| <i>HP_1291</i> | 2314457 | 1366051-<br>1366662 | conserved hypothetical protein                          | 204 |
| <i>HP_1292</i> | 2314458 | 1367375-<br>1367722 | ribosomal protein L17 (rpl17)                           | 116 |
| <i>HP_1293</i> | 2314459 | 1367725-<br>1368756 | DNA-directed RNA polymerase, alpha<br>subunit(rpoA)     | 344 |
| <i>HP_1294</i> | 2314460 | 1368771-<br>1369394 | ribosomal protein S4 (rps4)                             | 208 |
| <i>HP_1295</i> | 2314461 | 1369407-<br>1369799 | ribosomal protein S11 (rps11)                           | 131 |
| <i>HP_1296</i> | 2314462 | 1369825-<br>1370184 | ribosomal protein S13 (rps13)                           | 120 |
| <i>HP_1299</i> | 2314463 | 1370601-<br>1371359 | methionine amino peptidase (map)                        | 253 |

|                |         |                     |                                       |     |
|----------------|---------|---------------------|---------------------------------------|-----|
| <i>HP_1300</i> | 2314464 | 1371362-<br>1372621 | preprotein translocase subunit (secY) | 420 |
| <i>HP_1301</i> | 2314465 | 1372667-<br>1373071 | ribosomal protein L15 (rpl15)         | 135 |
| <i>HP_1302</i> | 2314466 | 1373088-<br>1373546 | ribosomal protein S5 (rps5)           | 153 |
| <i>HP_1303</i> | 2314467 | 1373546-<br>1373902 | ribosomal protein L18 (rpl18)         | 119 |
| <i>HP_1305</i> | 2314469 | 1374463-<br>1374855 | ribosomal protein S8 (rps8)           | 131 |
| <i>HP_1307</i> | 2314470 | 1375063-<br>1375605 | ribosomal protein L5 (rpl5)           | 181 |
| <i>HP_1311</i> | 2314485 | 1376486-<br>1376683 | ribosomal protein L29 (rpL29)         | 66  |
| <i>HP_1313</i> | 2314475 | 1377101-<br>1377802 | ribosomal protein S3 (rps3)           | 234 |
| <i>HP_1314</i> | 2314476 | 1377809-<br>1378174 | ribosomal protein L22 (rpl22)         | 122 |
| <i>HP_1316</i> | 2314478 | 1378479-<br>1379306 | ribosomal protein L2 (rpl2)           | 276 |
| <i>HP_1318</i> | 2314480 | 1379611-<br>1380255 | ribosomal protein L4 (rpl4)           | 215 |
| <i>HP_1319</i> | 2314481 | 1380293-<br>1380865 | ribosomal protein L3 (rpl3)           | 191 |
| <i>HP_1323</i> | 2314491 | 1383302-            | ribonuclease HII (rnhB)               | 209 |

|                  |         |                     |                                                    |     |
|------------------|---------|---------------------|----------------------------------------------------|-----|
|                  |         | 1383928             |                                                    |     |
| <i>HP_1325</i>   | 2314492 | 1384220-<br>1385608 | fumarase (fumC)                                    | 463 |
| <i>HP_1326</i>   | 2314500 | 1385783-<br>1386157 | predicted coding region HP1326                     | 125 |
| <i>HP_1330</i>   | 2314495 | 1391530-<br>1391874 | conserved hypothetical integral<br>membraneprotein | 115 |
| <i>HP_1336</i>   | 2314515 | 1397061-<br>1397819 | predicted coding region HP1336                     | 253 |
| * <i>HP_1338</i> | 2314505 | 1398330-<br>1398773 | conserved hypothetical protein                     | 148 |
| <i>HP_1346</i>   | 2314512 | 1406102-<br>1407091 | glyceraldehyde-3-phosphate dehydrogenase<br>(gap)  | 330 |
| <i>HP_1356</i>   | 2314524 | 1417892-<br>1418899 | quinolinate synthetase A (nadA)                    | 336 |
| <i>HP_1357</i>   | 2314525 | 1418892-<br>1419692 | phosphatidylserine decarboxylase<br>proenzyme(psd) | 267 |
| <i>HP_1358</i>   | 2314534 | 1419689-<br>1420192 | predicted coding region HP1358                     | 168 |
| <i>HP_1360</i>   | 2314526 | 1420695-<br>1421576 | 4-hydroxybenzoate octaprenyltransferase<br>(ubiA)  | 294 |
| <i>HP_1372</i>   | 2314542 | 1436254-<br>1436997 | rod shape-determining protein (mreC)               | 248 |
| <i>HP_1373</i>   | 2314543 | 1437004-<br>1438044 | rod shape-determining protein (mreB)               | 347 |

|                  |         |                     |                                                    |     |
|------------------|---------|---------------------|----------------------------------------------------|-----|
| <i>HP_1374</i>   | 2314544 | 1438090-<br>1439427 | ATP-dependent protease ATPase subunit<br>(clpX)    | 446 |
| <i>HP_1377</i>   | 2314555 | 1440899-<br>1441336 | predicted coding region HP1377                     | 146 |
| <i>HP_1378</i>   | 2314548 | 1441694-<br>1442353 | competence lipoprotein (comL)                      | 220 |
| <i>HP_1386</i>   | 2314553 | 1448099-<br>1448749 | D-ribulose-5-phosphate 3 epimerase (rpe)           | 217 |
| <i>HP_1391</i>   | 2314568 | 1451760-<br>1452053 | predicted coding region HP1391                     | 98  |
| * <i>HP_1398</i> | 2314564 | 1458585-<br>1459724 | alanine dehydrogenase (ald)                        | 380 |
| <i>HP_1407</i>   | 2314579 | 1471967-<br>1472842 | conserved hypothetical integral<br>membraneprotein | 292 |
| <i>HP_1413</i>   | 2314588 | 1484032-<br>1484475 | conserved hypothetical protein                     | 148 |
| <i>HP_1419</i>   | 2314593 | 1489411-<br>1489674 | flagellar biosynthetic protein (fliQ)              | 88  |
| * <i>HP_1420</i> | 2314594 | 1489688-<br>1490989 | flagellar export protein ATP synthase (fliI)       | 434 |
| <i>HP_1421</i>   | 2314595 | 1490993-<br>1491904 | conjugative transfer regulon protein (trbB)        | 304 |
| <i>HP_1428</i>   | 2314600 | 1497370-<br>1498440 | conserved hypothetical protein                     | 357 |
| * <i>HP_1429</i> | 2314601 | 1498440-            | polysialic acid capsule expression protein         | 329 |



|                 |         |                     |                                                          |     |
|-----------------|---------|---------------------|----------------------------------------------------------|-----|
|                 |         | 1499426             | (kpsF)                                                   |     |
| <i>*HP_1431</i> | 2314603 | 1501520-<br>1502332 | 16S rRNA (adenosine-N6,N6)-<br>dimethyltransferase(ksgA) | 271 |
| <i>HP_1440</i>  | 2314621 | 1513146-<br>1513922 | predicted coding region HP1440                           | 259 |
| <i>HP_1442</i>  | 2314614 | 1514554-<br>1514781 | carbon storage regulator (csrA)                          | 76  |
| <i>HP_1444</i>  | 2314616 | 1515584-<br>1516039 | small protein (smpB)                                     | 152 |
| <i>HP_1449</i>  | 2314625 | 1517547-<br>1517897 | conserved hypothetical protein                           | 117 |
| <i>HP_1458</i>  | 2314636 | 1527775-<br>1528086 | thioredoxin                                              | 104 |
| <i>HP_1459</i>  | 2314637 | 1528144-<br>1528929 | conserved hypothetical protein                           | 262 |
| <i>HP_1468</i>  | 2314646 | 1538765-<br>1539784 | branched-chain-amino-acid<br>aminotransferase(ilvE)      | 340 |
| <i>HP_1474</i>  | 2314650 | 1547338-<br>1547910 | thymidylate kinase (tmk)                                 | 191 |
| <i>HP_1476</i>  | 2314652 | 1548388-<br>1548948 | phenylacrylic acid decarboxylase                         | 187 |
| <i>HP_1485</i>  | 2314657 | 1557746-<br>1558315 | conserved hypothetical protein                           | 190 |
| <i>HP_1492</i>  | 2314672 | 1566261-<br>1566527 | conserved hypothetical nifU-like protein                 | 89  |

|                  |         |                     |                                                    |     |
|------------------|---------|---------------------|----------------------------------------------------|-----|
| <i>* HP_1495</i> | 2314674 | 1568504-<br>1569451 | transaldolase (tal)                                | 316 |
| <i>HP_1496</i>   | 2314675 | 1569509-<br>1570042 | general stress protein (ctc)                       | 178 |
| <i>HP_1497</i>   | 2314676 | 1570055-<br>1570612 | peptidyl-tRNA hydrolase (pth)                      | 186 |
| <i>HP_1504</i>   | 2314678 | 1577242-<br>1577955 | conserved hypothetical protein                     | 238 |
| <i>HP_1509</i>   | 2314690 | 1582845-<br>1583630 | conserved hypothetical integral<br>membraneprotein | 262 |
| <i>HP_1511</i>   | 2314696 | 1583967-<br>1584290 | predicted coding region HP1511                     | 108 |
| <i>* HP_1514</i> | 2314694 | 1588569-<br>1589753 | transcription termination factor NusA (nusA)       | 395 |
| <i>* HP_1523</i> | 2314702 | 1602091-<br>1603959 | DNA recombinase (recG)                             | 623 |
| <i>HP_1526</i>   | 2314703 | 1605027-<br>1605776 | exodeoxyribonuclease (lexA)                        | 250 |
| <i>HP_1530</i>   | 2314710 | 1609150-<br>1609689 | purine nucleoside phosphorylase (punB)             | 180 |
| <i>HP_1531</i>   | 2314716 | 1609735-<br>1609971 | predicted coding region HP1531                     | 79  |
| <i>HP_1533</i>   | 2314712 | 1611722-<br>1612414 | conserved hypothetical protein                     | 231 |
| <i>HP_1540</i>   | 2314722 | 1617984-            | ubiquinol cytochrome c oxidoreductase,             | 167 |

|                |         |                     |                                                    |     |
|----------------|---------|---------------------|----------------------------------------------------|-----|
|                |         | 1618484             | Rieske2Fe-2S subunit (fbcF)                        |     |
| <i>HP_1542</i> | 2314731 | 1621615-<br>1622022 | predicted coding region HP1542                     | 136 |
| <i>HP_1543</i> | 2314724 | 1621944-<br>1622879 | toxR-activated gene (tagE)                         | 312 |
| <i>HP_1547</i> | 2314727 | 1625500-<br>1627917 | leucyl-tRNA synthetase (leuS)                      | 806 |
| <i>HP_1548</i> | 2314728 | 1627930-<br>1628265 | conserved hypothetical integral<br>membraneprotein | 112 |
| <i>HP_1549</i> | 2314729 | 1628278-<br>1629246 | protein-export membrane protein (secF)             | 323 |
| <i>HP_1554</i> | 2314737 | 1635686-<br>1636477 | ribosomal protein S2 (rps2)                        | 264 |
| <i>HP_1555</i> | 2314738 | 1636480-<br>1637544 | translation elongation factor EF-Ts (tsf)          | 355 |
| <i>HP_1557</i> | 2314740 | 1640002-<br>1640328 | flagellar basal-body protein (fliE)                | 109 |
| <i>HP_1558</i> | 2314741 | 1640459-<br>1640941 | flagellar basal-body rod protein (flgC)            | 161 |
| <i>HP_1559</i> | 2314742 | 1640957-<br>1641376 | flagellar basal-body rod protein (flgB)            | 140 |
| <i>HP_1568</i> | 2314755 | 1650097-<br>1650645 | predicted coding region HP1568                     | 183 |
| <i>HP_1569</i> | 2314756 | 1650648-<br>1651238 | predicted coding region HP1569                     | 197 |

|                |         |                     |                                                     |     |
|----------------|---------|---------------------|-----------------------------------------------------|-----|
| <i>HP_1570</i> | 2314751 | 1651216-<br>1651707 | conserved hypothetical protein                      | 164 |
| <i>HP_1573</i> | 2314758 | 1653860-<br>1654621 | conserved hypothetical protein                      | 254 |
| <i>HP_1574</i> | 2314759 | 1654696-<br>1655313 | riboflavin synthase alpha subunit (ribC)            | 206 |
| <i>HP_1575</i> | 2314760 | 1655317-<br>1655586 | ABC transporter, putative                           | 90  |
| <i>HP_1576</i> | 2314761 | 1655611-<br>1656591 | ABC transporter, ATP-binding protein (abc)          | 327 |
| <i>HP_1577</i> | 2314762 | 1656596-<br>1657240 | ABC transporter, permease protein (yaeE)            | 215 |
| <i>HP_1583</i> | 2314766 | 1661400-<br>1662320 | pyridoxal phosphate biosynthetic protein<br>A(pdxA) | 307 |
| <i>HP_1585</i> | 2314768 | 1663590-<br>1664375 | flagellar basal-body rod protein (flgG)             | 262 |
