# Supplementary material for: Recombination-independent rapid convergent evolution of the gastric pathogen Helicobacter pylori
Source: PubMed Central journal article supplement (PMC6249973; doi:10.1186/s12864-018-5231-7), 2018-11-21
Supplement: 12864_2018_5231_MOESM2_ESM.pdf [file 12864_2018_5231_MOESM2_ESM.pdf]

**Figure S1.** Frequency of recombinant regions as detected by PhiPack using single (intra-genic) vs. multiple (inter-genic) genes in ‘global’ subset and ‘local’ (Amerindian) subset of strains (as denoted in Fig. 1).

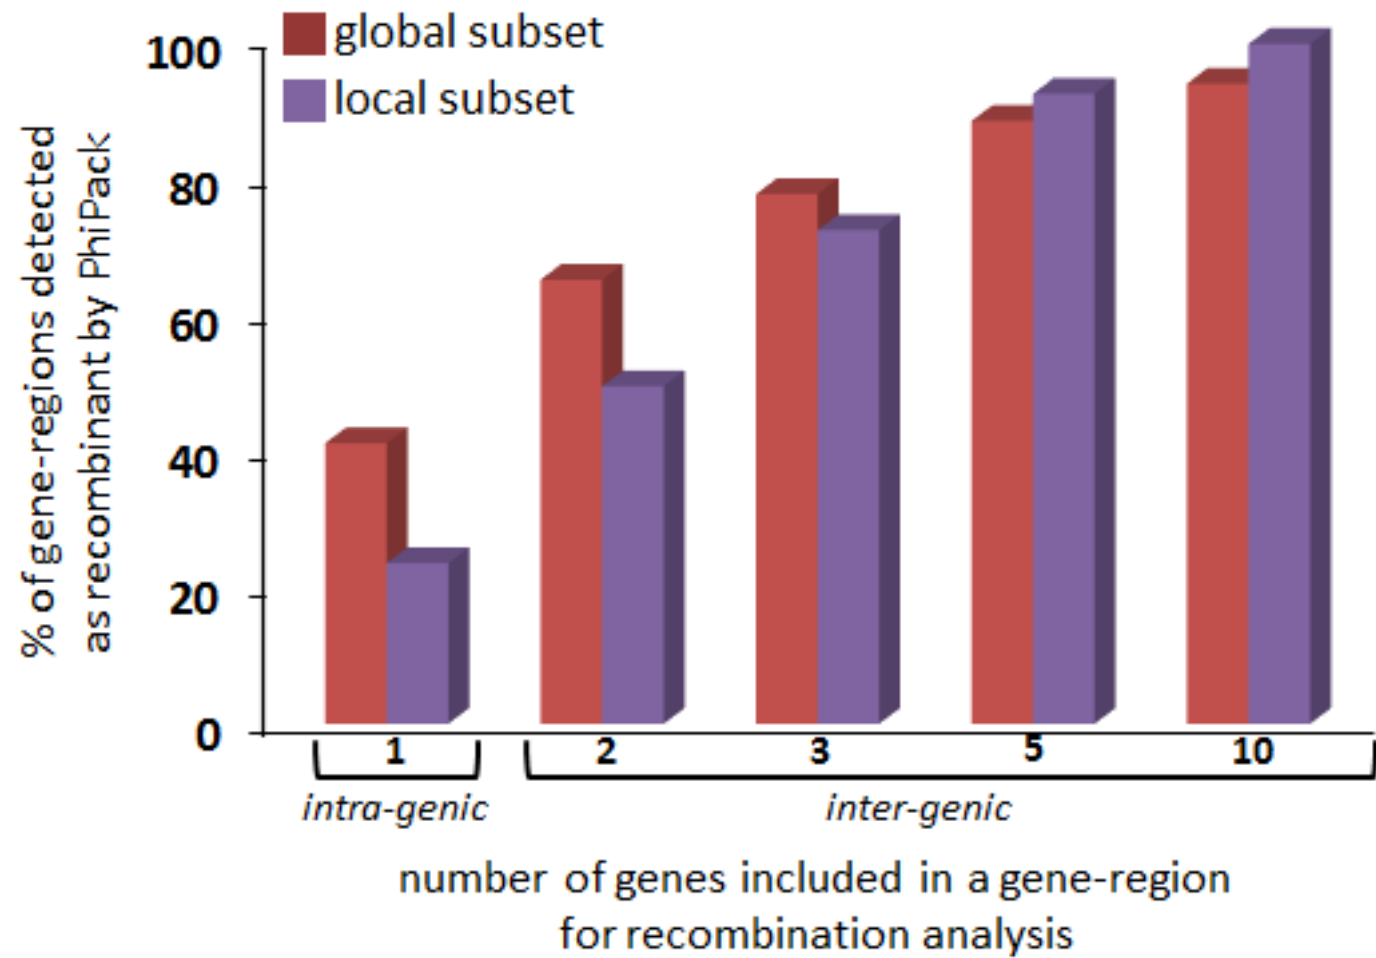

**Figure S2.** The synDss statistic landscapes for 50 randomly selected core genes of *H. pylori*: (A) 25 recombinant and (B) 25 non-recombinant, as designated by three recombination detection statistics in PhiPack software.

(A) 25 randomly selected core genes designated as **recombinants** by PhiPack

HP\_0029

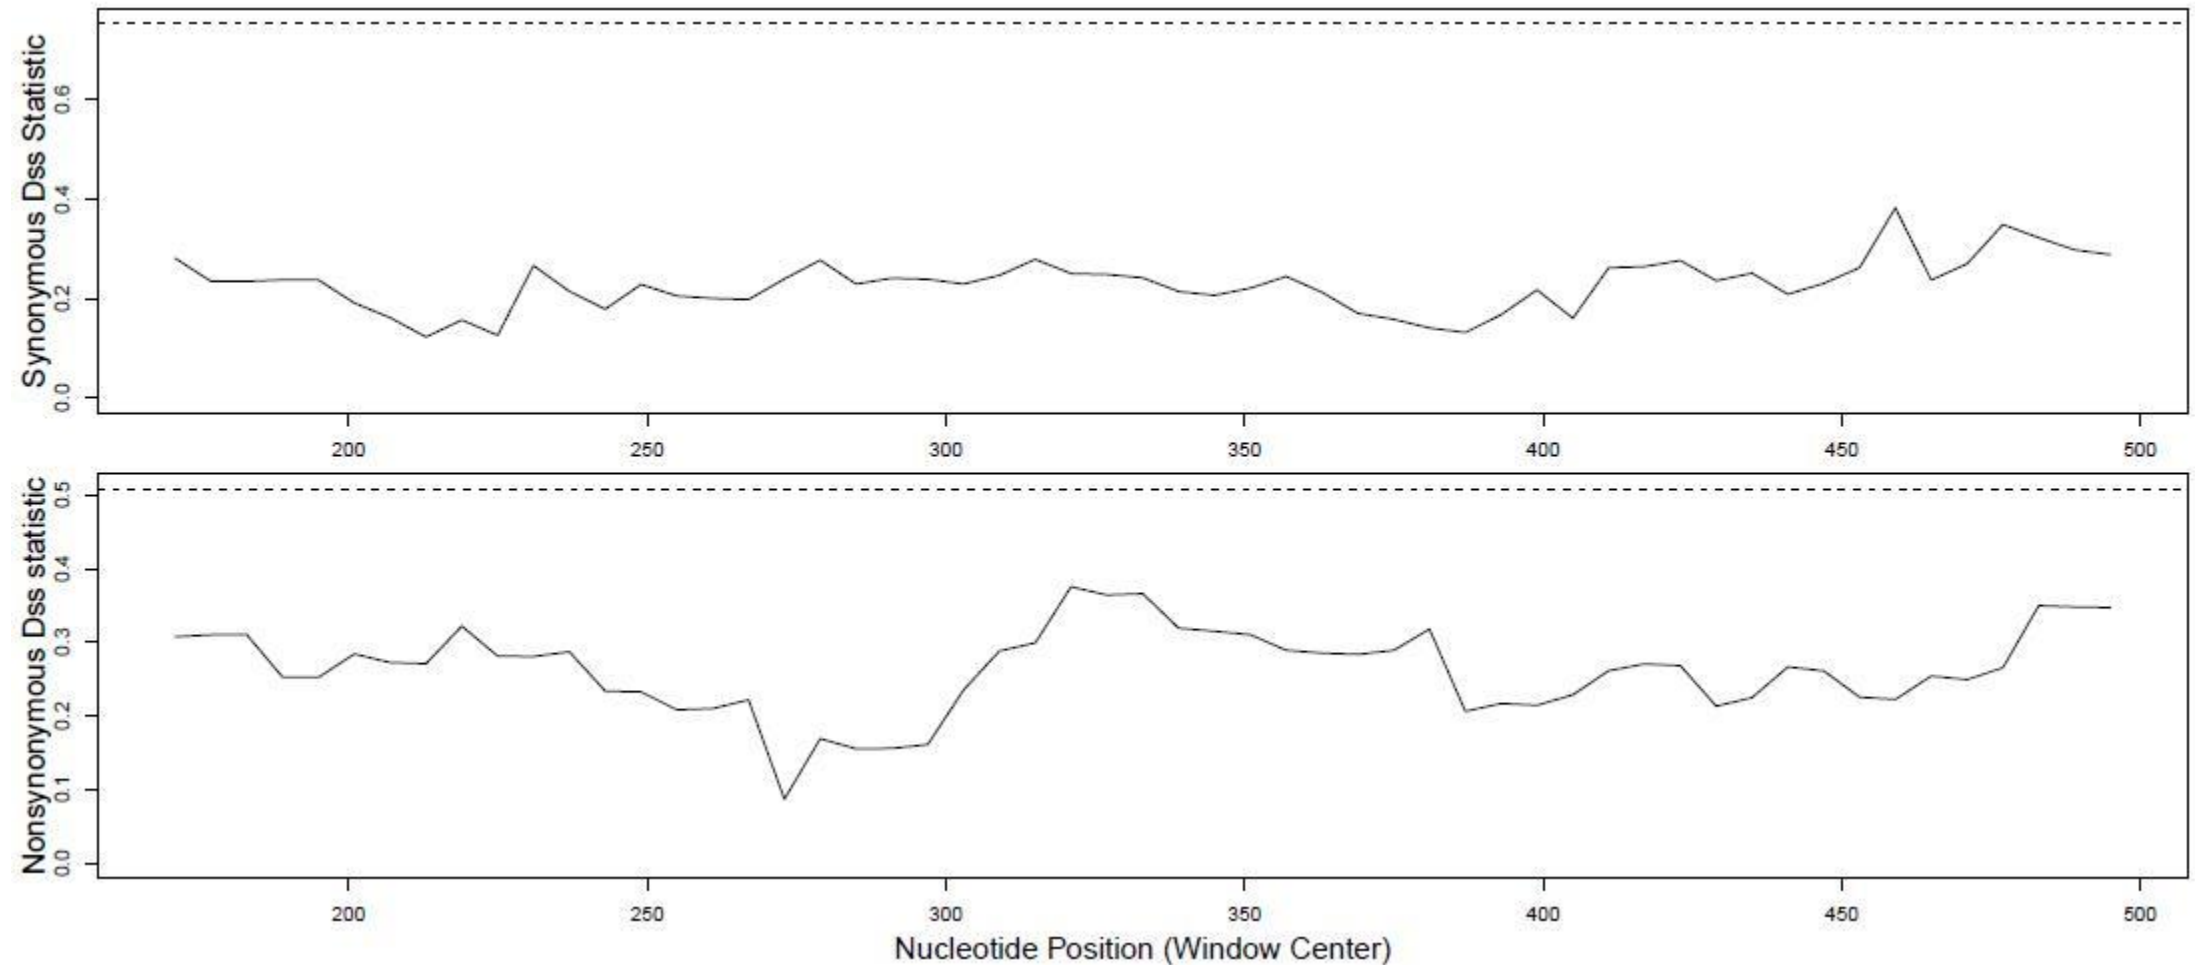

Dss statistic landscapes for synonymous and nonsynonymous changes. Dotted horizontal lines represent the 95% significance level for each test, from a parametric bootstrap with 500 replicates.

(A) 25 randomly selected core genes designated as **recombinants** by PhiPack (CONTD.)

HP\_0042

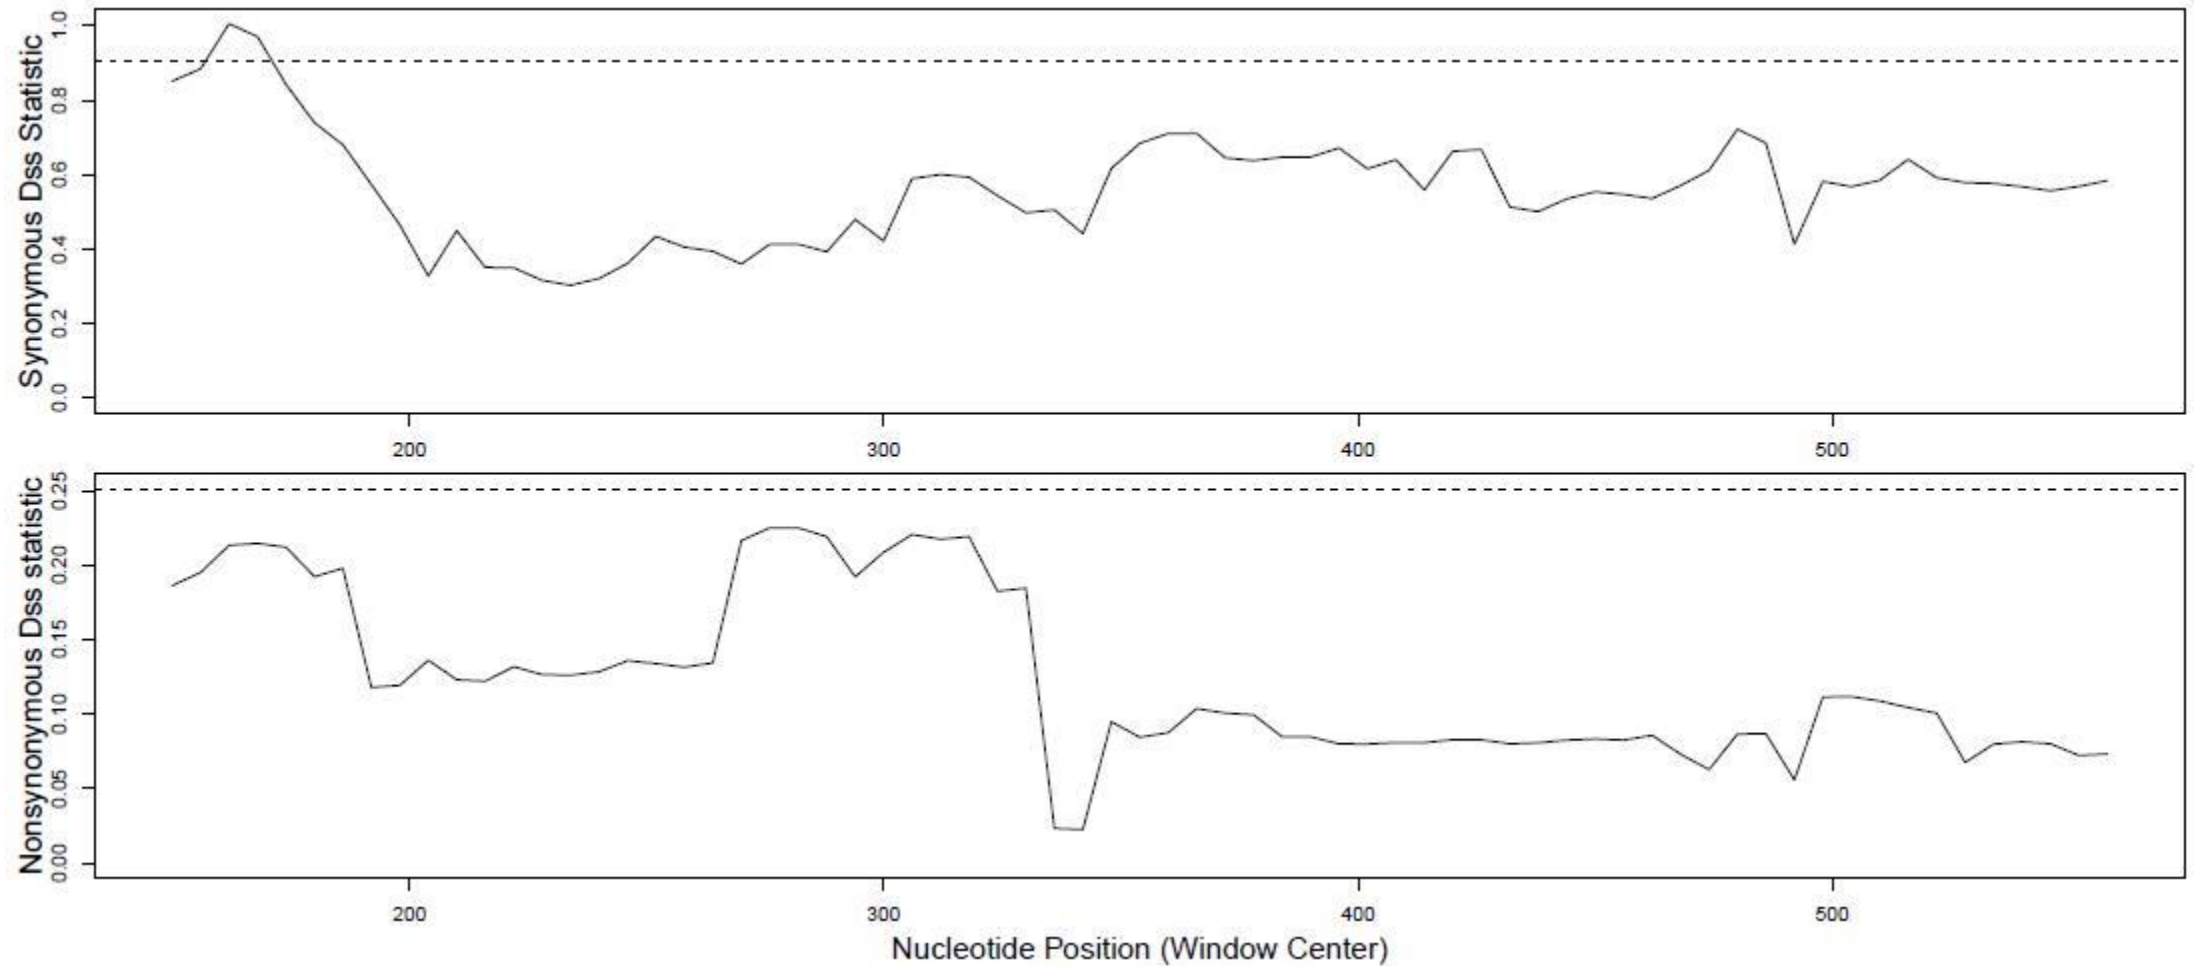

Dss statistic landscapes for synonymous and nonsynonymous changes. Dotted horizontal lines represent the 95% significance level for each test, from a parametric bootstrap with 500 replicates.

(A) 25 randomly selected core genes designated as **recombinants** by PhiPack (CONTD.)

HP\_0102

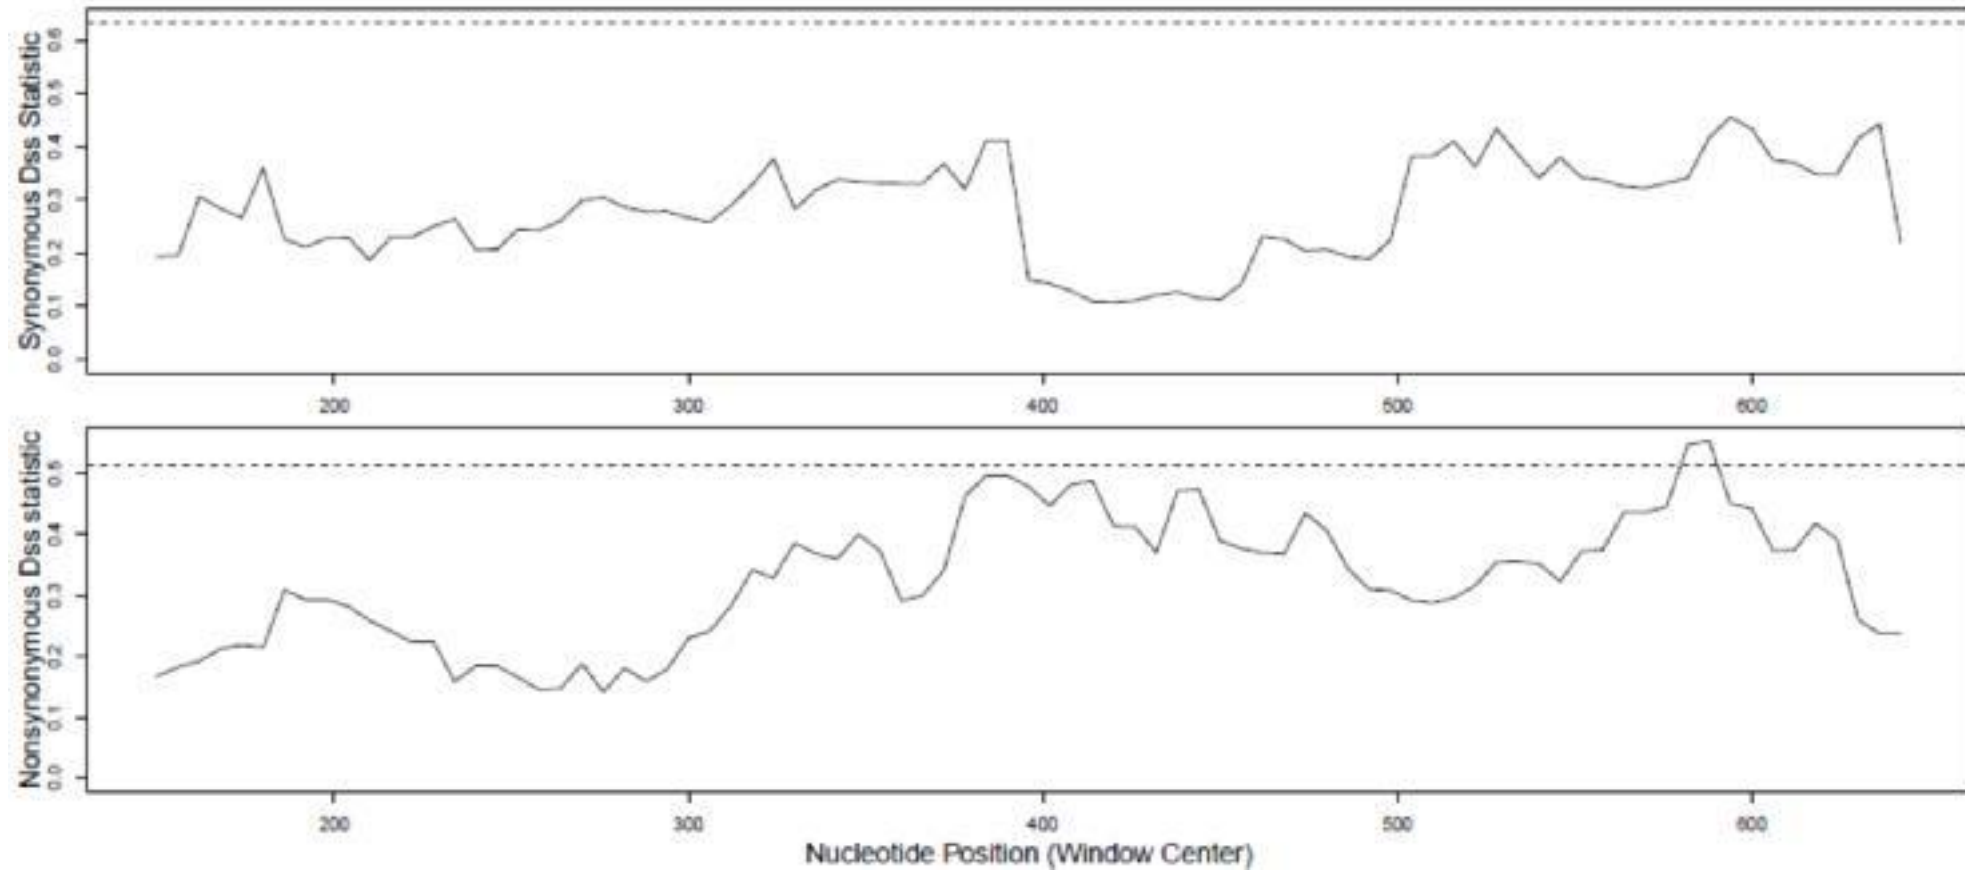

Dss statistic landscapes for synonymous and nonsynonymous changes. Dotted horizontal lines represent the 95% significance level for each test, from a parametric bootstrap with 500 replicates.

(A) 25 randomly selected core genes designated as **recombinants** by PhiPack (CONTD.)

HP\_0150

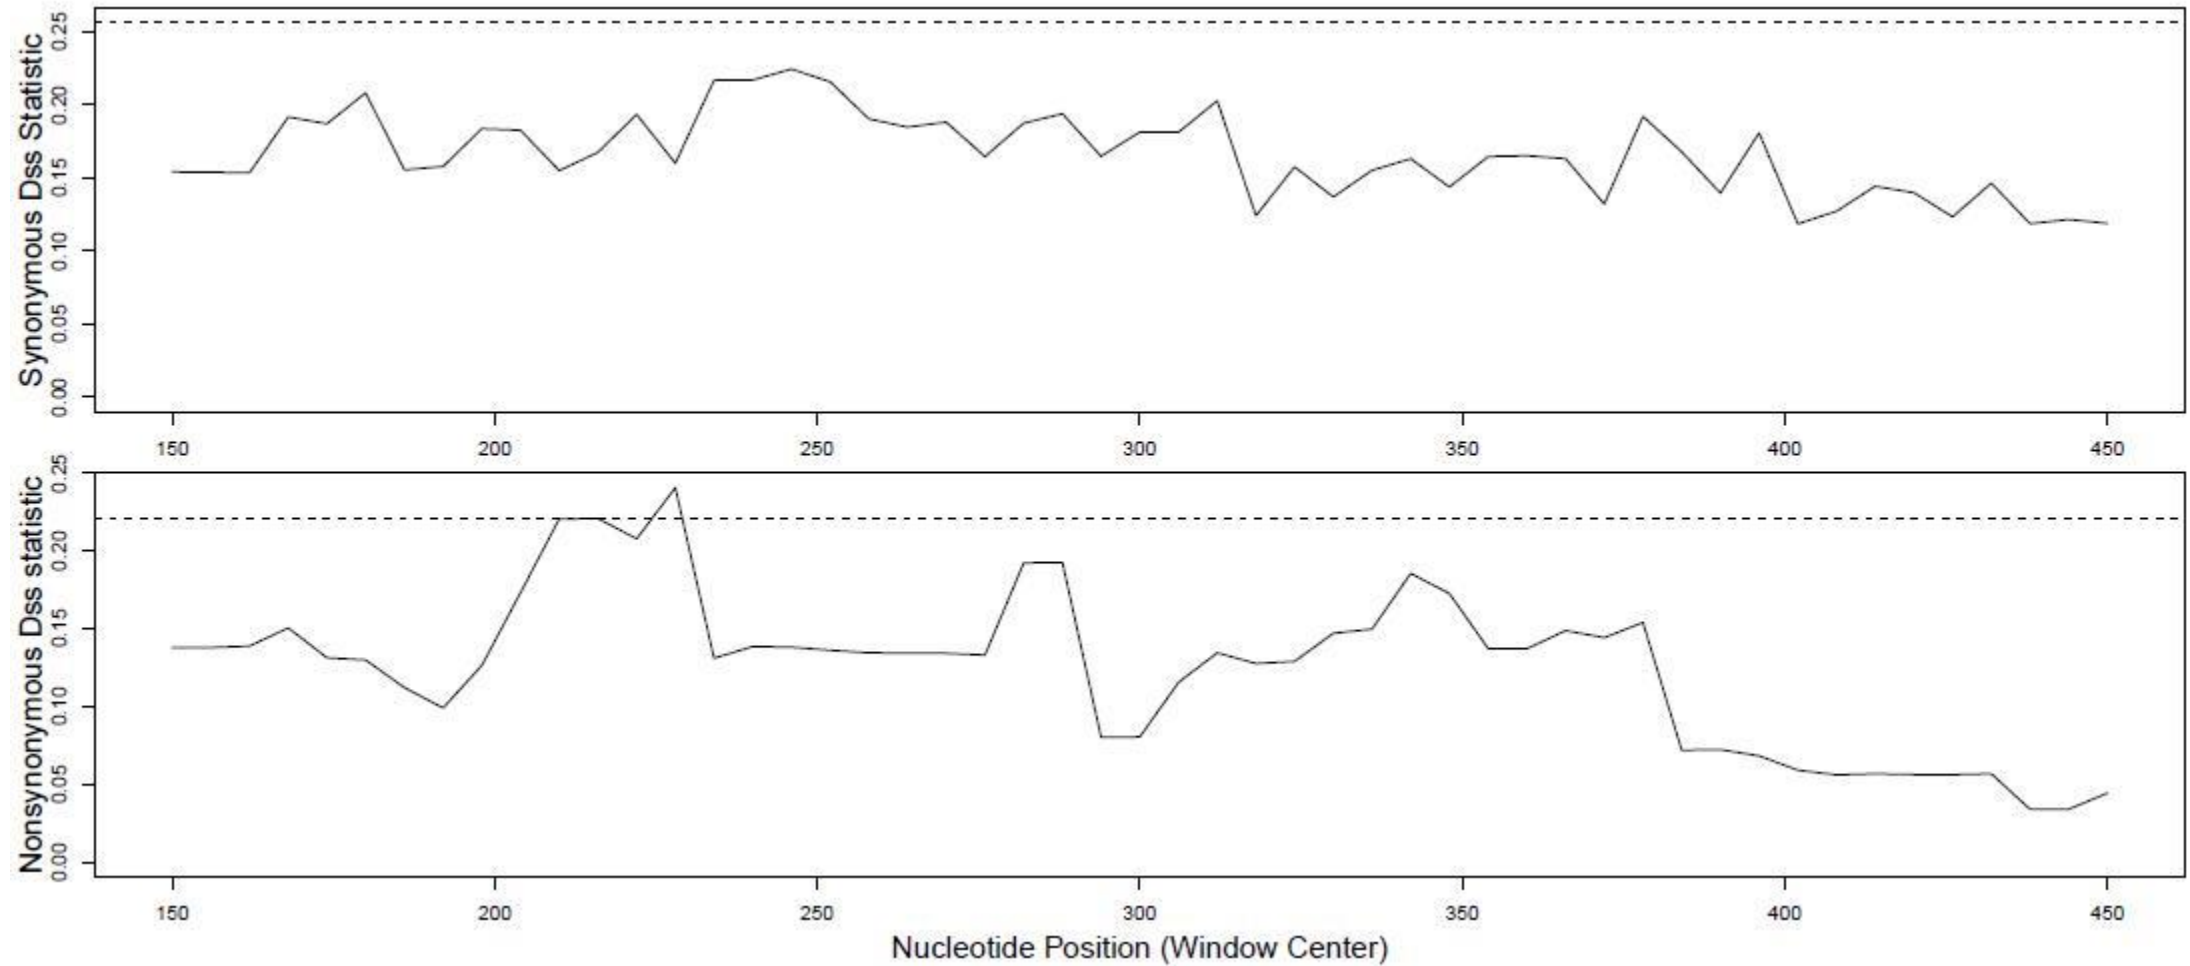

Dss statistic landscapes for synonymous and nonsynonymous changes. Dotted horizontal lines represent the 95% significance level for each test, from a parametric bootstrap with 500 replicates.

(A) 25 randomly selected core genes designated as **recombinants** by PhiPack (CONTD.)

HP\_0214

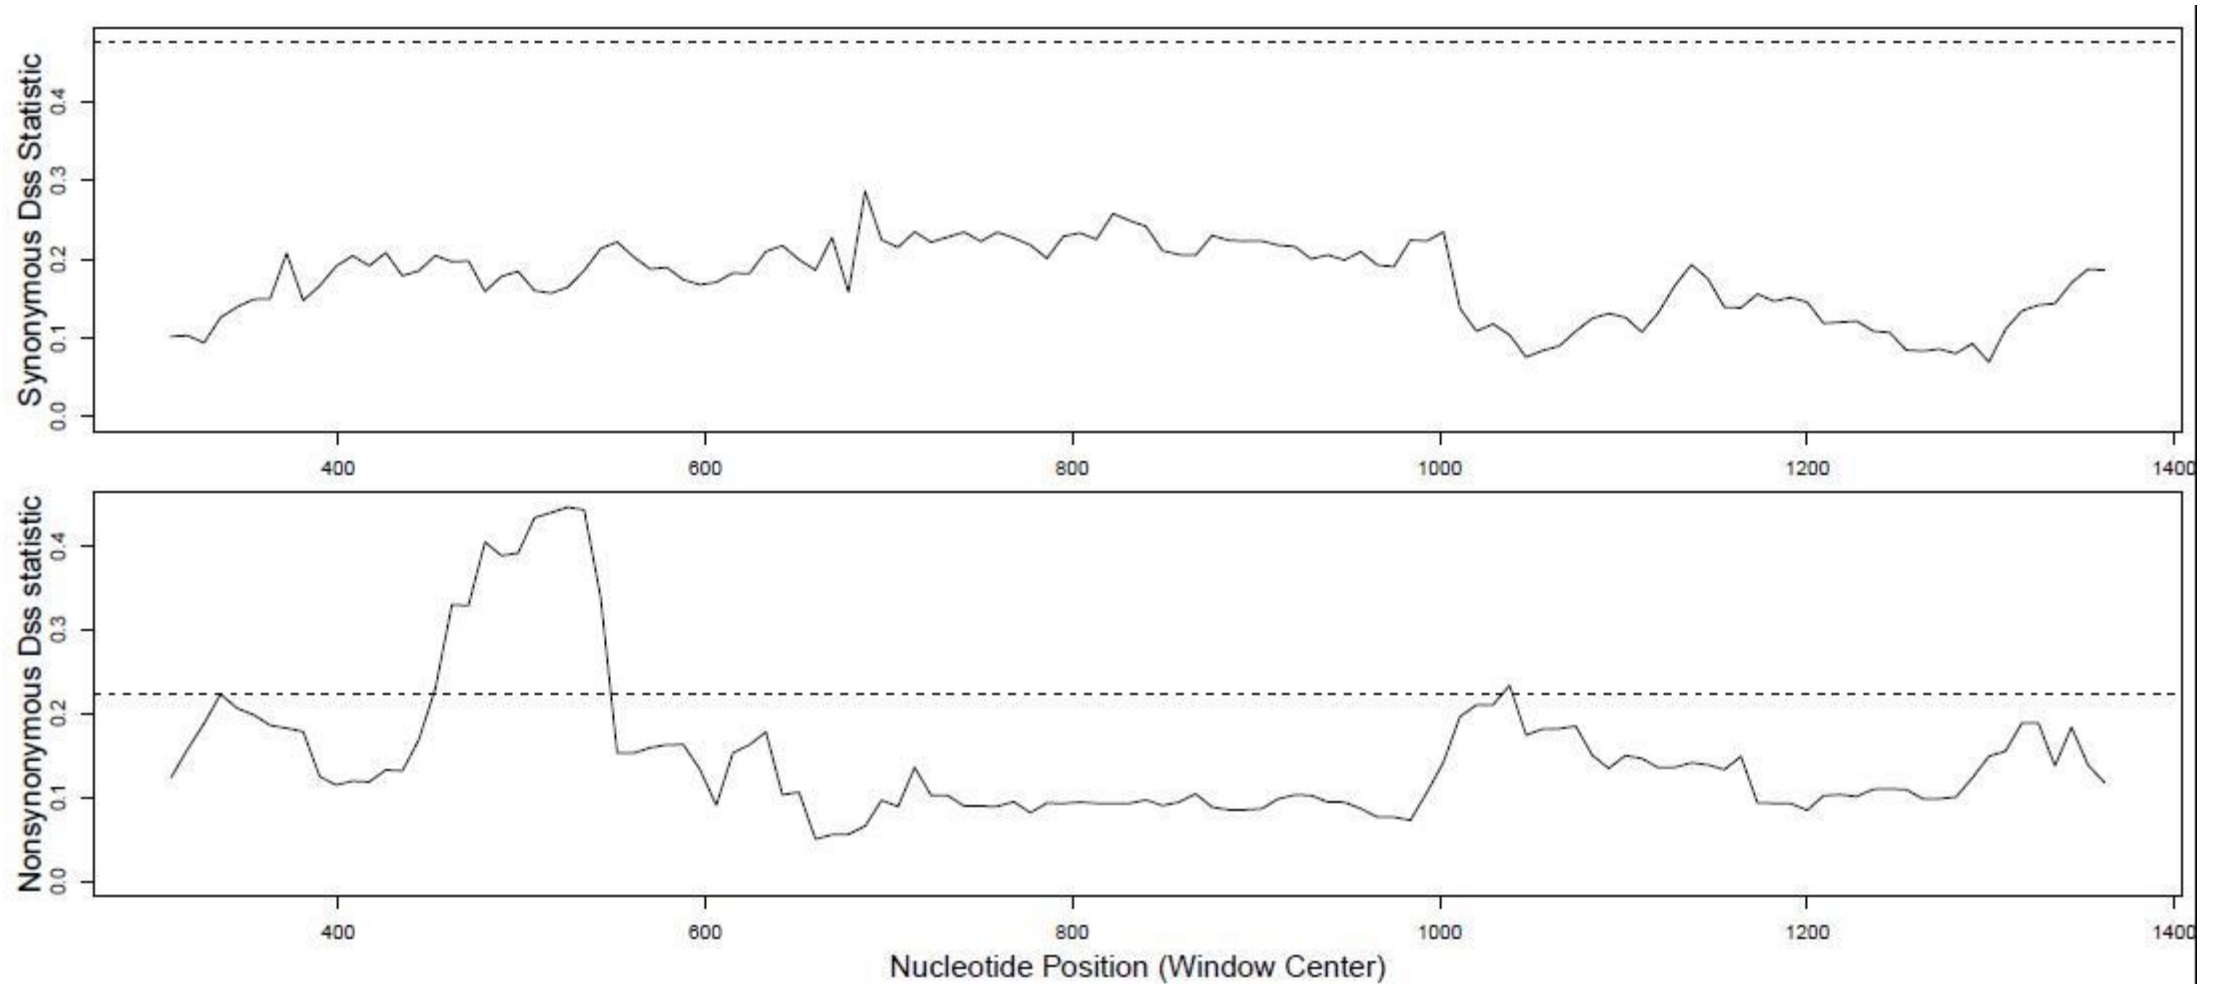

Dss statistic landscapes for synonymous and nonsynonymous changes. Dotted horizontal lines represent the 95% significance level for each test, from a parametric bootstrap with 500 replicates.

(A) 25 randomly selected core genes designated as **recombinants** by PhiPack (CONTD.)

HP\_0298

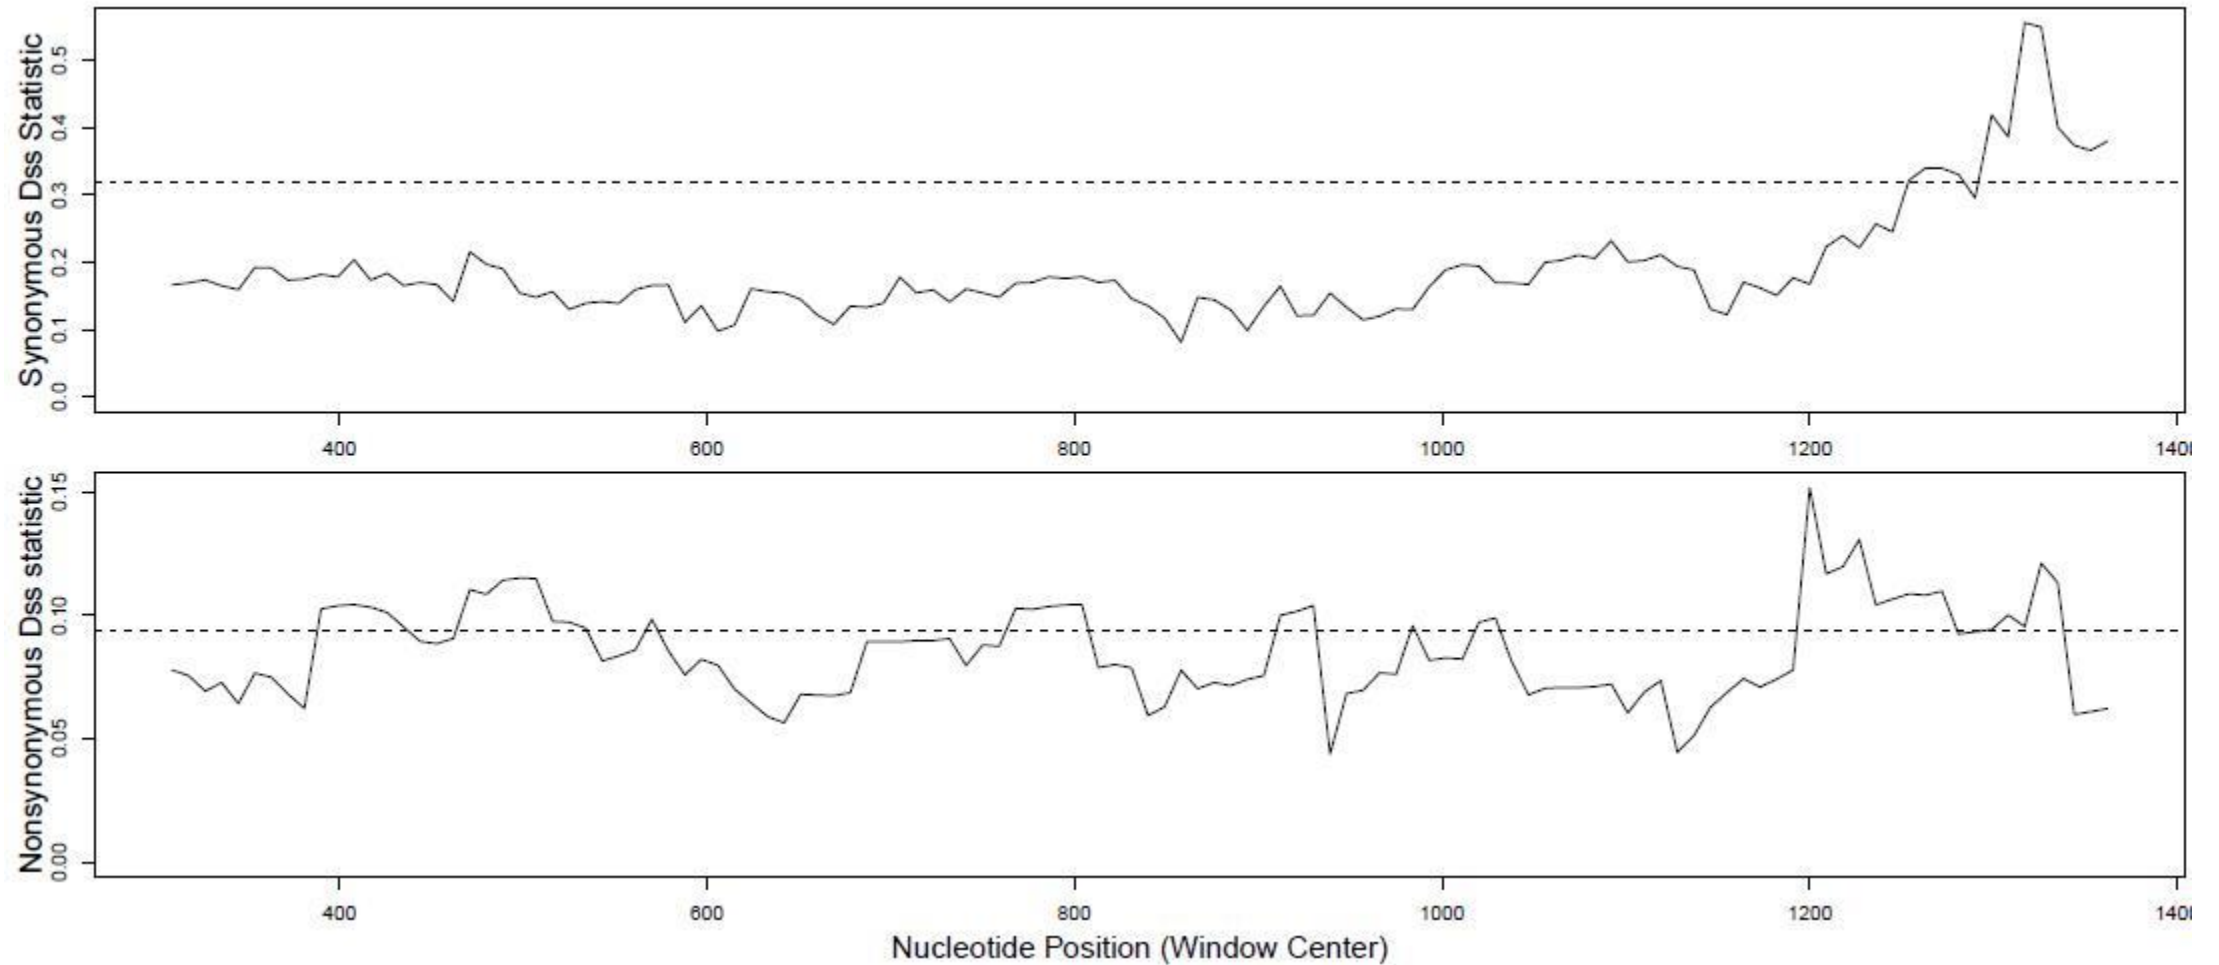

Dss statistic landscapes for synonymous and nonsynonymous changes. Dotted horizontal lines represent the 95% significance level for each test, from a parametric bootstrap with 500 replicates.

(A) 25 randomly selected core genes designated as **recombinants** by PhiPack (CONTD.)

HP\_0352

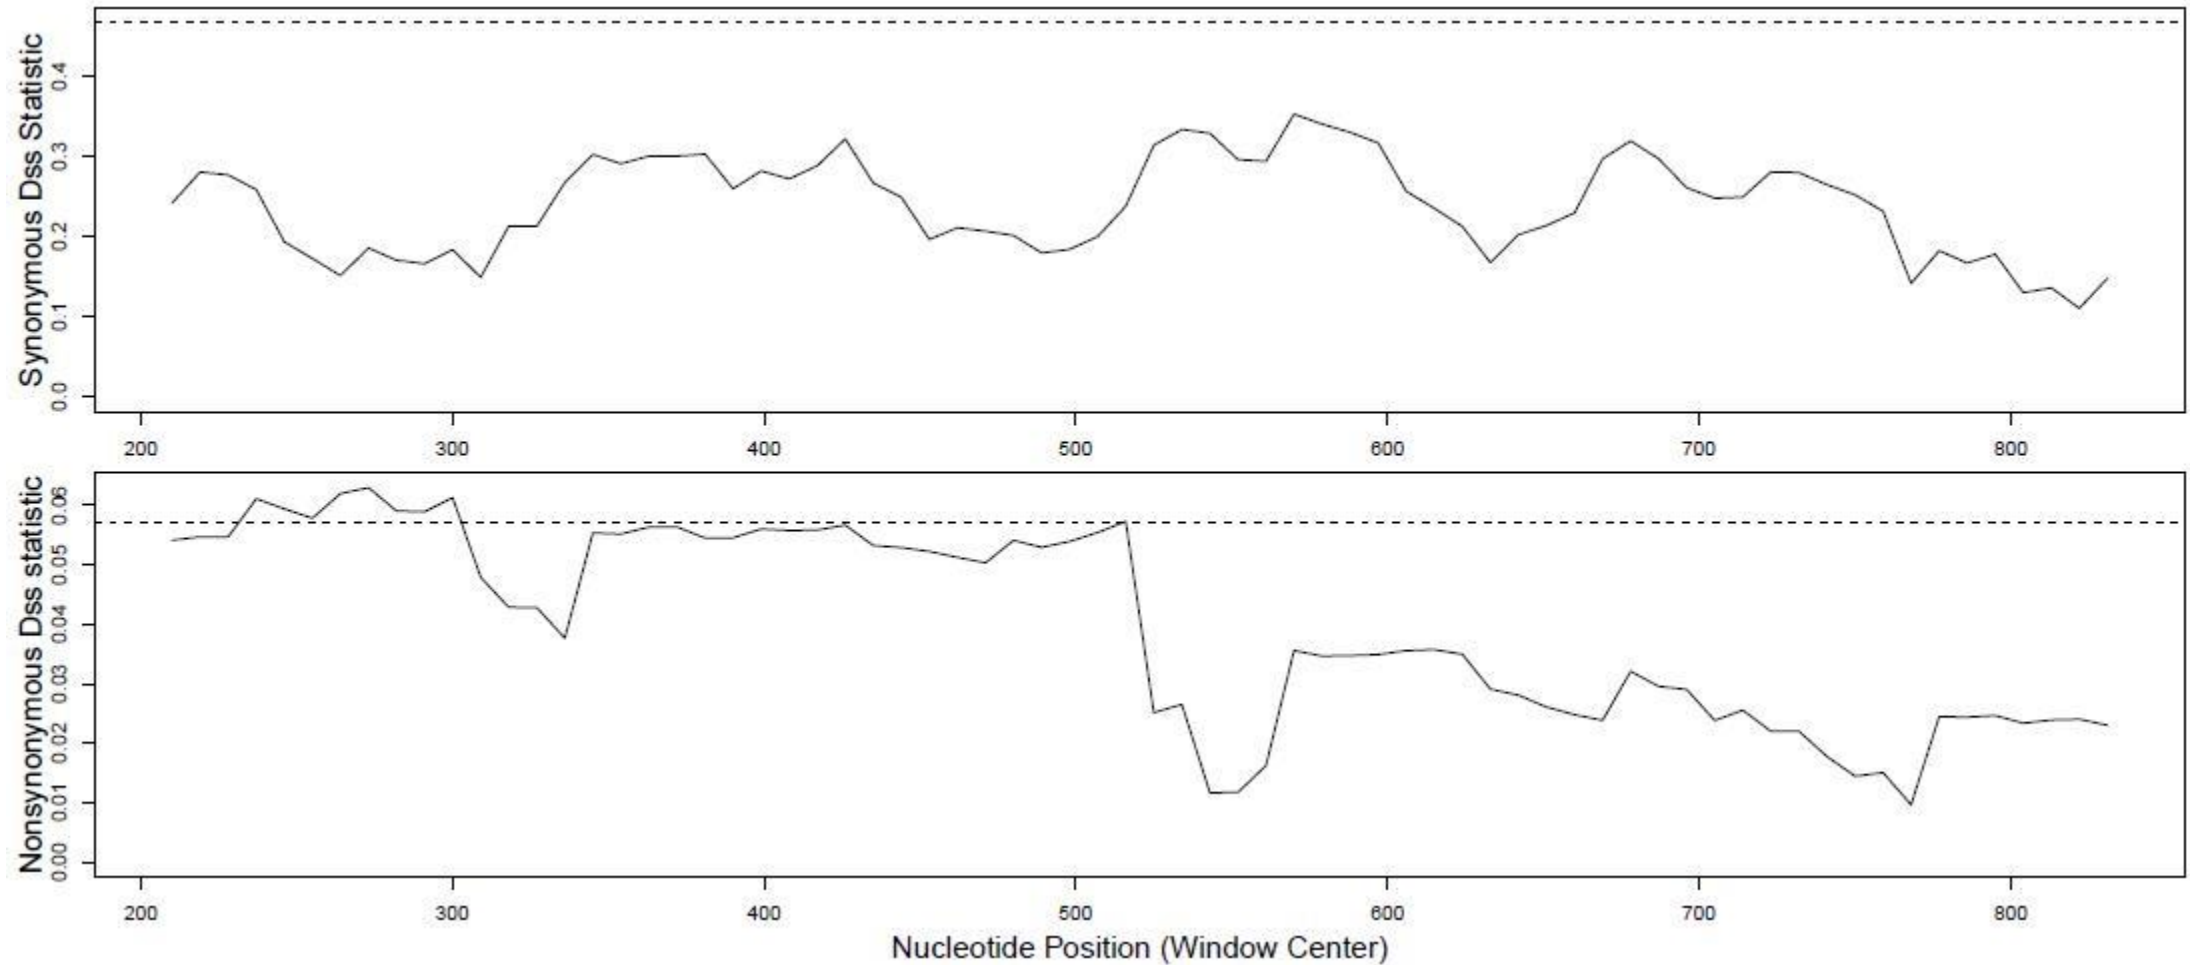

Dss statistic landscapes for synonymous and nonsynonymous changes. Dotted horizontal lines represent the 95% significance level for each test, from a parametric bootstrap with 500 replicates.



(A) 25 randomly selected core genes designated as **recombinants** by PhiPack (CONTD.)

HP\_0393

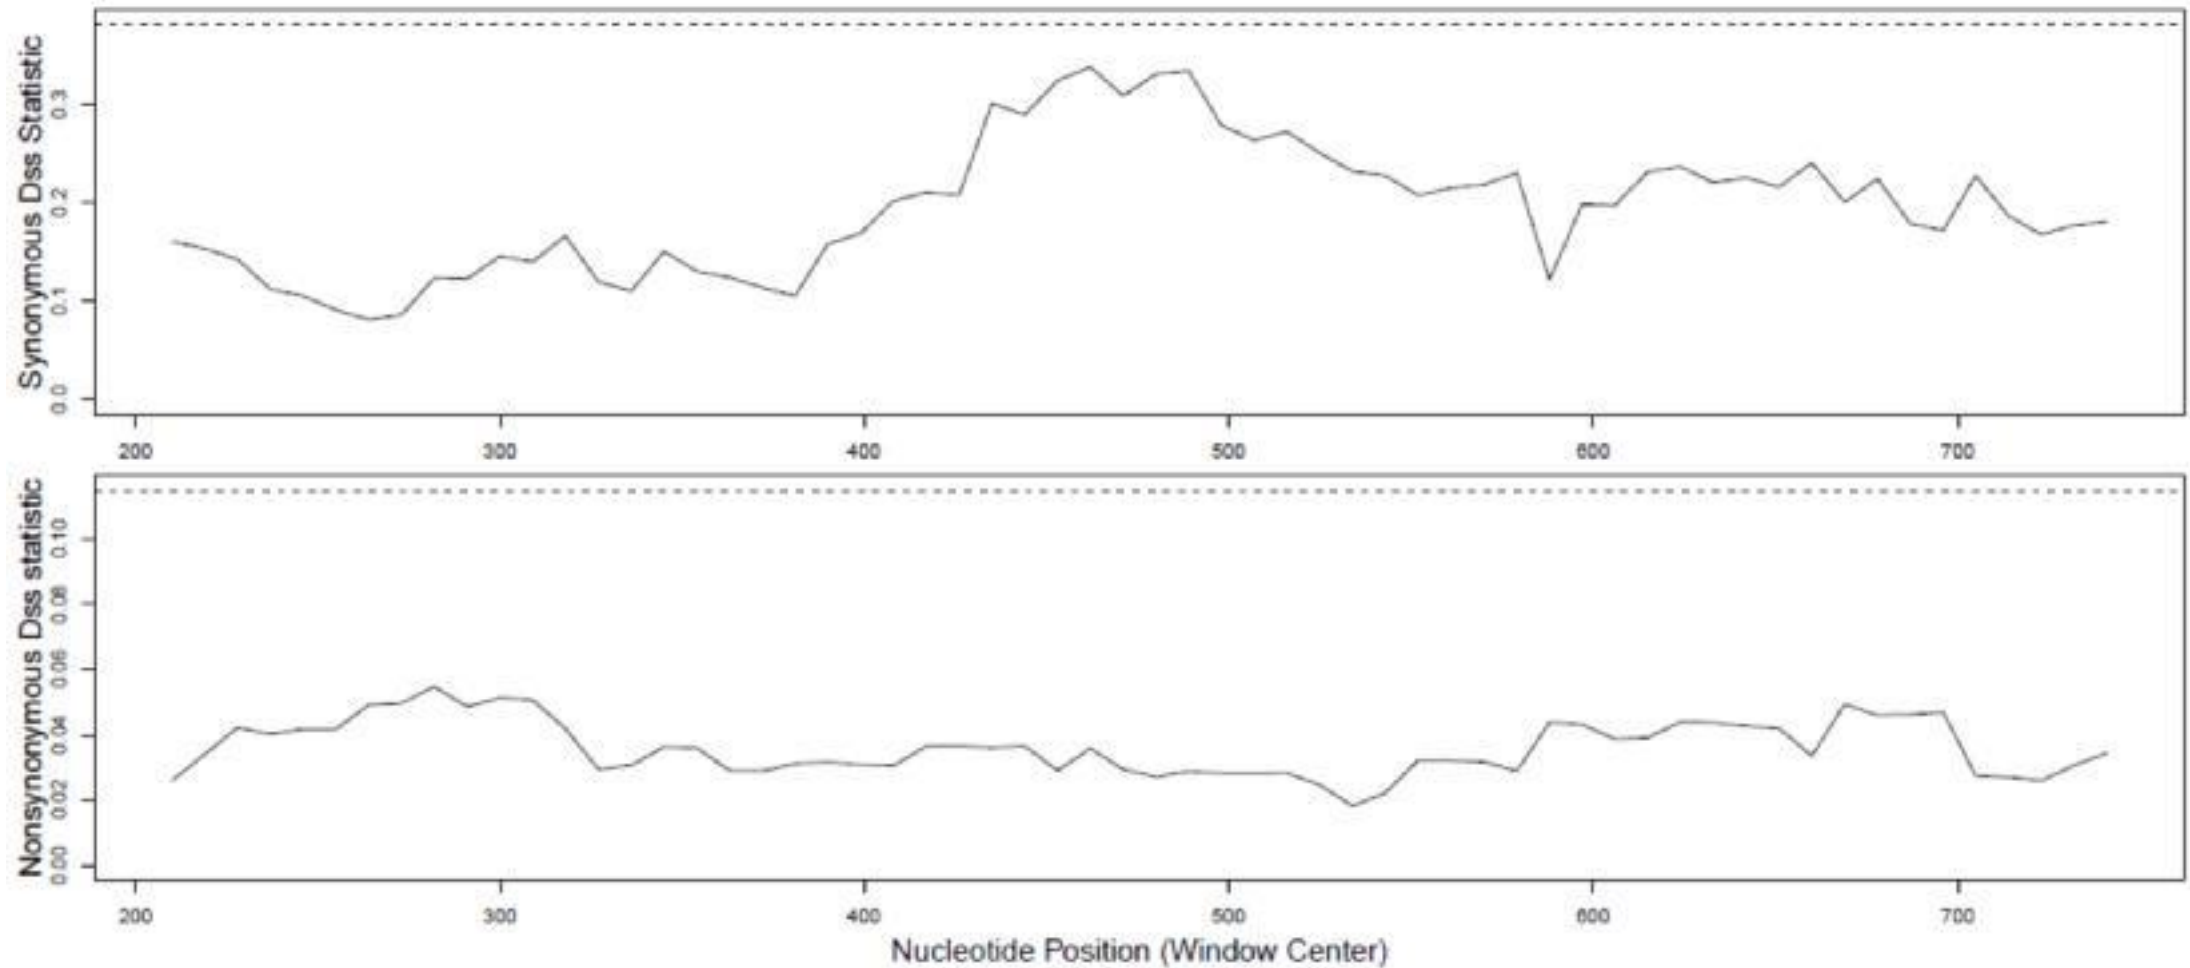

Dss statistic landscapes for synonymous and nonsynonymous changes. Dotted horizontal lines represent the 95% significance level for each test, from a parametric bootstrap with 500 replicates.

(A) 25 randomly selected core genes designated as **recombinants** by PhiPack (CONTD.)

HP\_0493

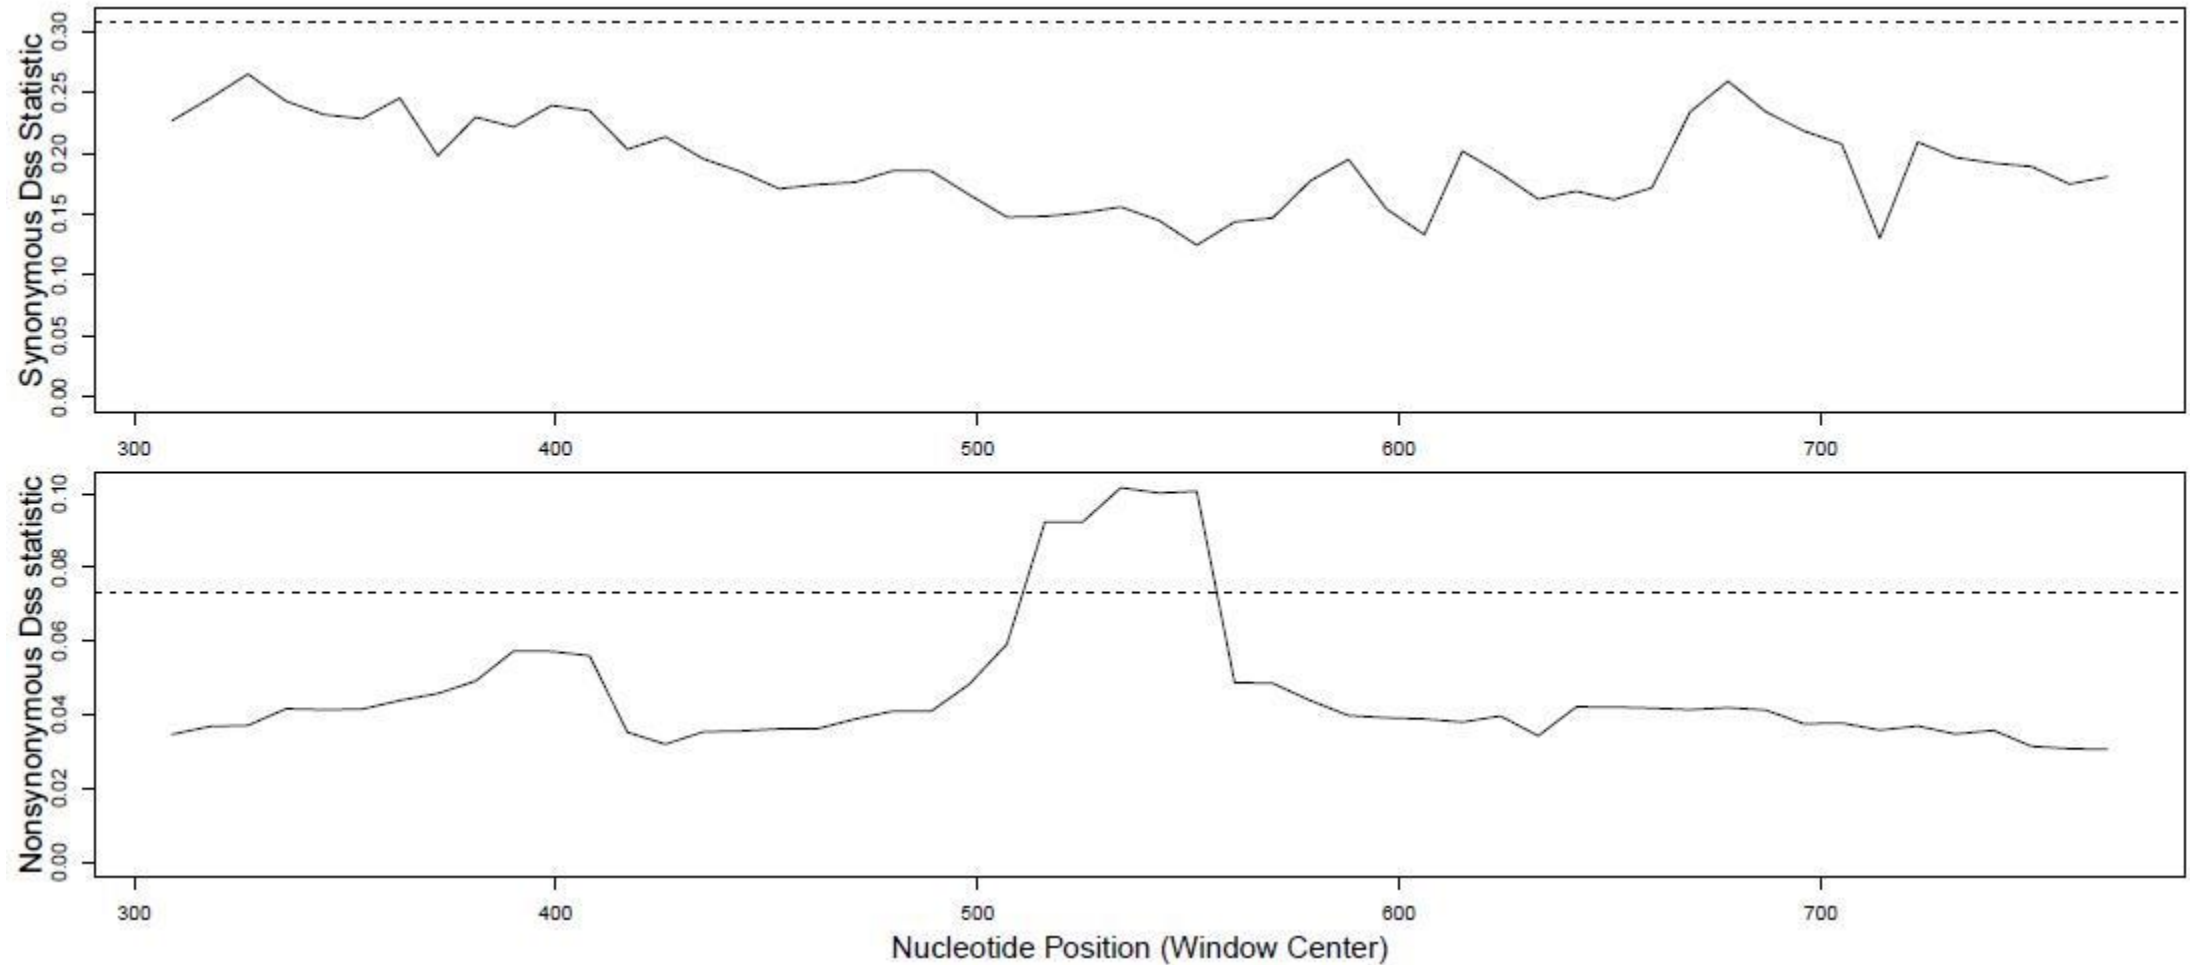

Dss statistic landscapes for synonymous and nonsynonymous changes. Dotted horizontal lines represent the 95% significance level for each test, from a parametric bootstrap with 500 replicates.

(A) 25 randomly selected core genes designated as **recombinants** by PhiPack (CONTD.)

HP\_0563

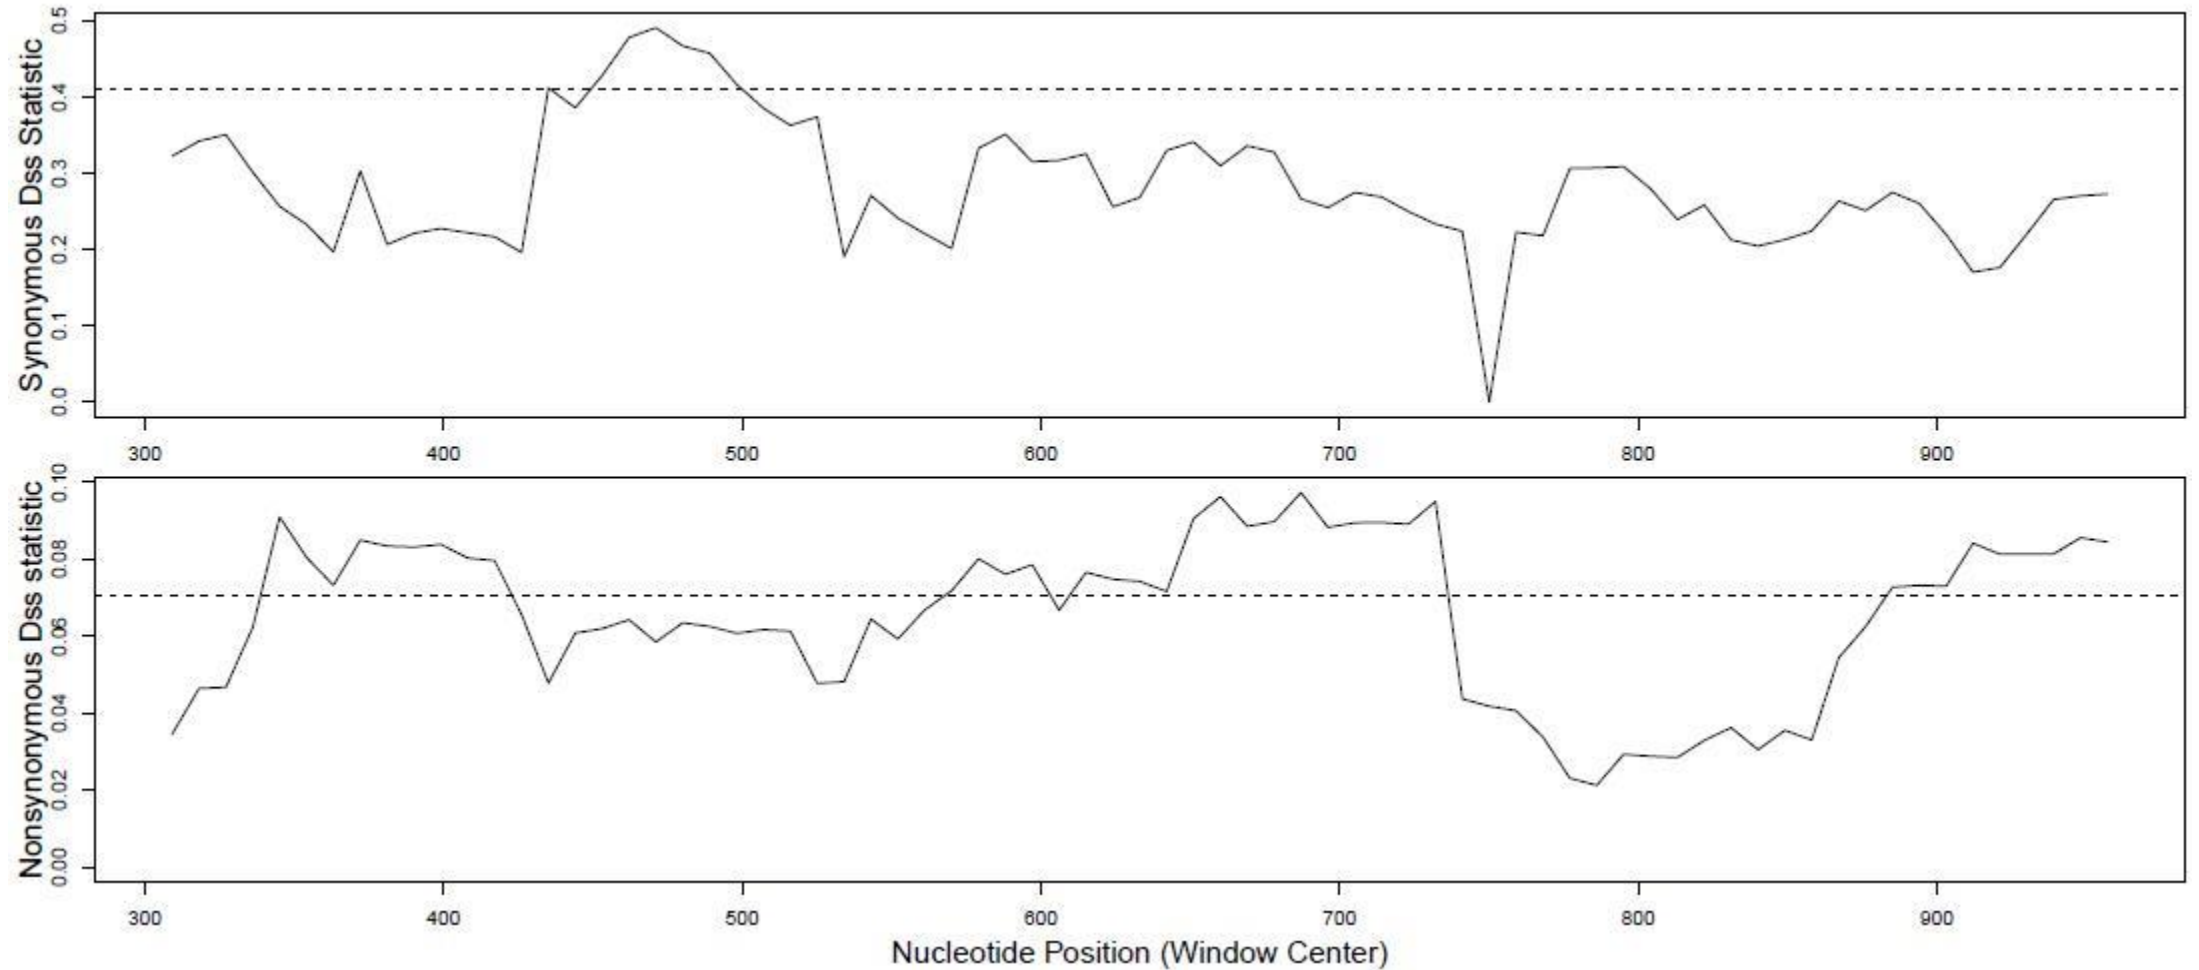

Dss statistic landscapes for synonymous and nonsynonymous changes. Dotted horizontal lines represent the 95% significance level for each test, from a parametric bootstrap with 500 replicates.

(A) 25 randomly selected core genes designated as **recombinants** by PhiPack (CONTD.)

HP\_0603

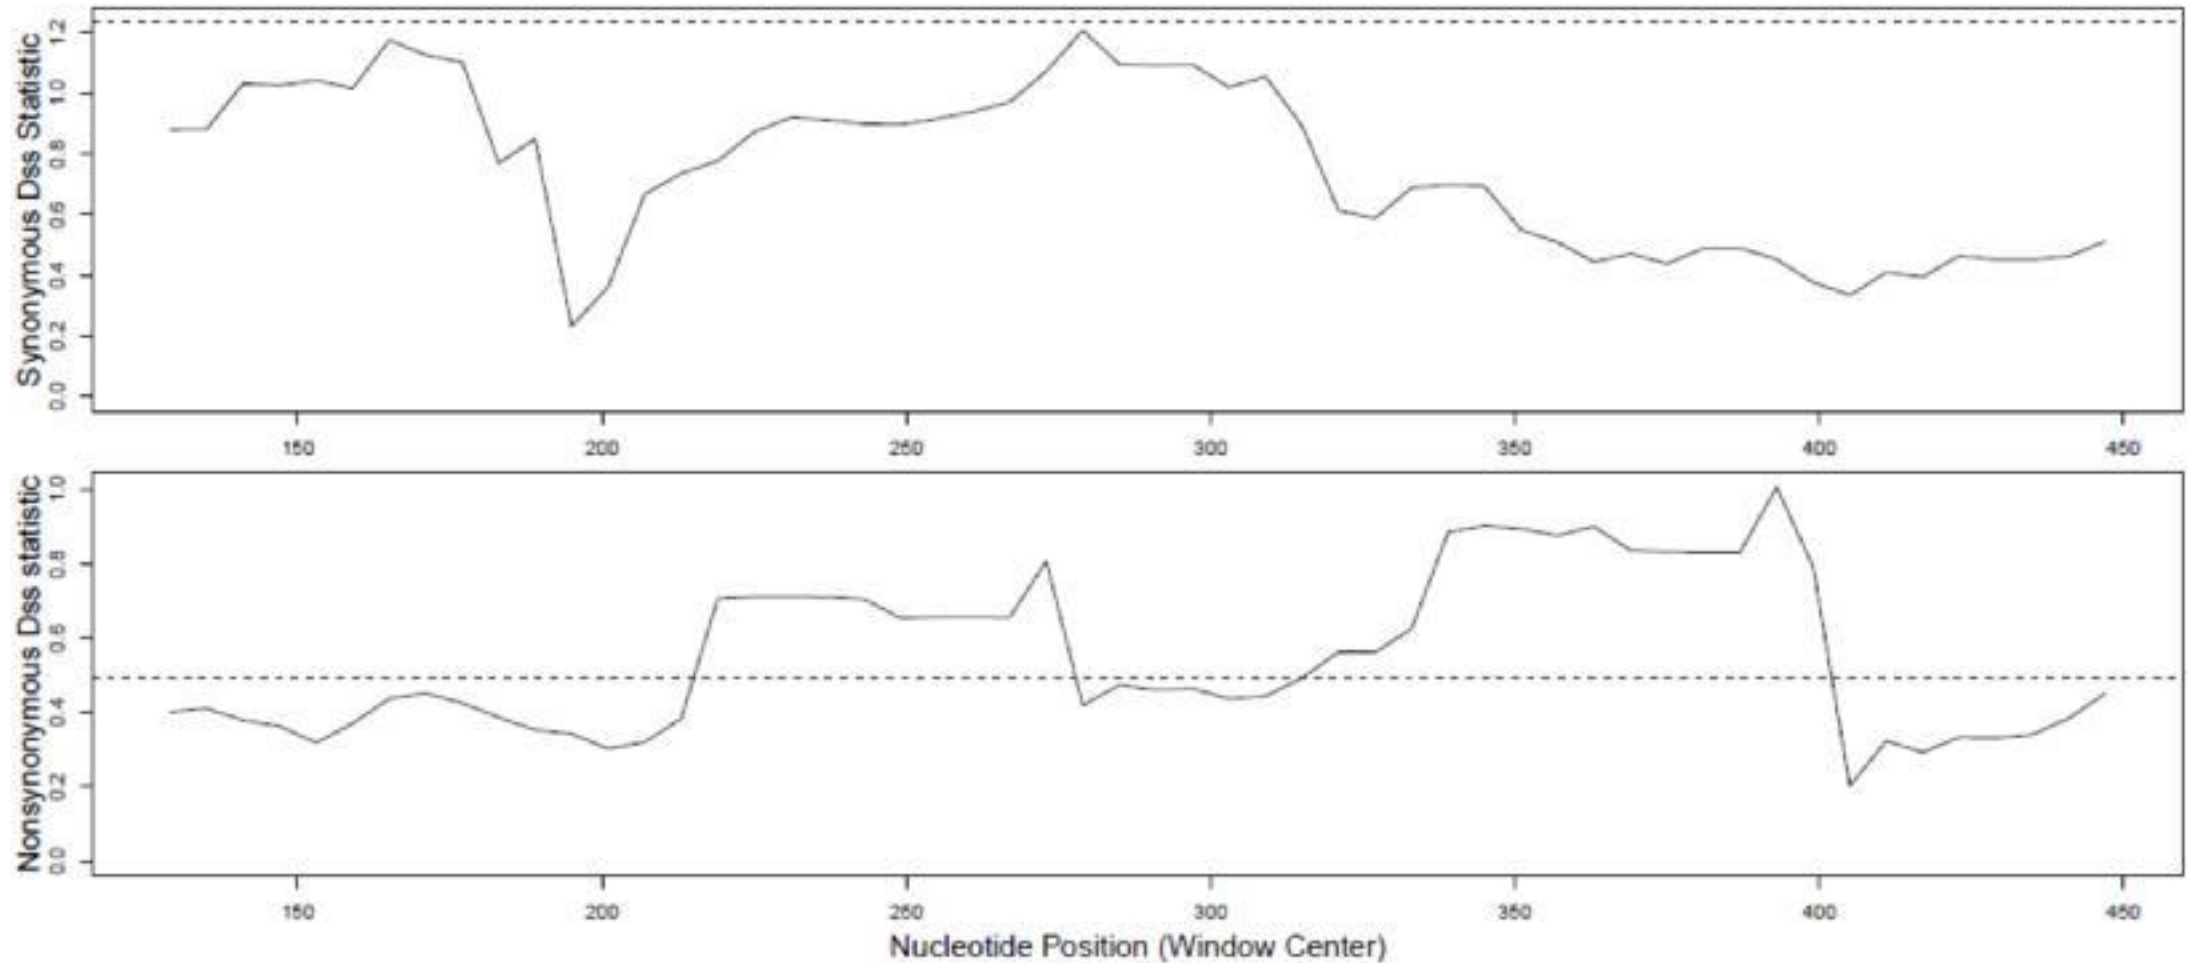

Dss statistic landscapes for synonymous and nonsynonymous changes. Dotted horizontal lines represent the 95% significance level for each test, from a parametric bootstrap with 500 replicates.

(A) 25 randomly selected core genes designated as **recombinants** by PhiPack (CONTD.)

HP\_0630

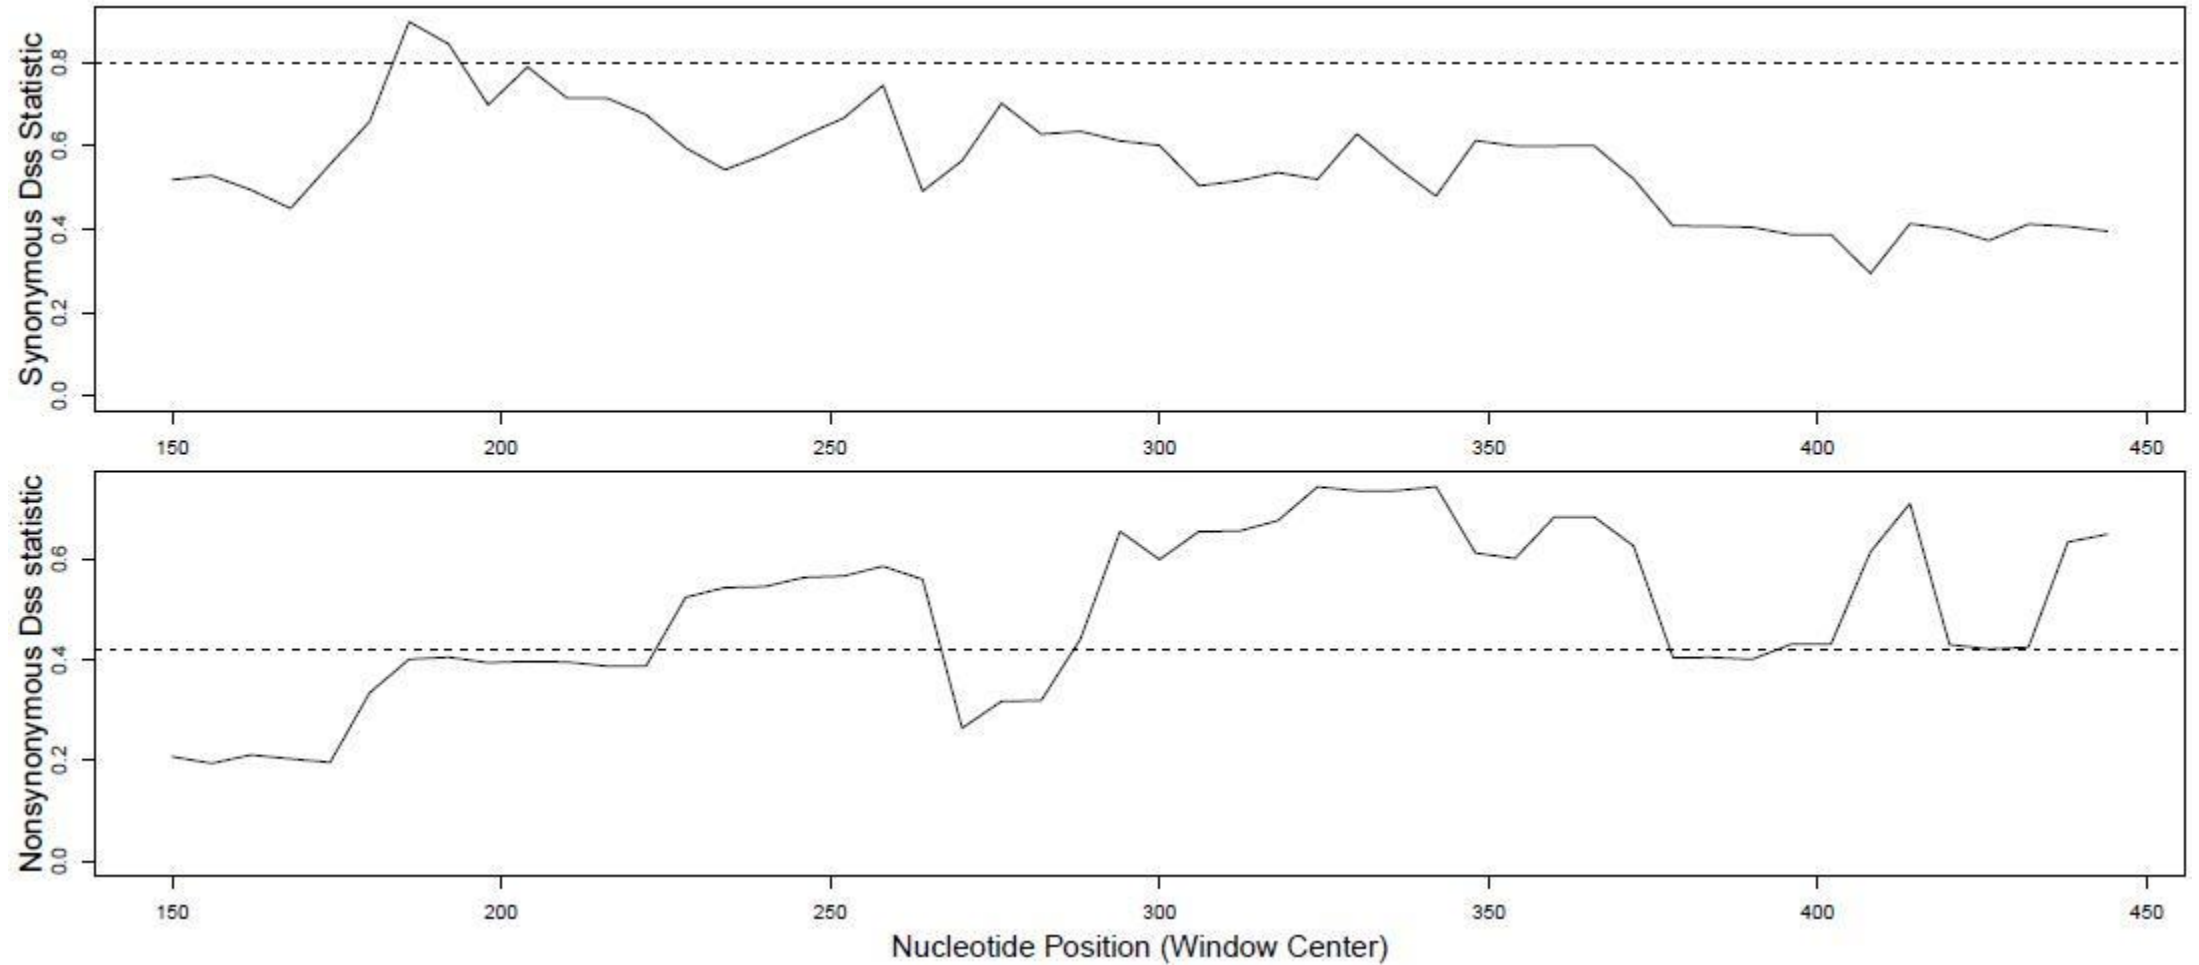

Dss statistic landscapes for synonymous and nonsynonymous changes. Dotted horizontal lines represent the 95% significance level for each test, from a parametric bootstrap with 500 replicates.

(A) 25 randomly selected core genes designated as **recombinants** by PhiPack (CONTD.)

HP\_0683

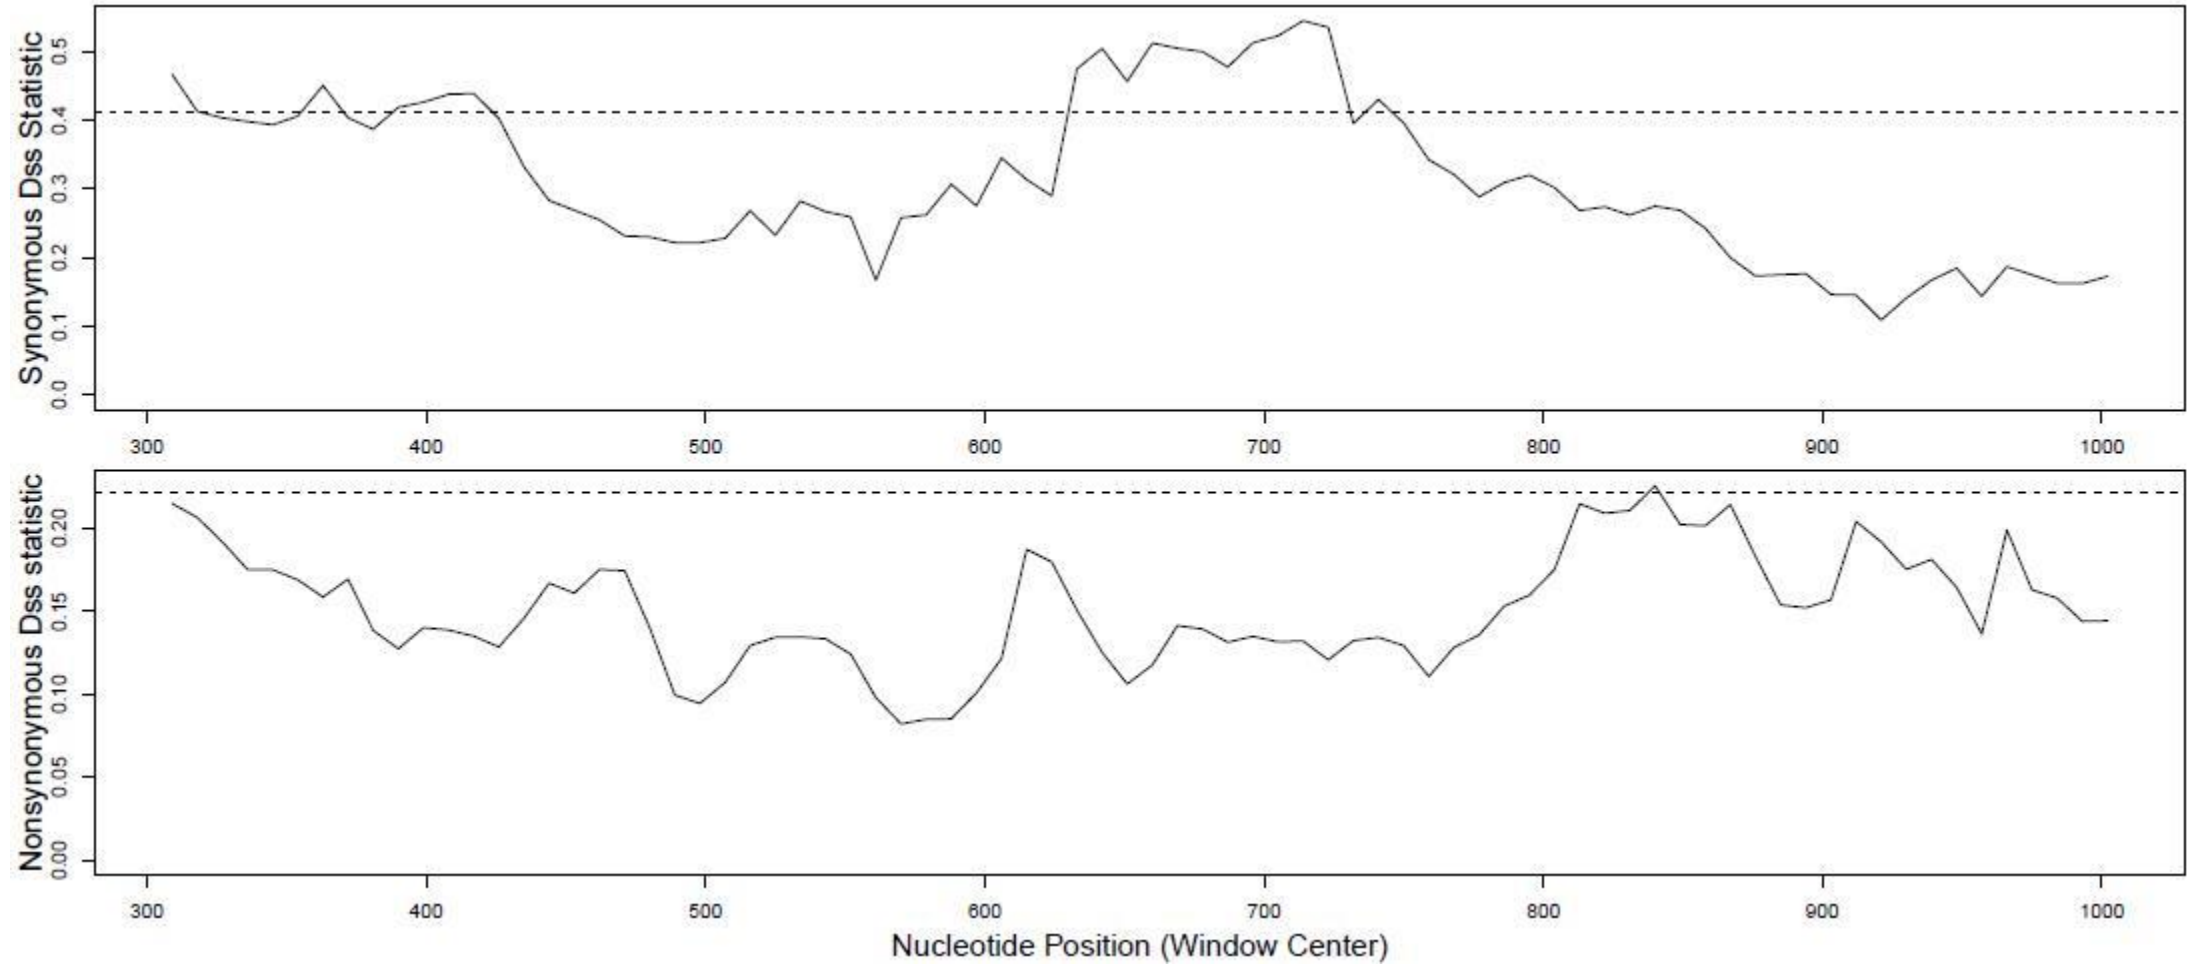

Dss statistic landscapes for synonymous and nonsynonymous changes. Dotted horizontal lines represent the 95% significance level for each test, from a parametric bootstrap with 500 replicates.

(A) 25 randomly selected core genes designated as **recombinants** by PhiPack (CONTD.)

HP\_0747

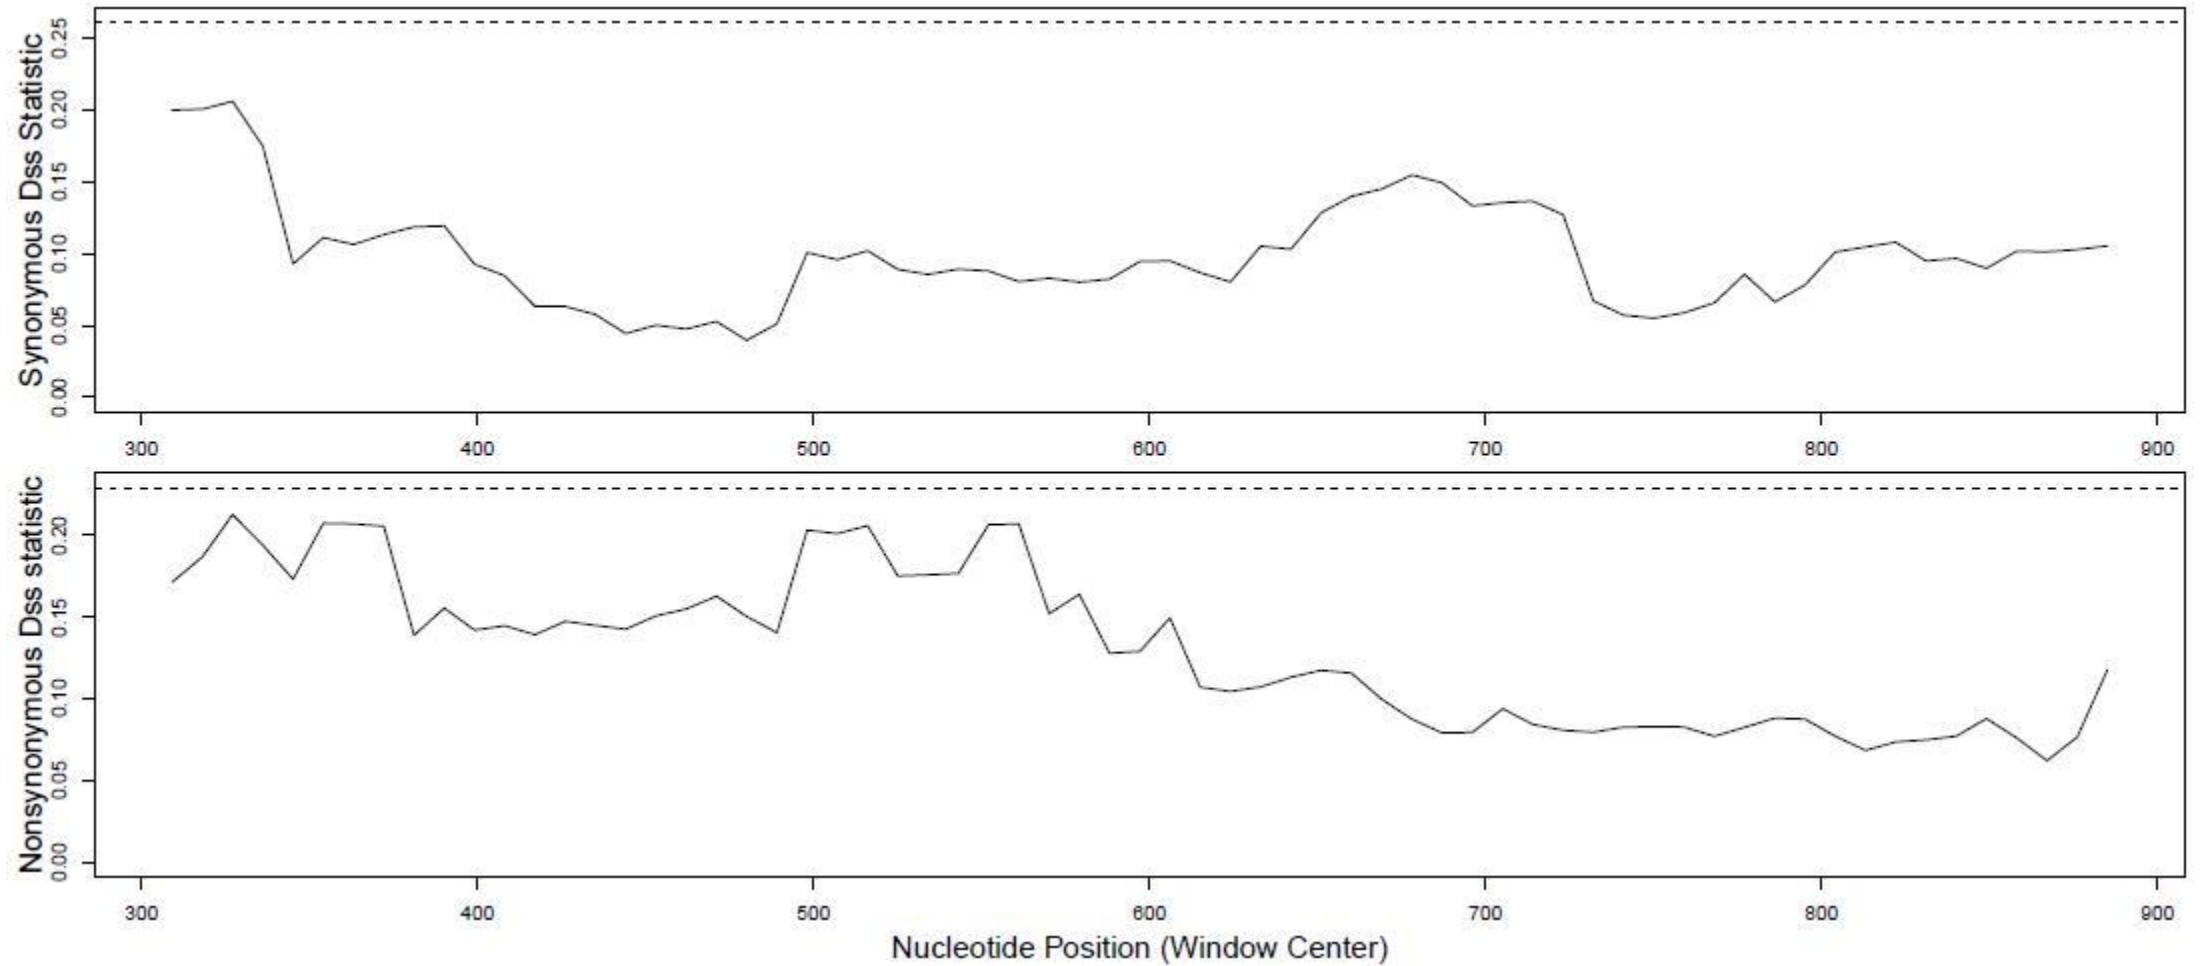

Dss statistic landscapes for synonymous and nonsynonymous changes. Dotted horizontal lines represent the 95% significance level for each test, from a parametric bootstrap with 500 replicates.

(A) 25 randomly selected core genes designated as **recombinants** by PhiPack (CONTD.)

HP\_0865

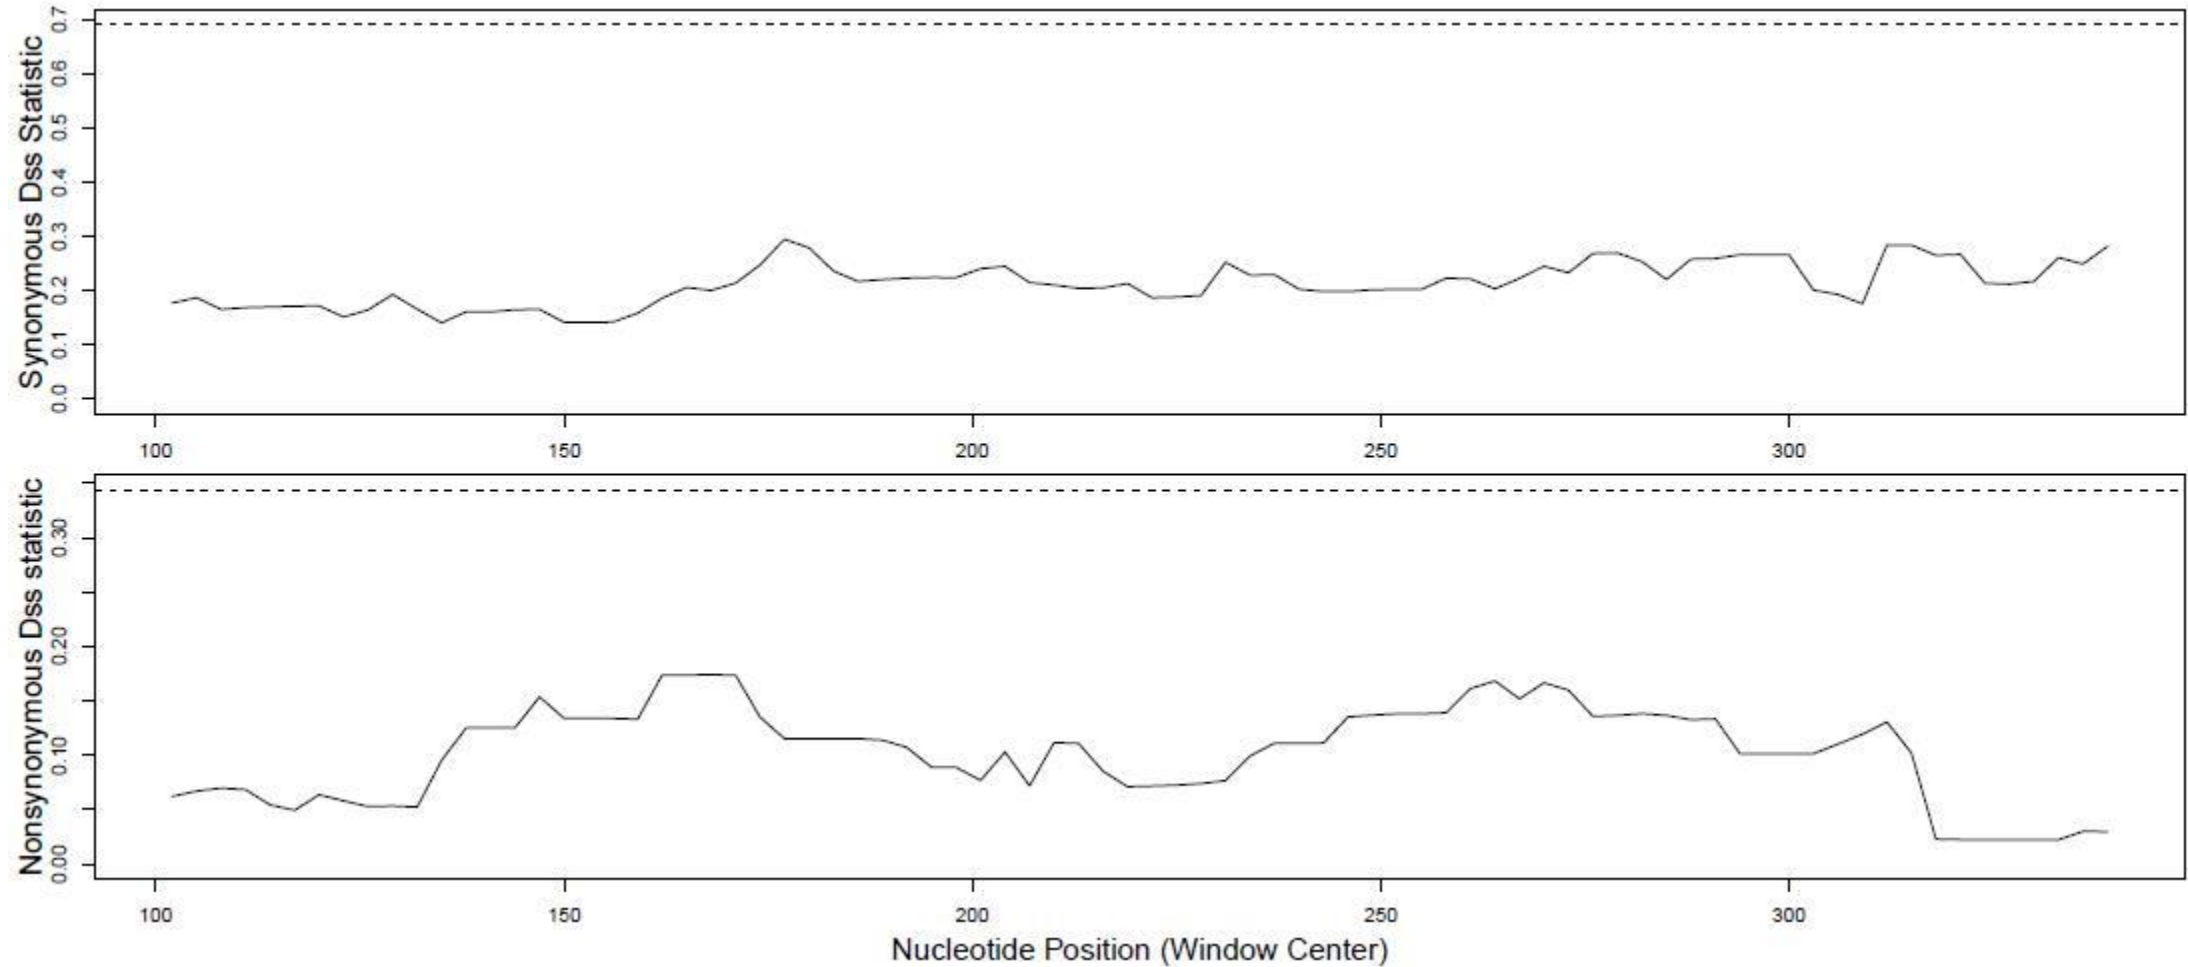

Dss statistic landscapes for synonymous and nonsynonymous changes. Dotted horizontal lines represent the 95% significance level for each test, from a parametric bootstrap with 500 replicates.



(A) 25 randomly selected core genes designated as **recombinants** by PhiPack (CONTD.)

HP\_0959

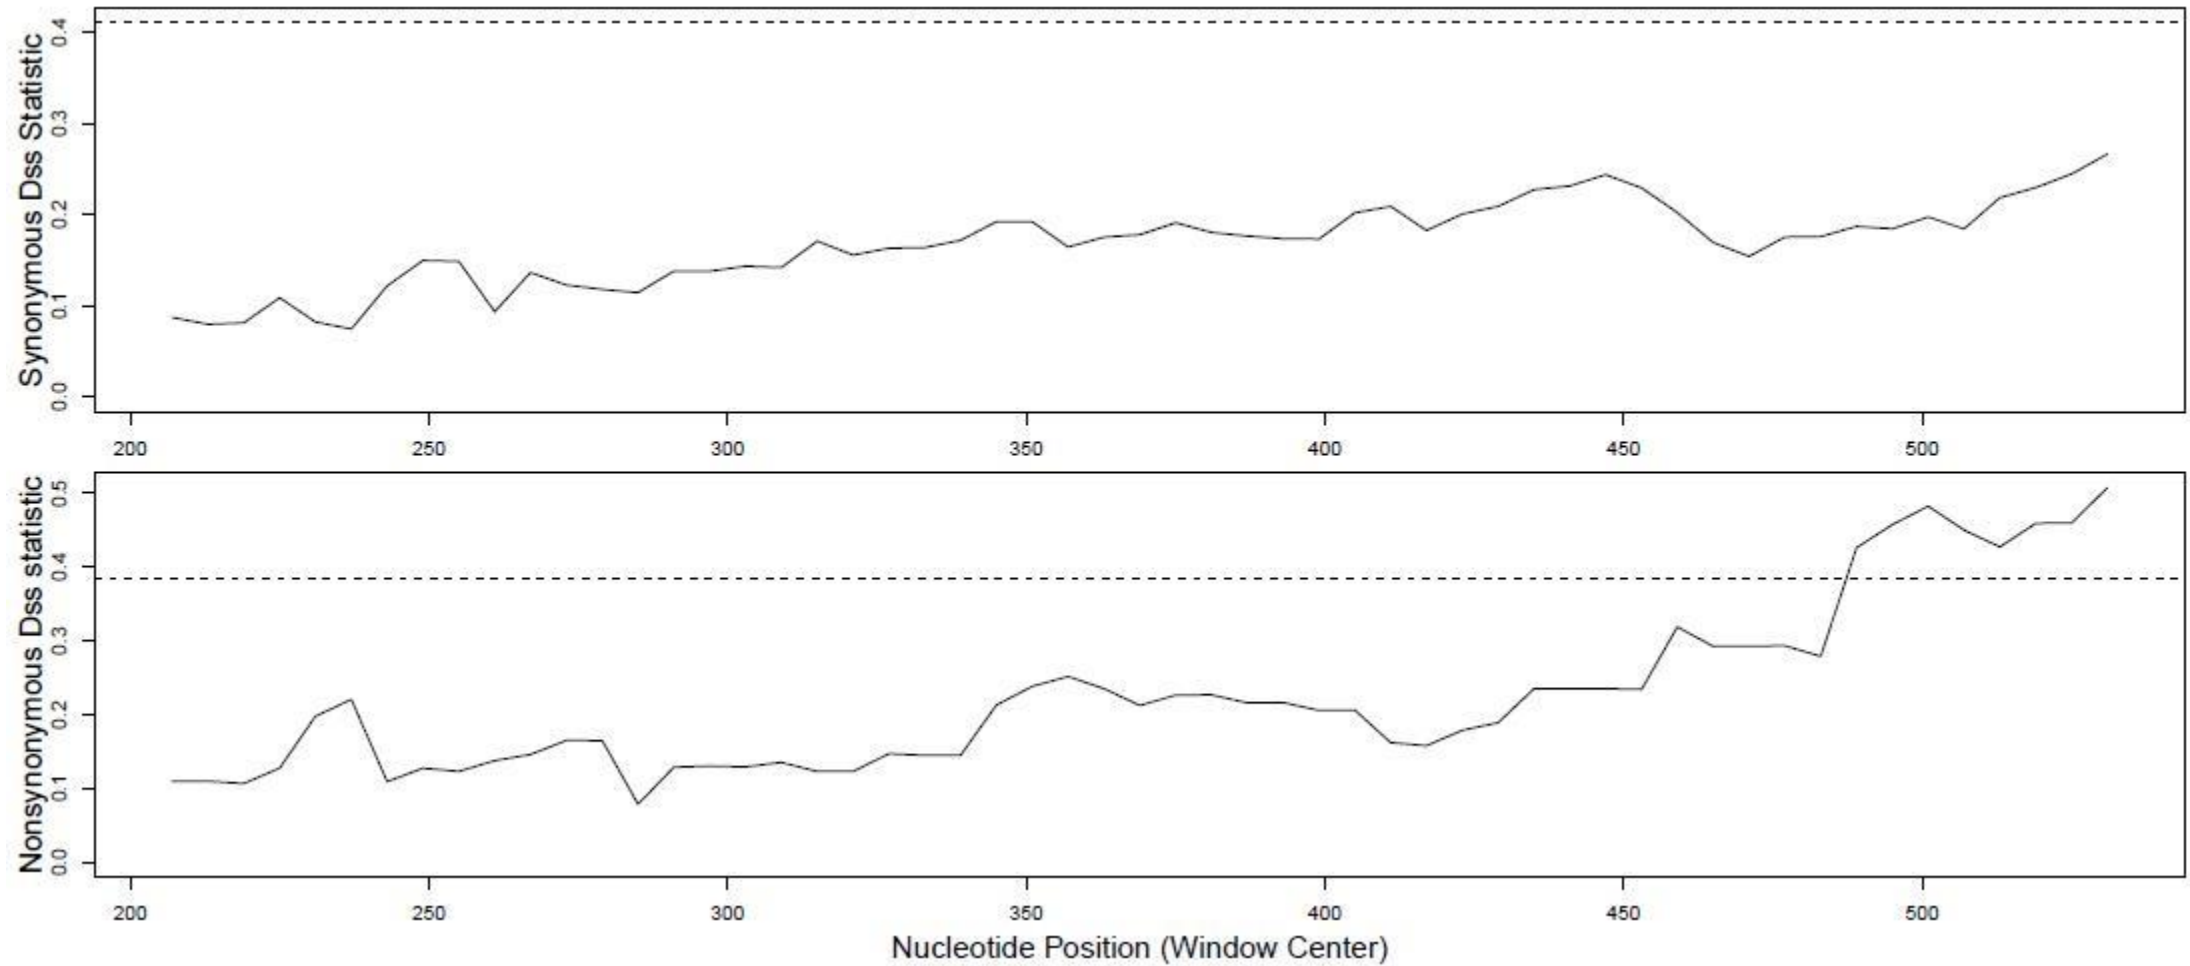

Dss statistic landscapes for synonymous and nonsynonymous changes. Dotted horizontal lines represent the 95% significance level for each test, from a parametric bootstrap with 500 replicates.

(A) 25 randomly selected core genes designated as **recombinants** by PhiPack (CONTD.)

HP\_1014

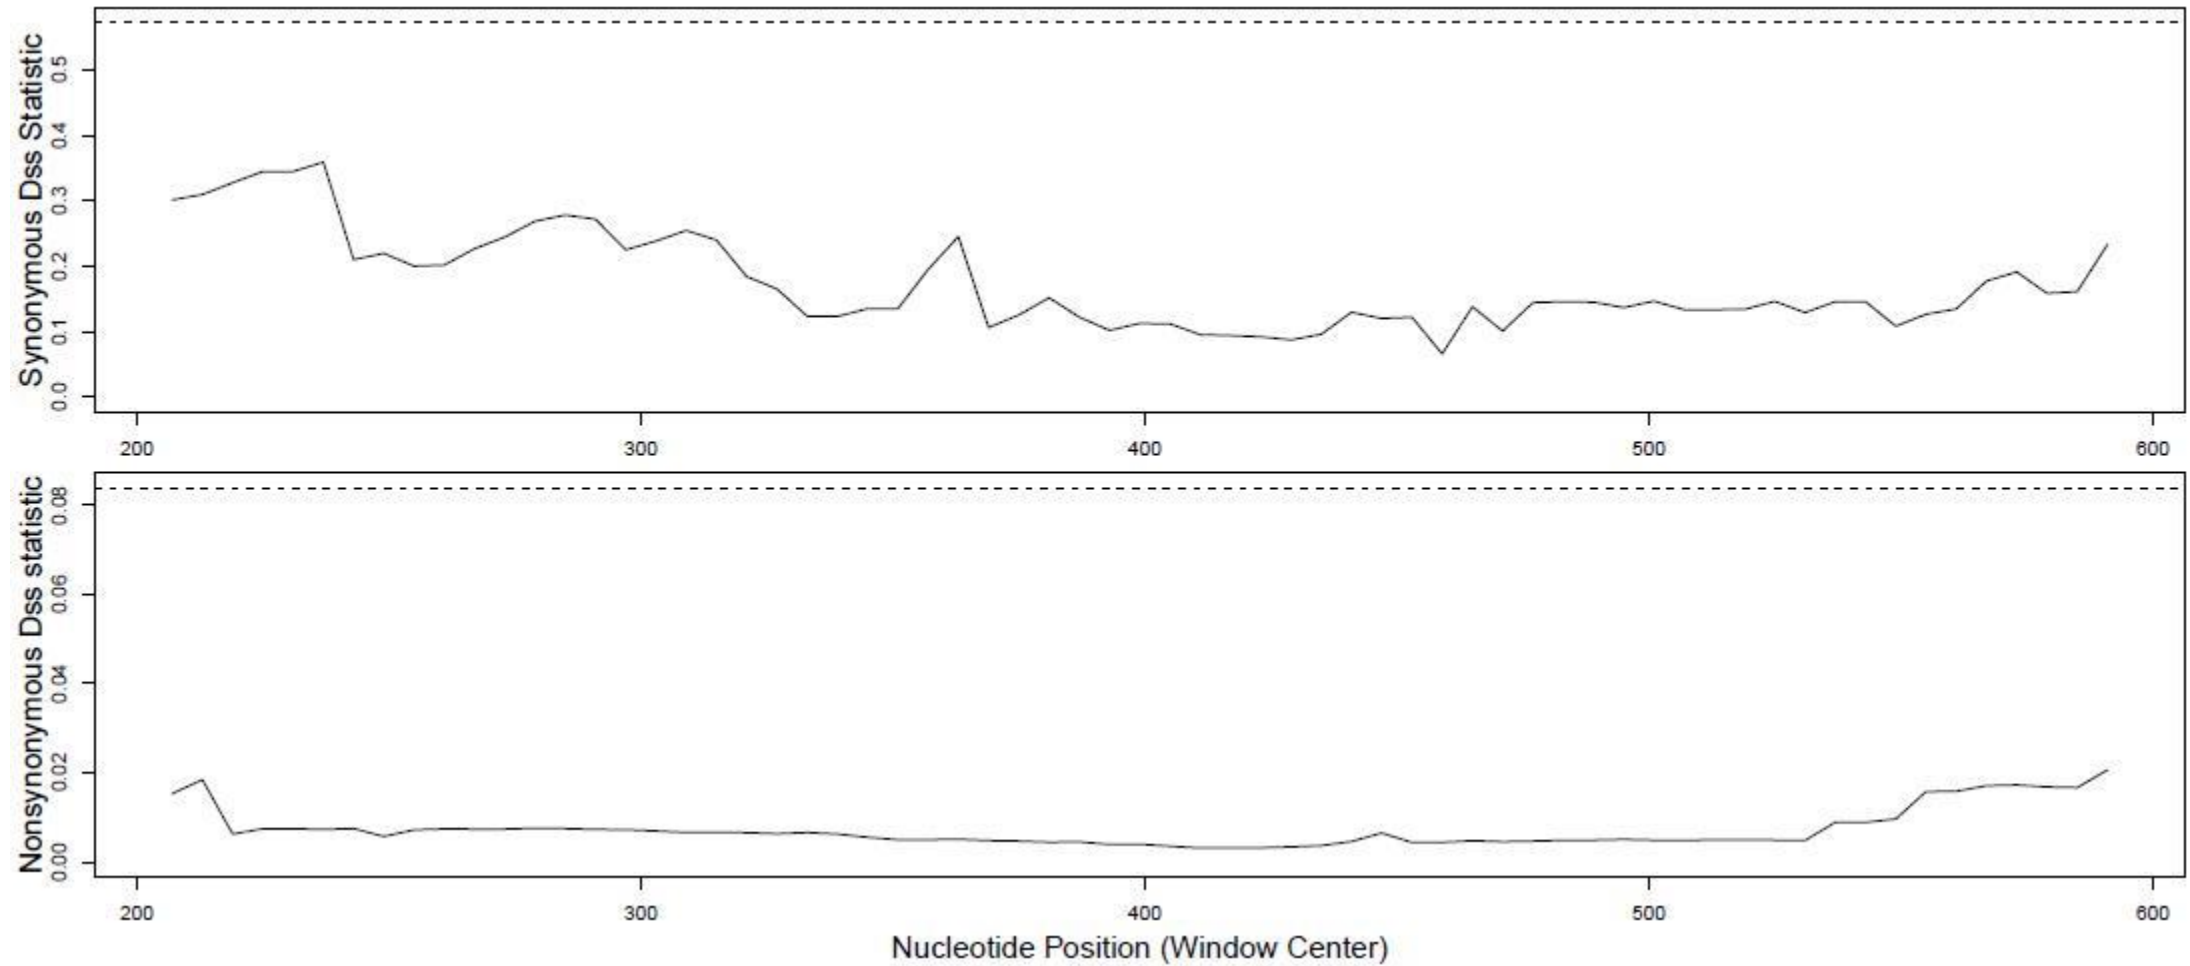

Dss statistic landscapes for synonymous and nonsynonymous changes. Dotted horizontal lines represent the 95% significance level for each test, from a parametric bootstrap with 500 replicates.

(A) 25 randomly selected core genes designated as **recombinants** by PhiPack (CONTD.)

HP\_1029

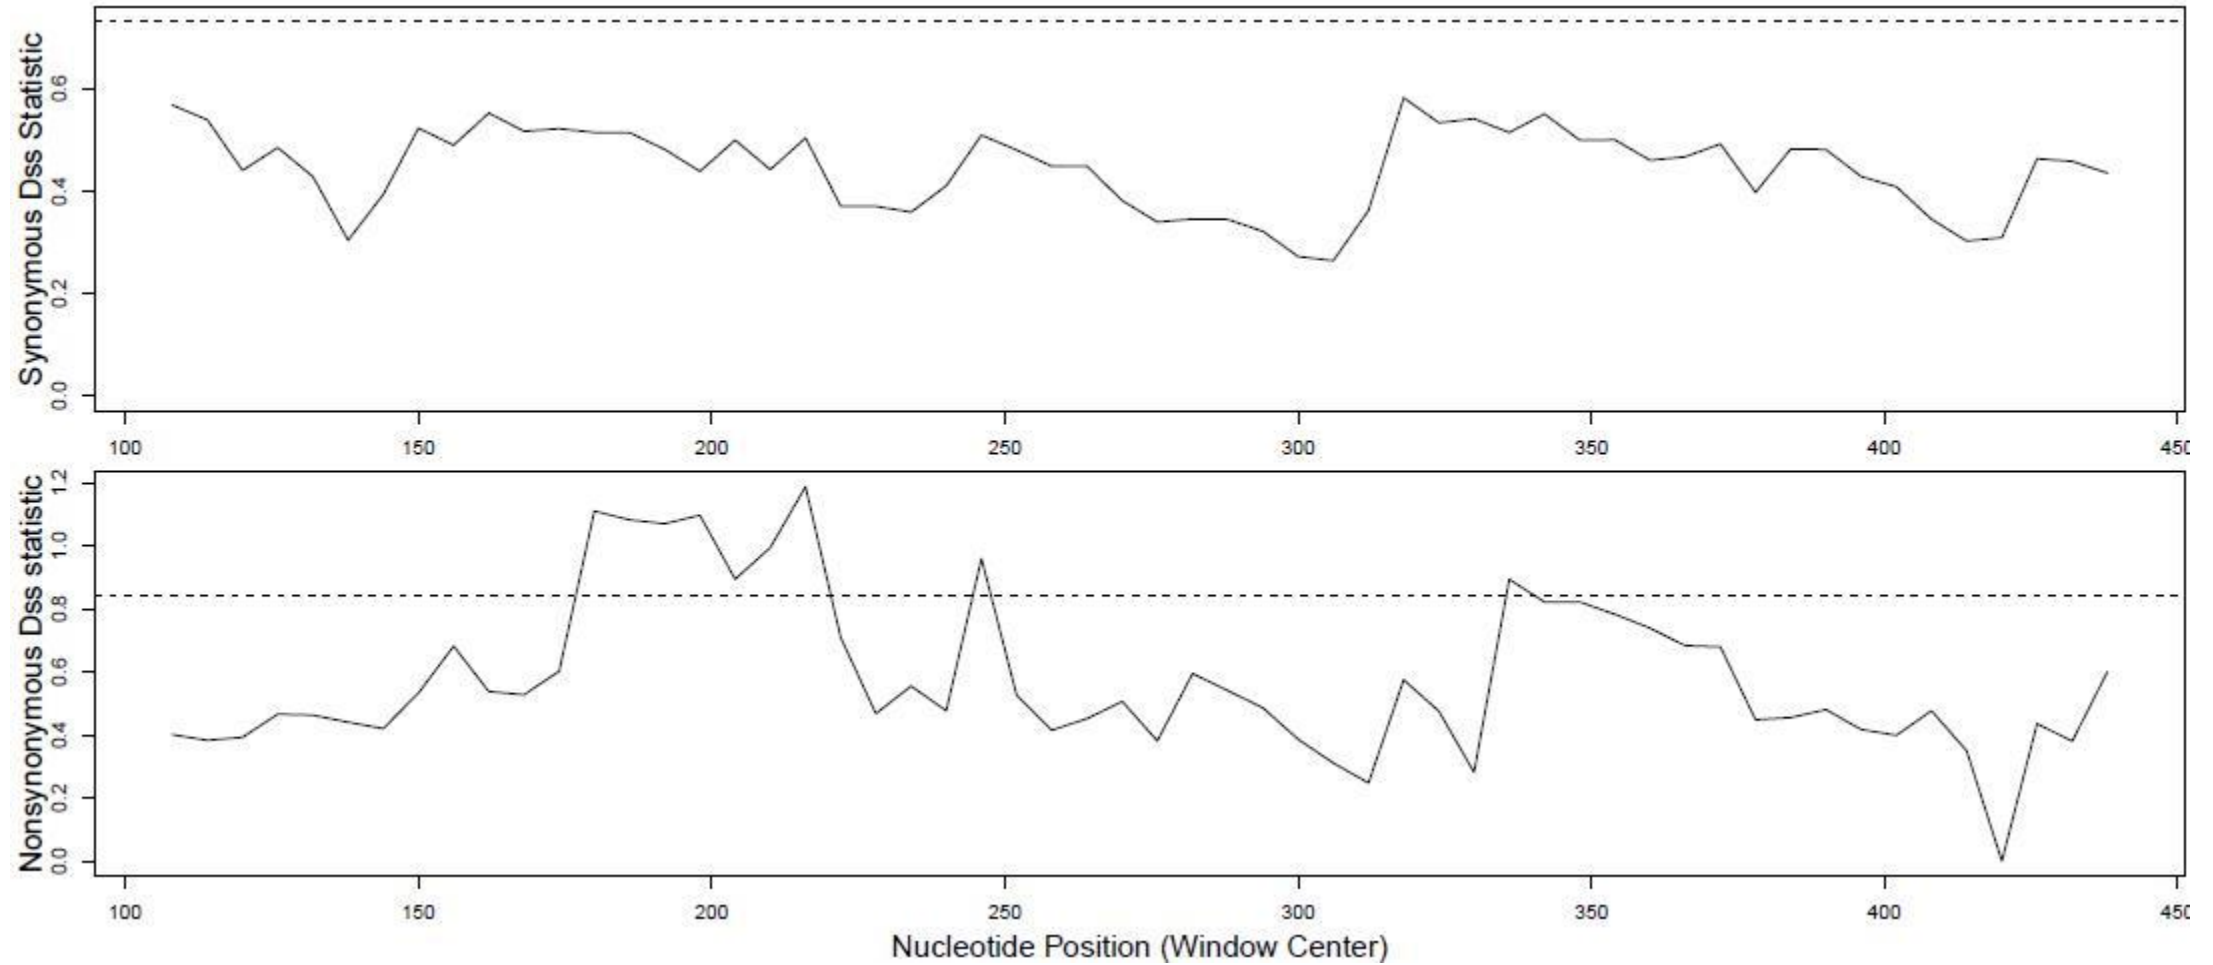

Dss statistic landscapes for synonymous and nonsynonymous changes. Dotted horizontal lines represent the 95% significance level for each test, from a parametric bootstrap with 500 replicates.

(A) 25 randomly selected core genes designated as **recombinants** by PhiPack (CONTD.)

HP\_1055

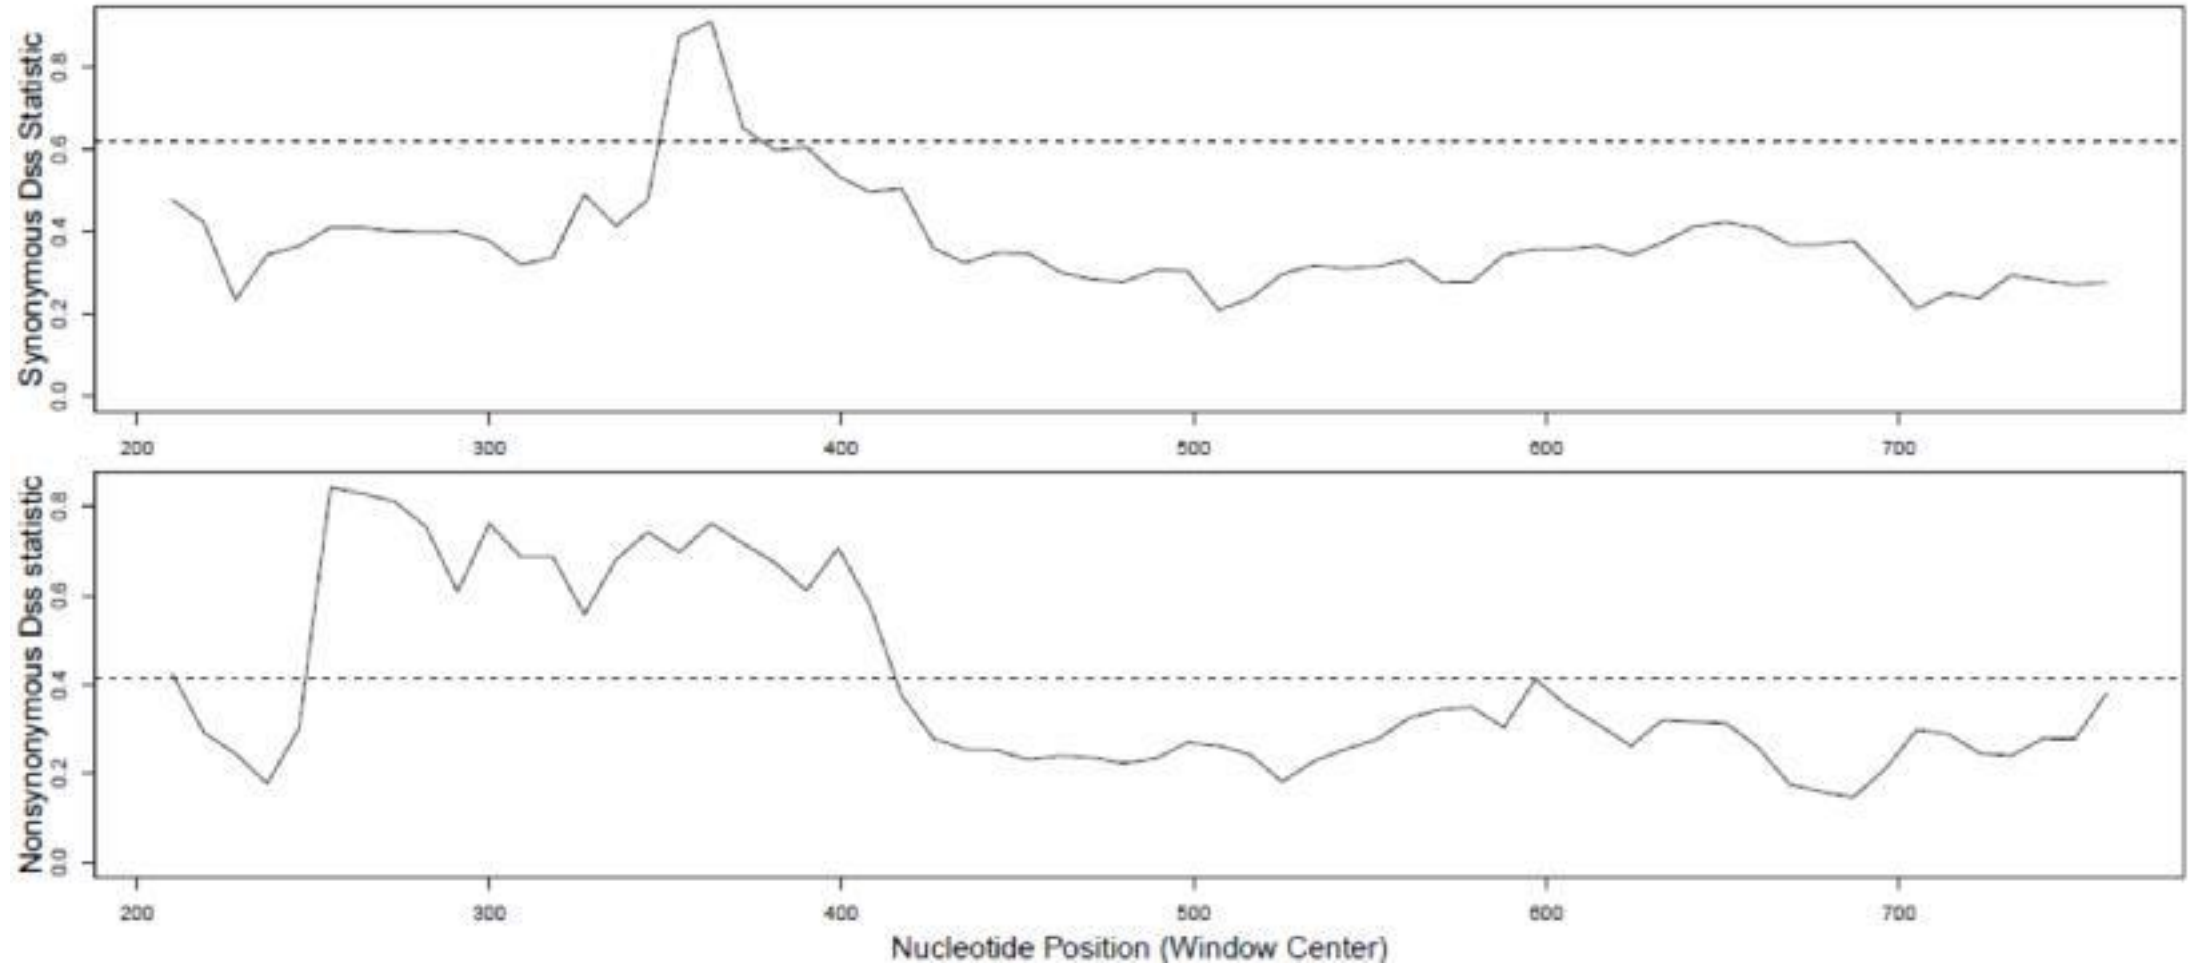

Dss statistic landscapes for synonymous and nonsynonymous changes. Dotted horizontal lines represent the 95% significance level for each test, from a parametric bootstrap with 500 replicates.

(A) 25 randomly selected core genes designated as **recombinants** by PhiPack (CONTD.)

HP\_1112

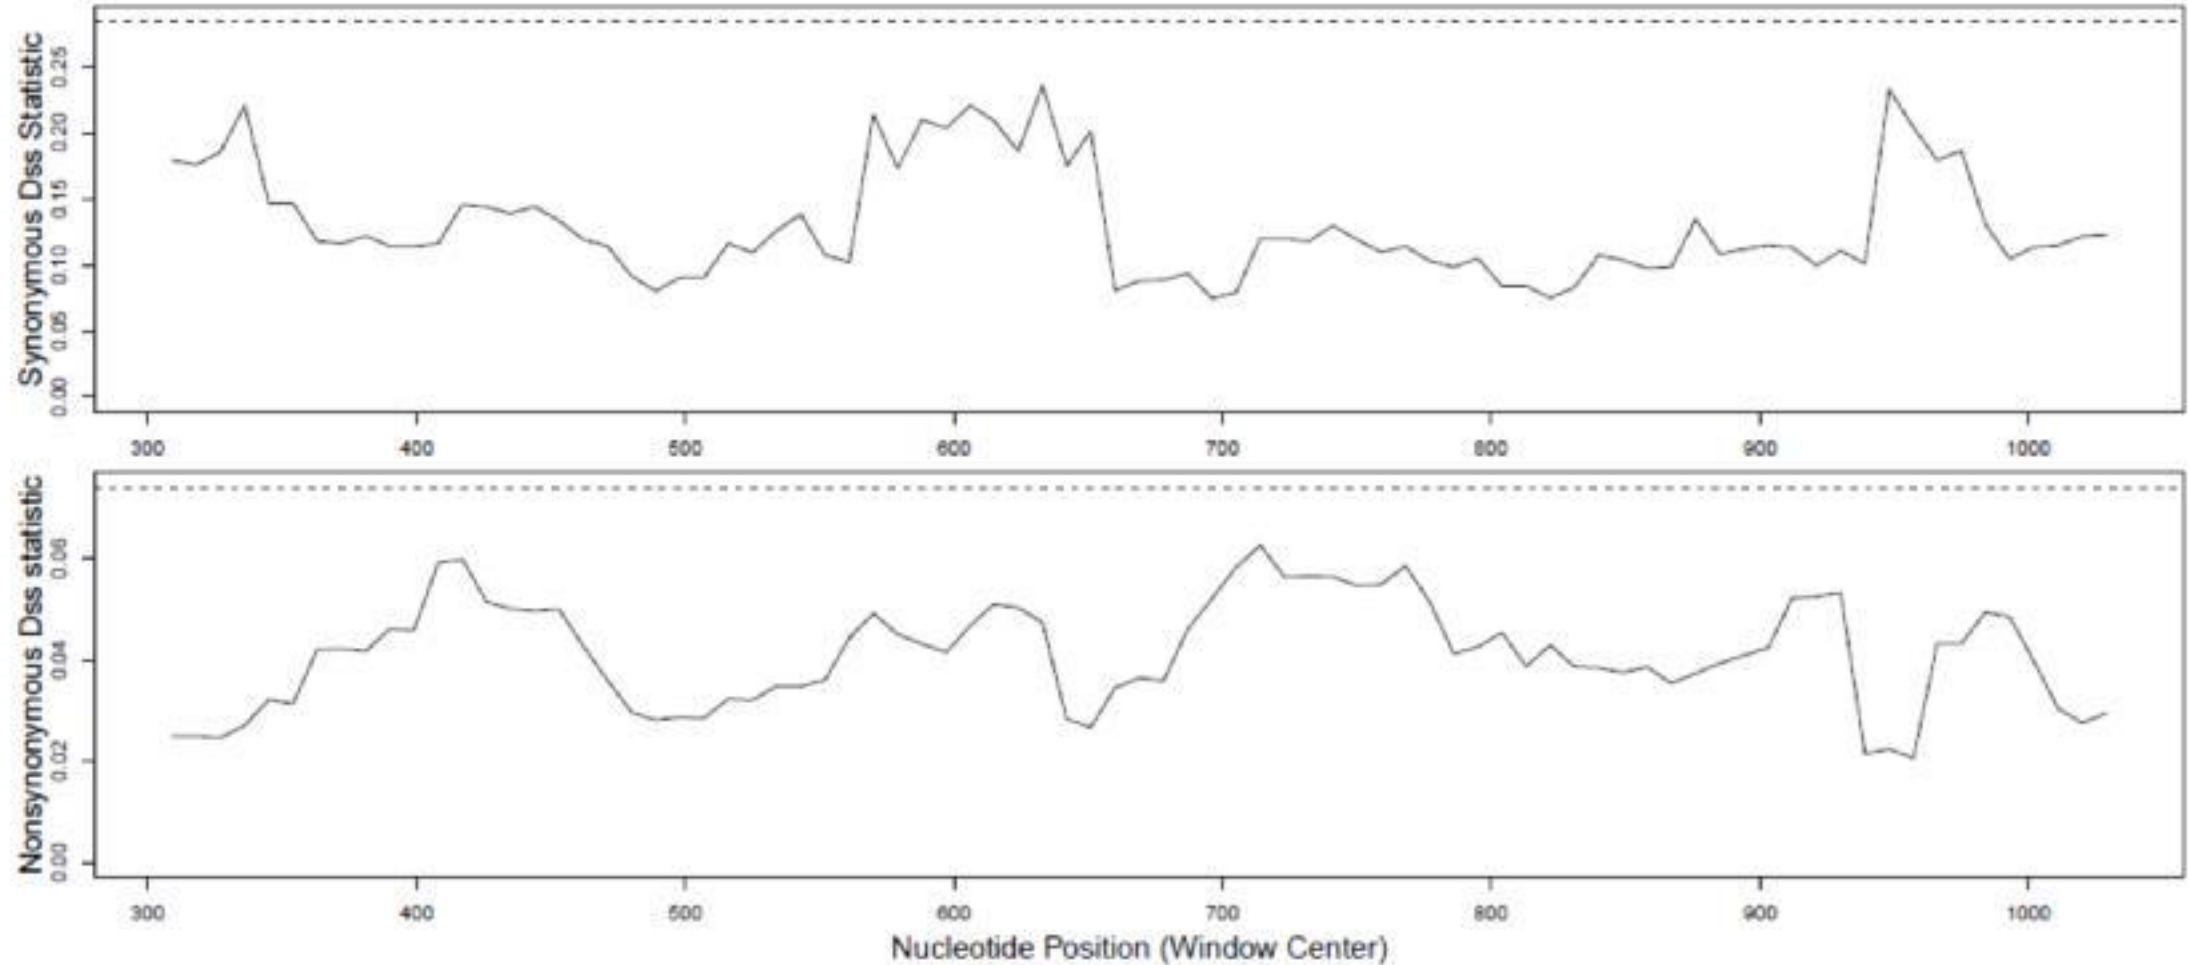

Dss statistic landscapes for synonymous and nonsynonymous changes. Dotted horizontal lines represent the 95% significance level for each test, from a parametric bootstrap with 500 replicates.

(A) 25 randomly selected core genes designated as **recombinants** by PhiPack (CONTD.)

HP\_1121

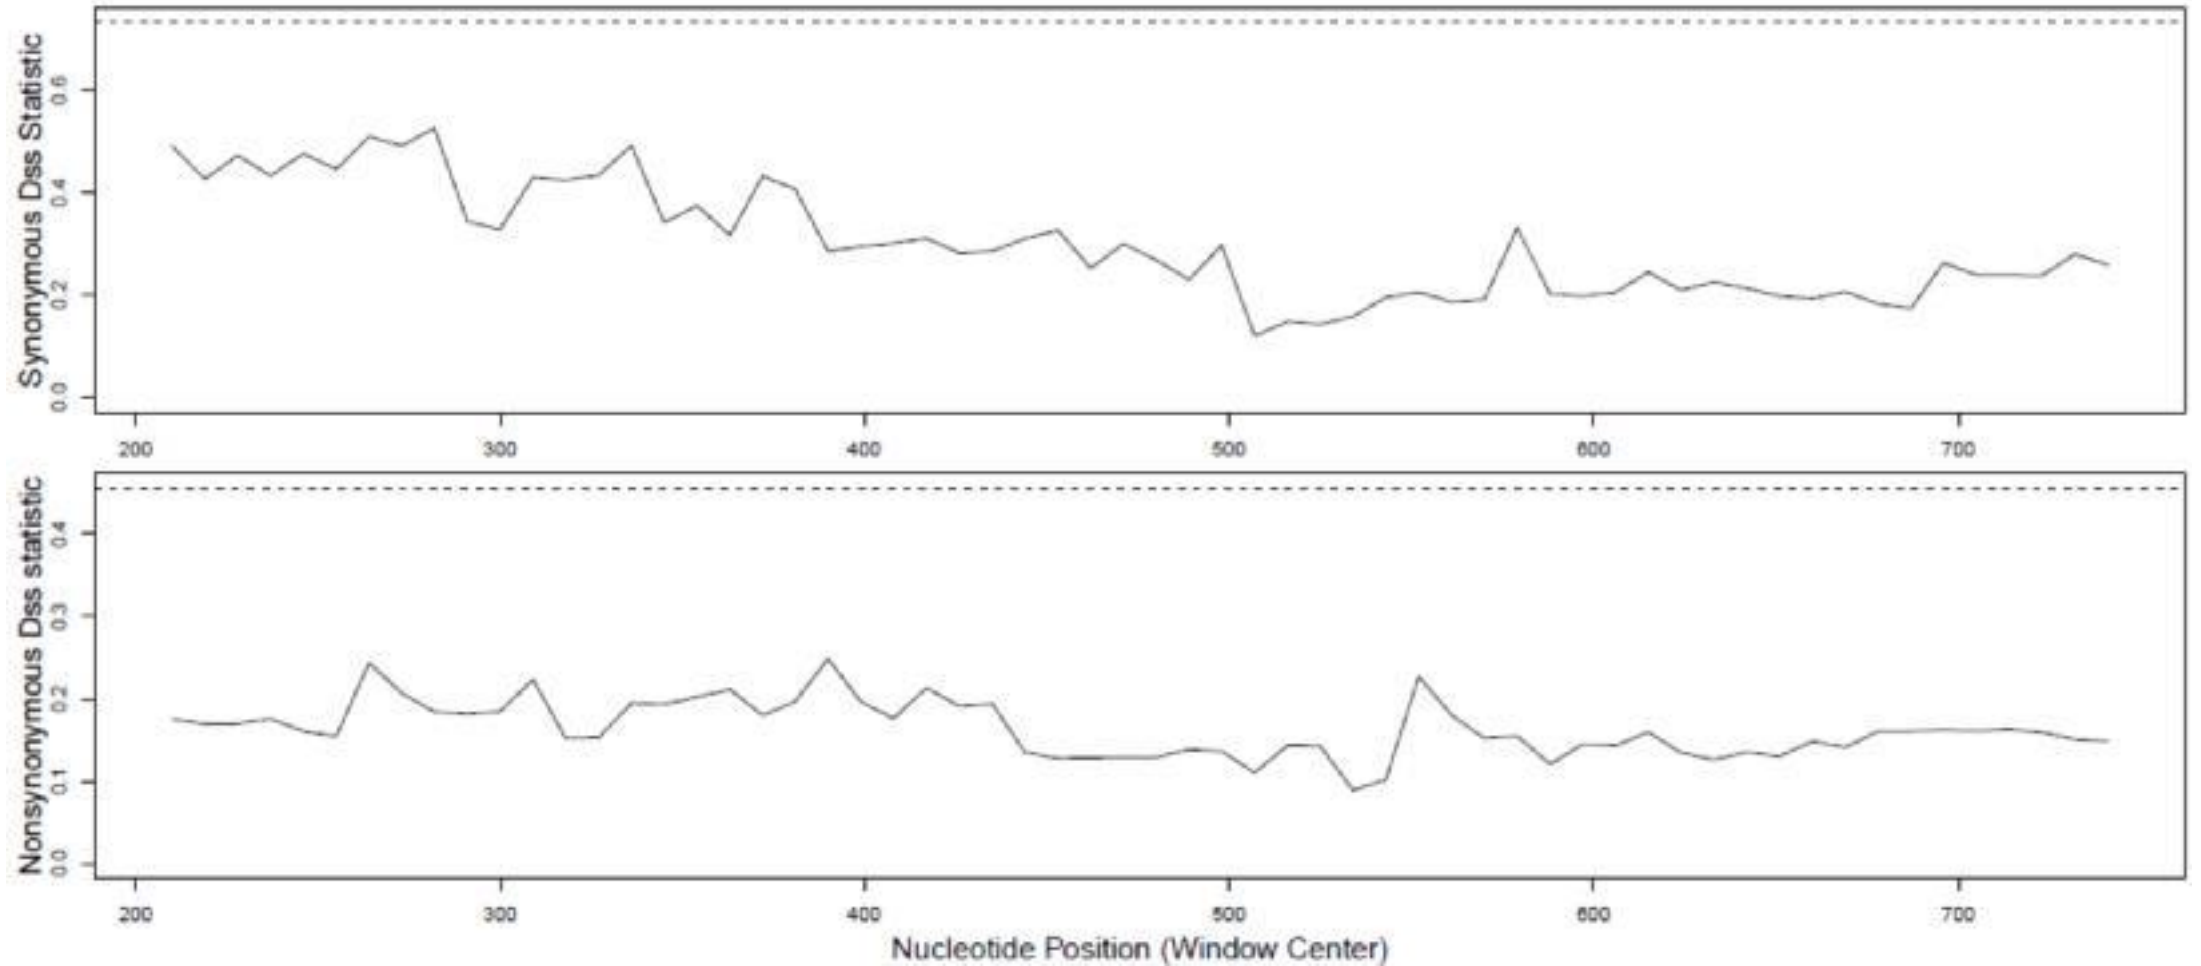

Dss statistic landscapes for synonymous and nonsynonymous changes. Dotted horizontal lines represent the 95% significance level for each test, from a parametric bootstrap with 500 replicates.

(A) 25 randomly selected core genes designated as **recombinants** by PhiPack (CONTD.)

HP\_1232

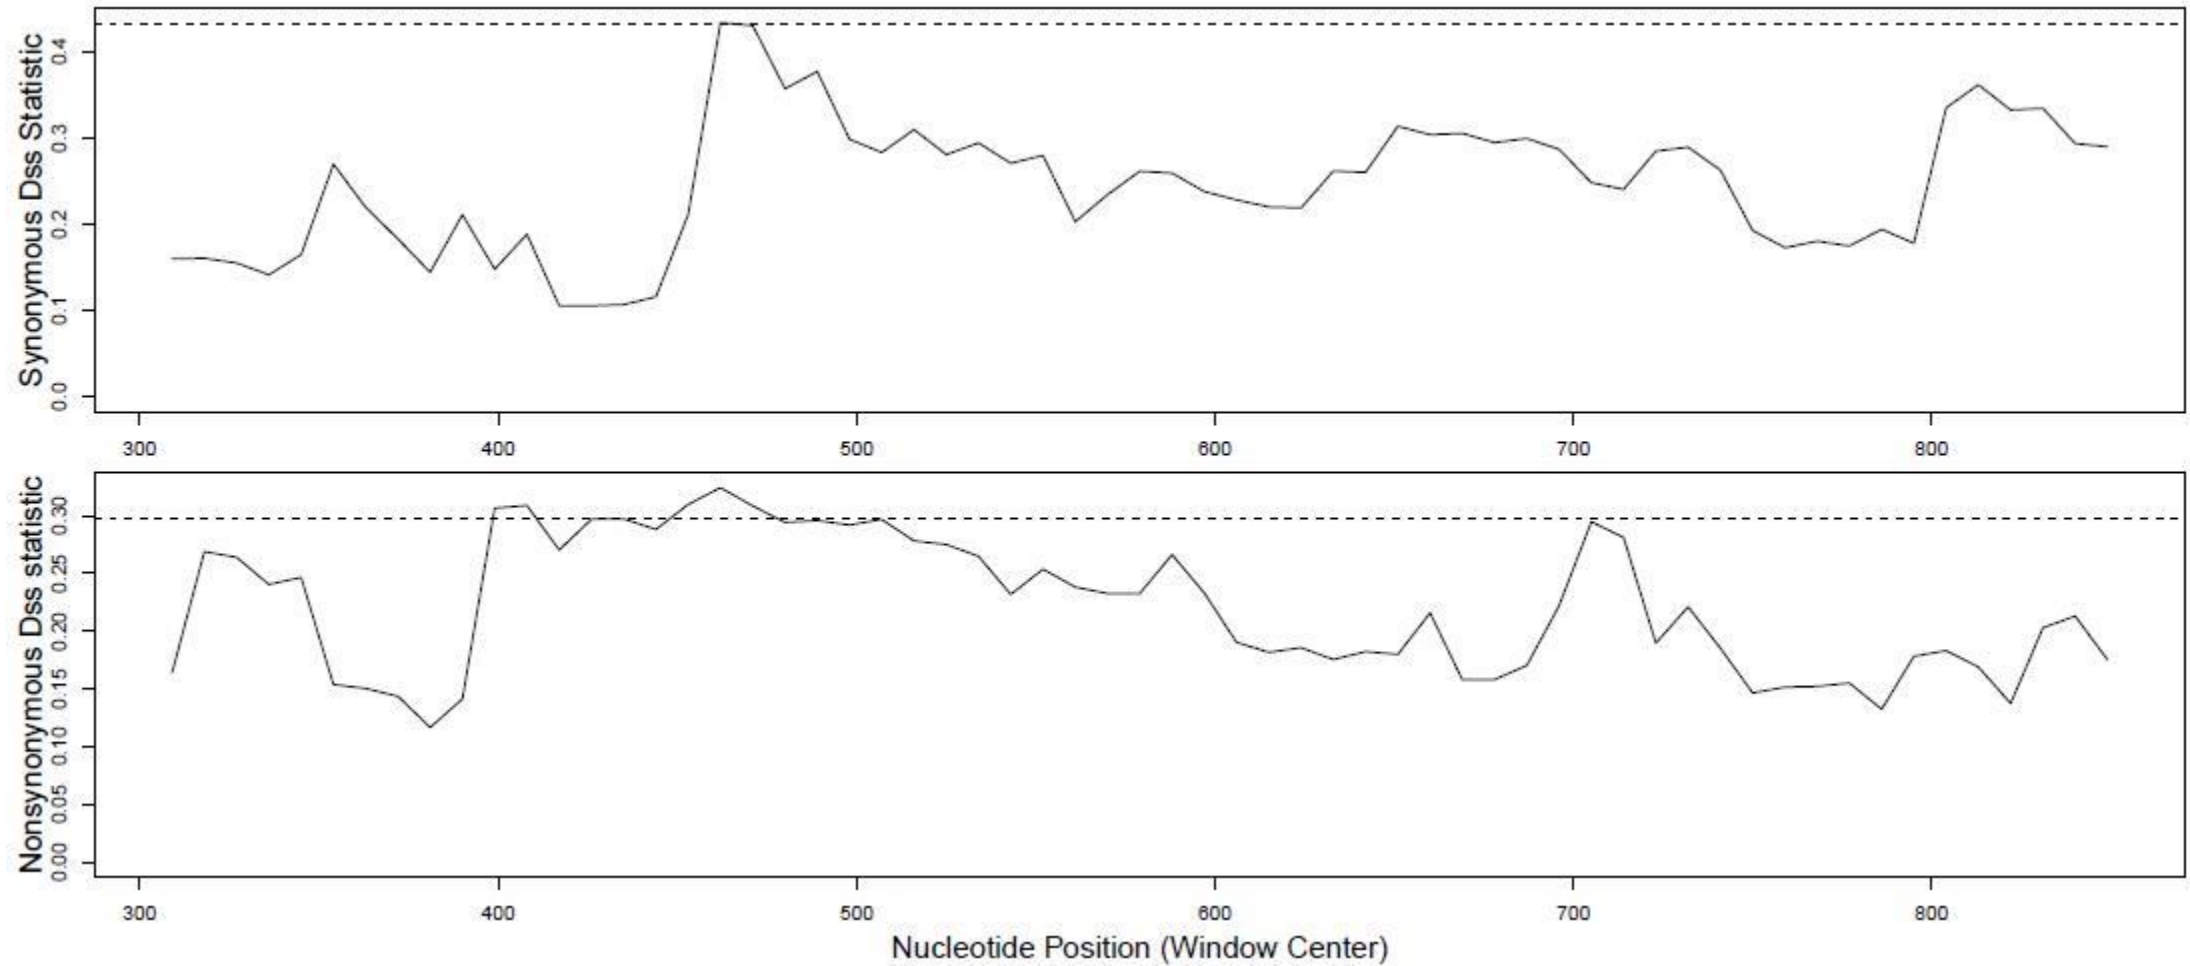

Dss statistic landscapes for synonymous and nonsynonymous changes. Dotted horizontal lines represent the 95% significance level for each test, from a parametric bootstrap with 500 replicates.

(A) 25 randomly selected core genes designated as **recombinants** by PhiPack (CONTD.)

HP\_1268

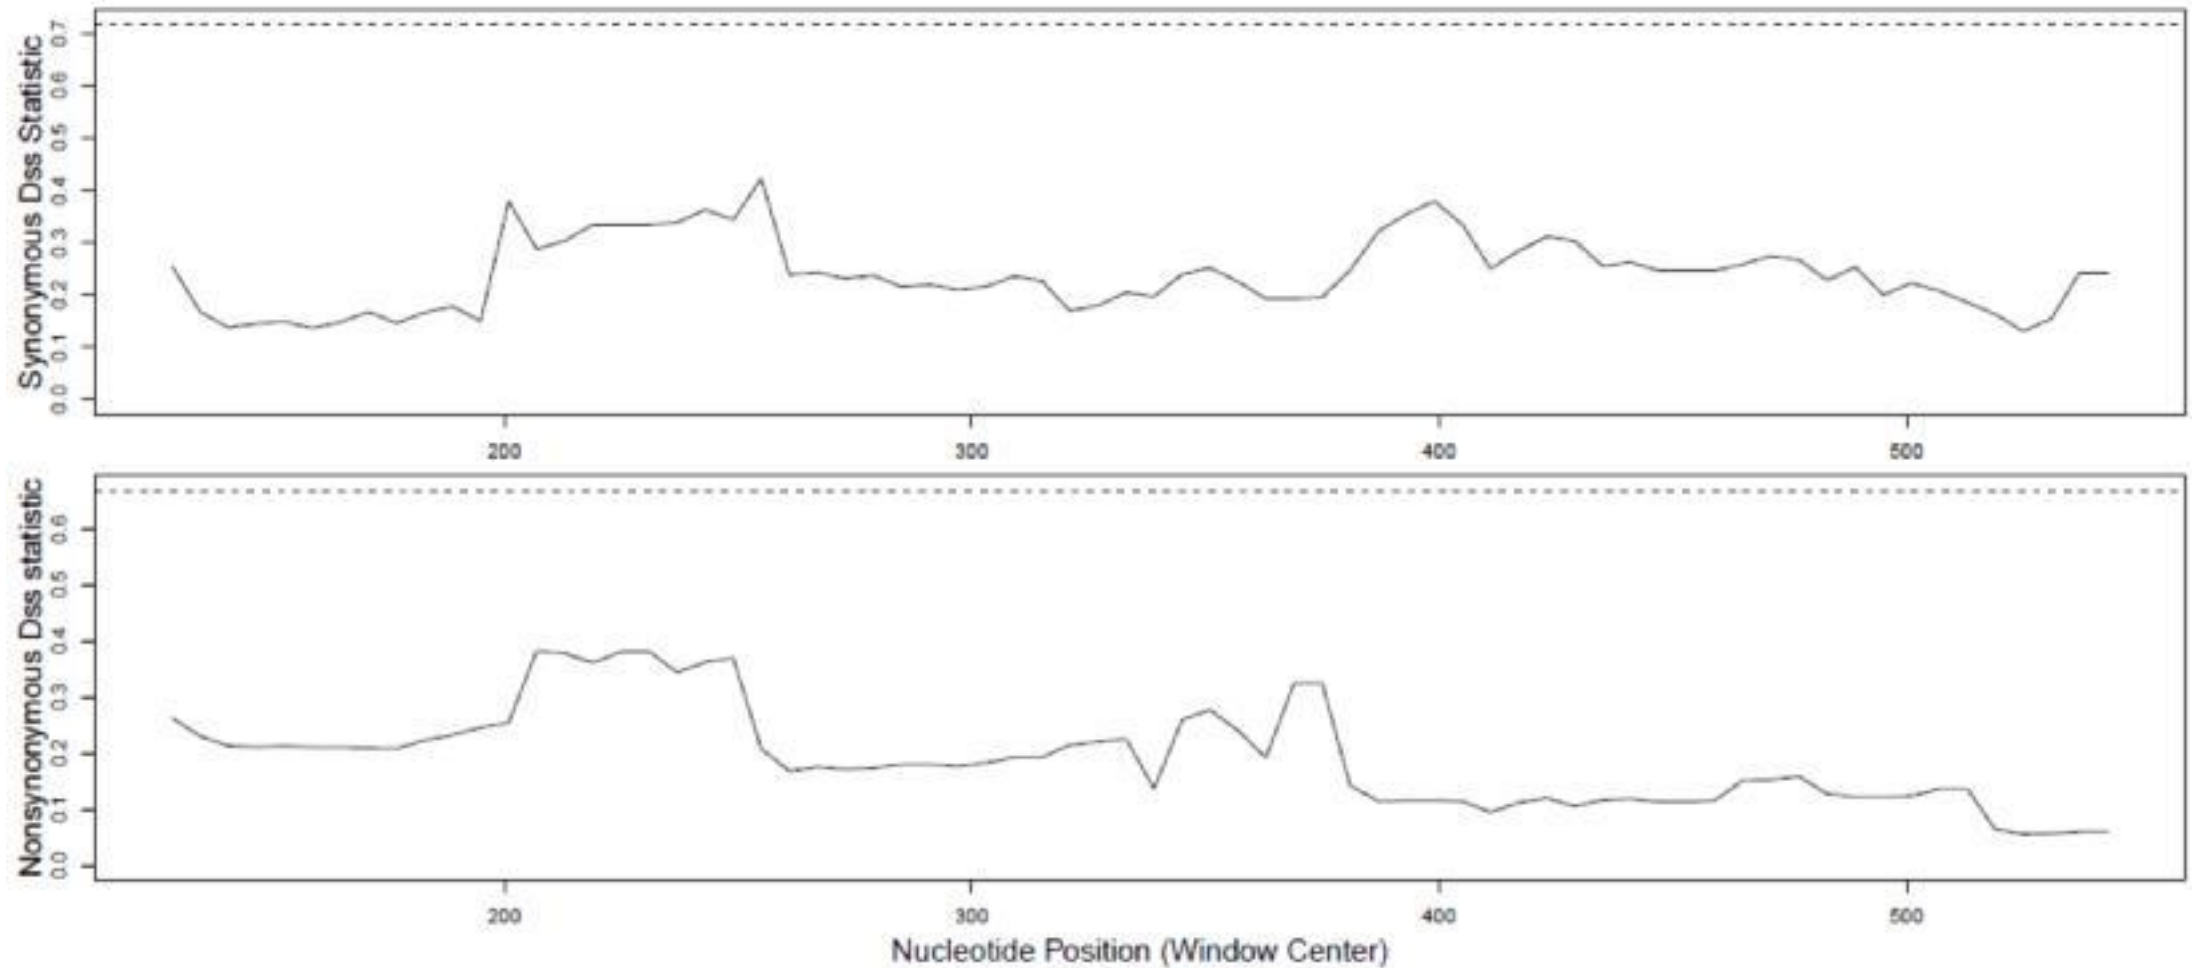

Dss statistic landscapes for synonymous and nonsynonymous changes. Dotted horizontal lines represent the 95% significance level for each test, from a parametric bootstrap with 500 replicates.



(A) 25 randomly selected core genes designated as **recombinants** by PhiPack (CONTD.)

HP\_1508

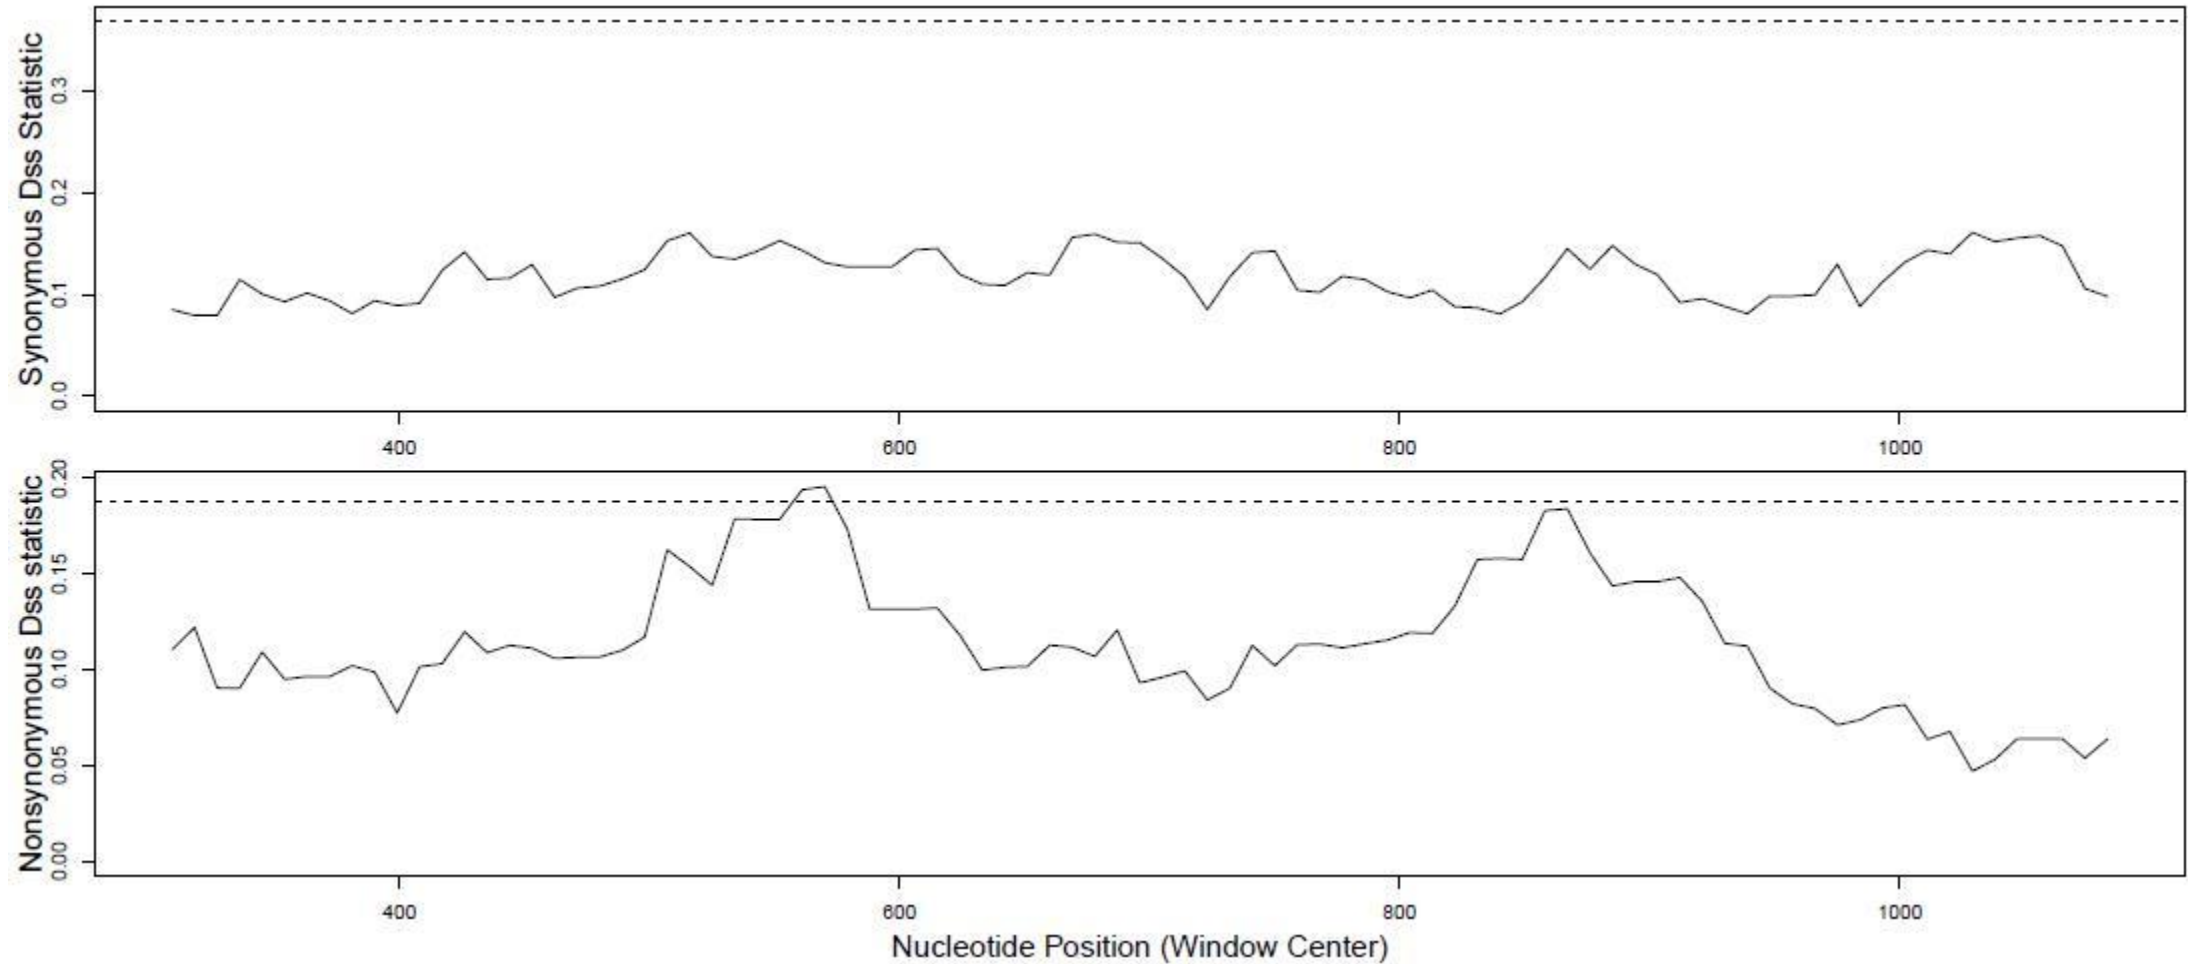

Dss statistic landscapes for synonymous and nonsynonymous changes. Dotted horizontal lines represent the 95% significance level for each test, from a parametric bootstrap with 500 replicates.

(A) 25 randomly selected core genes designated as **recombinants** by PhiPack (CONTD.)

HP\_1529

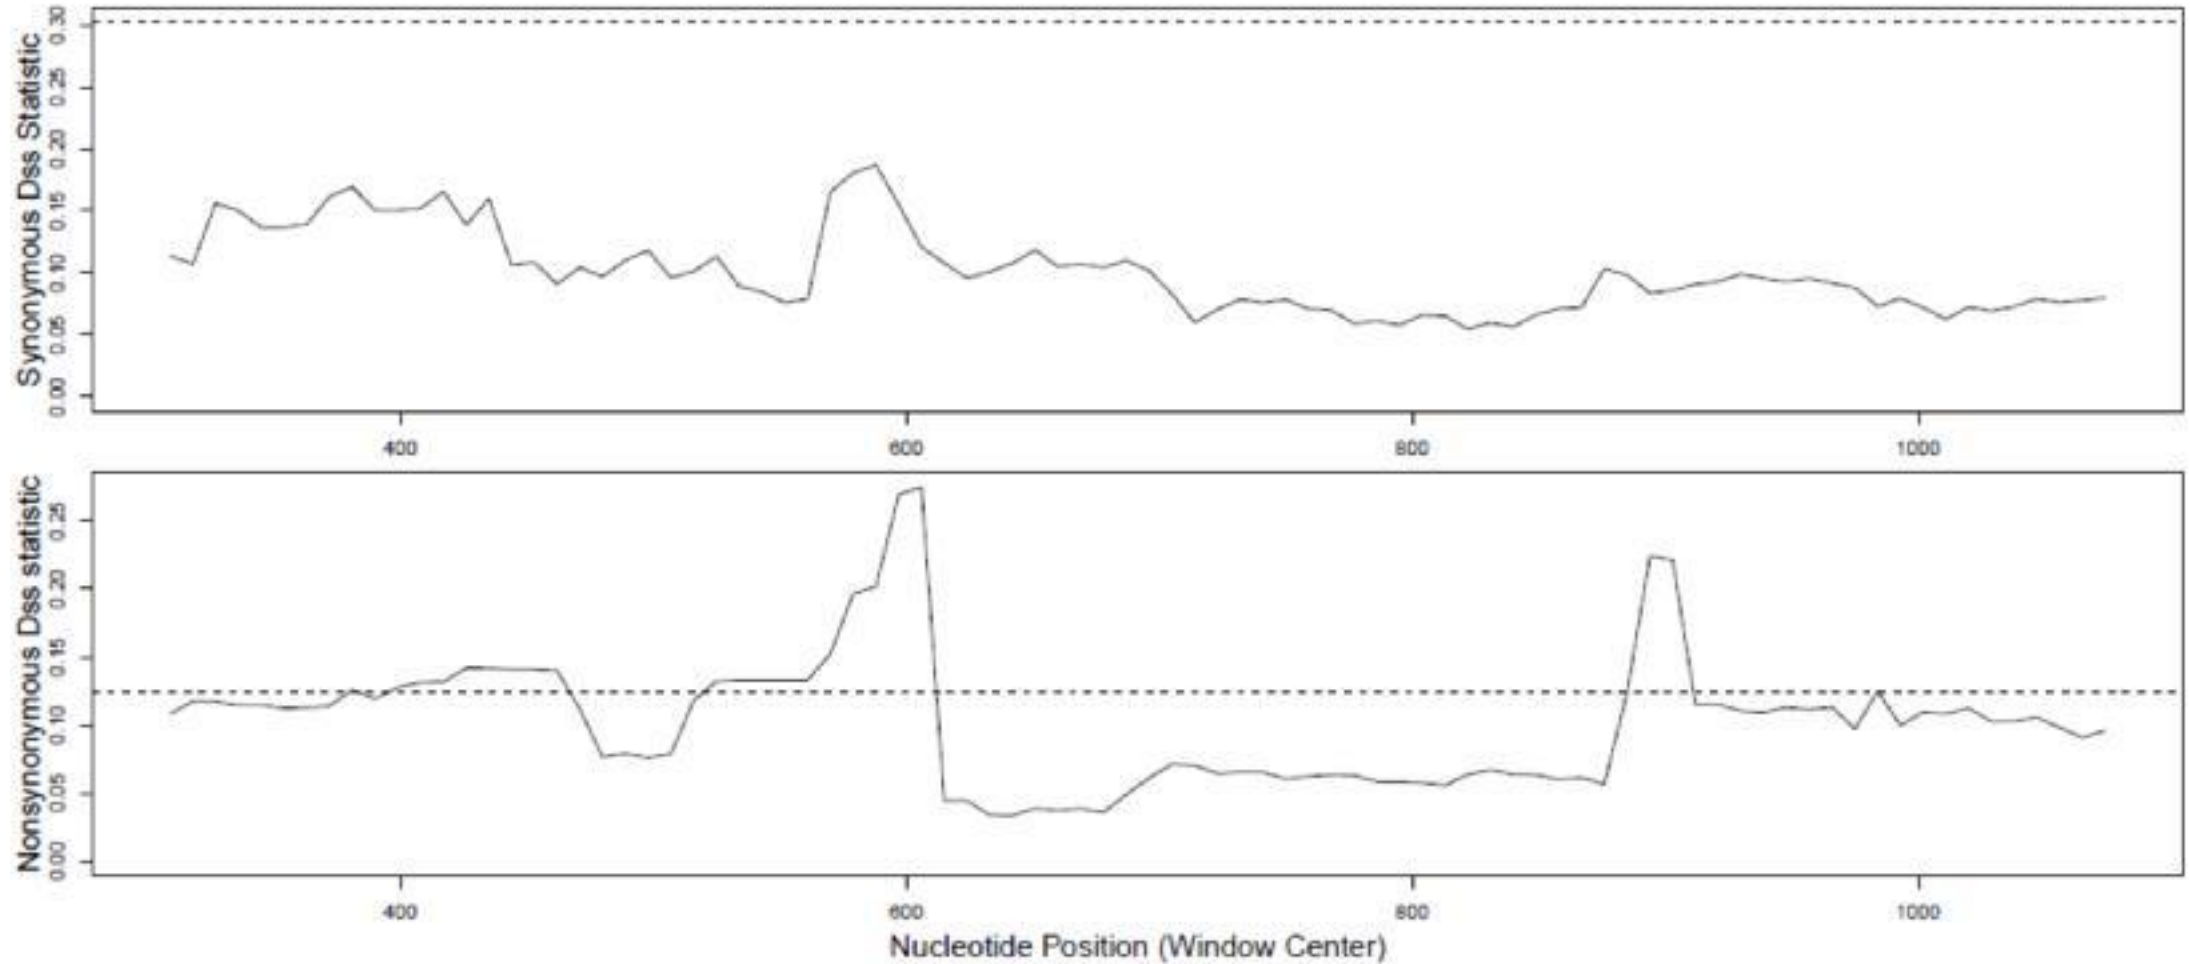

Dss statistic landscapes for synonymous and nonsynonymous changes. Dotted horizontal lines represent the 95% significance level for each test, from a parametric bootstrap with 500 replicates.

(B) 25 randomly selected core genes designated as **non-recombinants** by PhiPack

HP\_0020

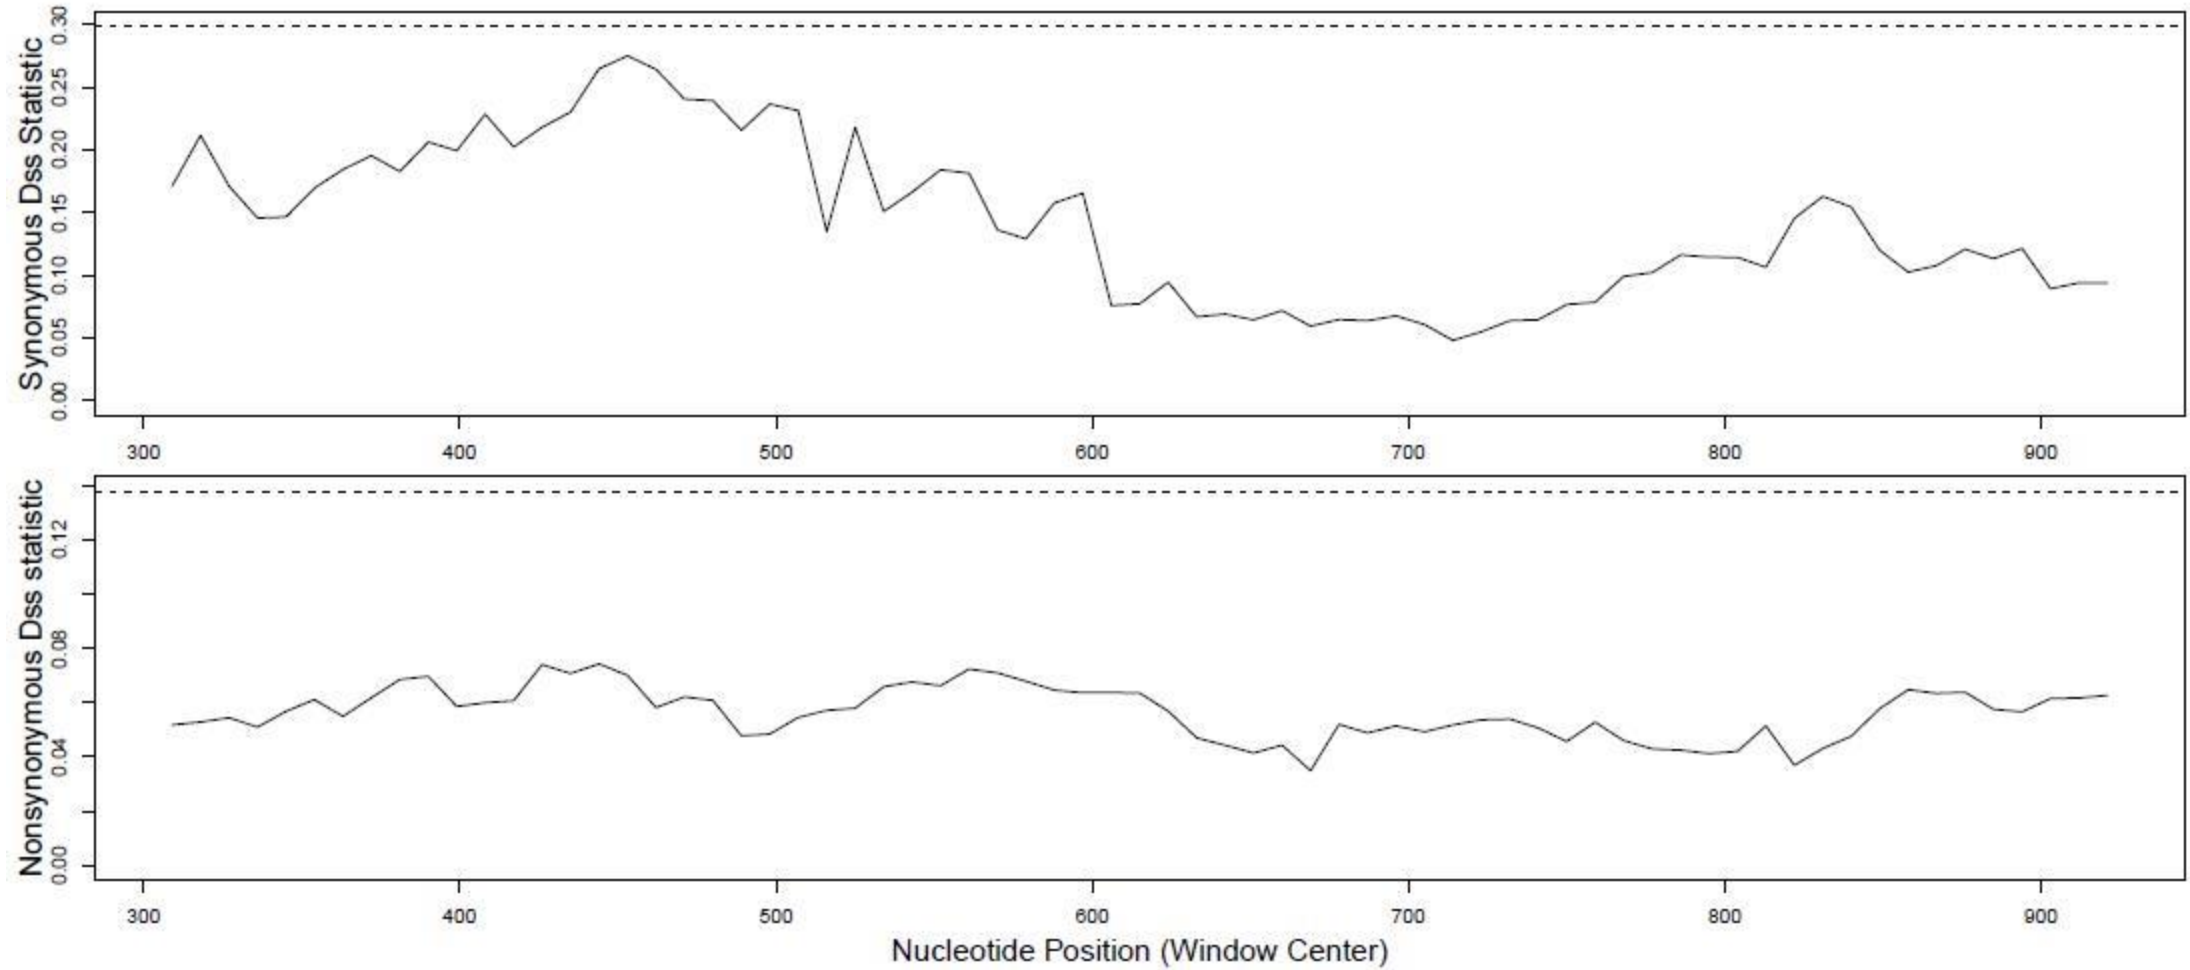

Dss statistic landscapes for synonymous and nonsynonymous changes. Dotted horizontal lines represent the 95% significance level for each test, from a parametric bootstrap with 500 replicates.

(B) 25 randomly selected core genes designated as **non-recombinants** by PhiPack (CONTD.)

HP\_0124

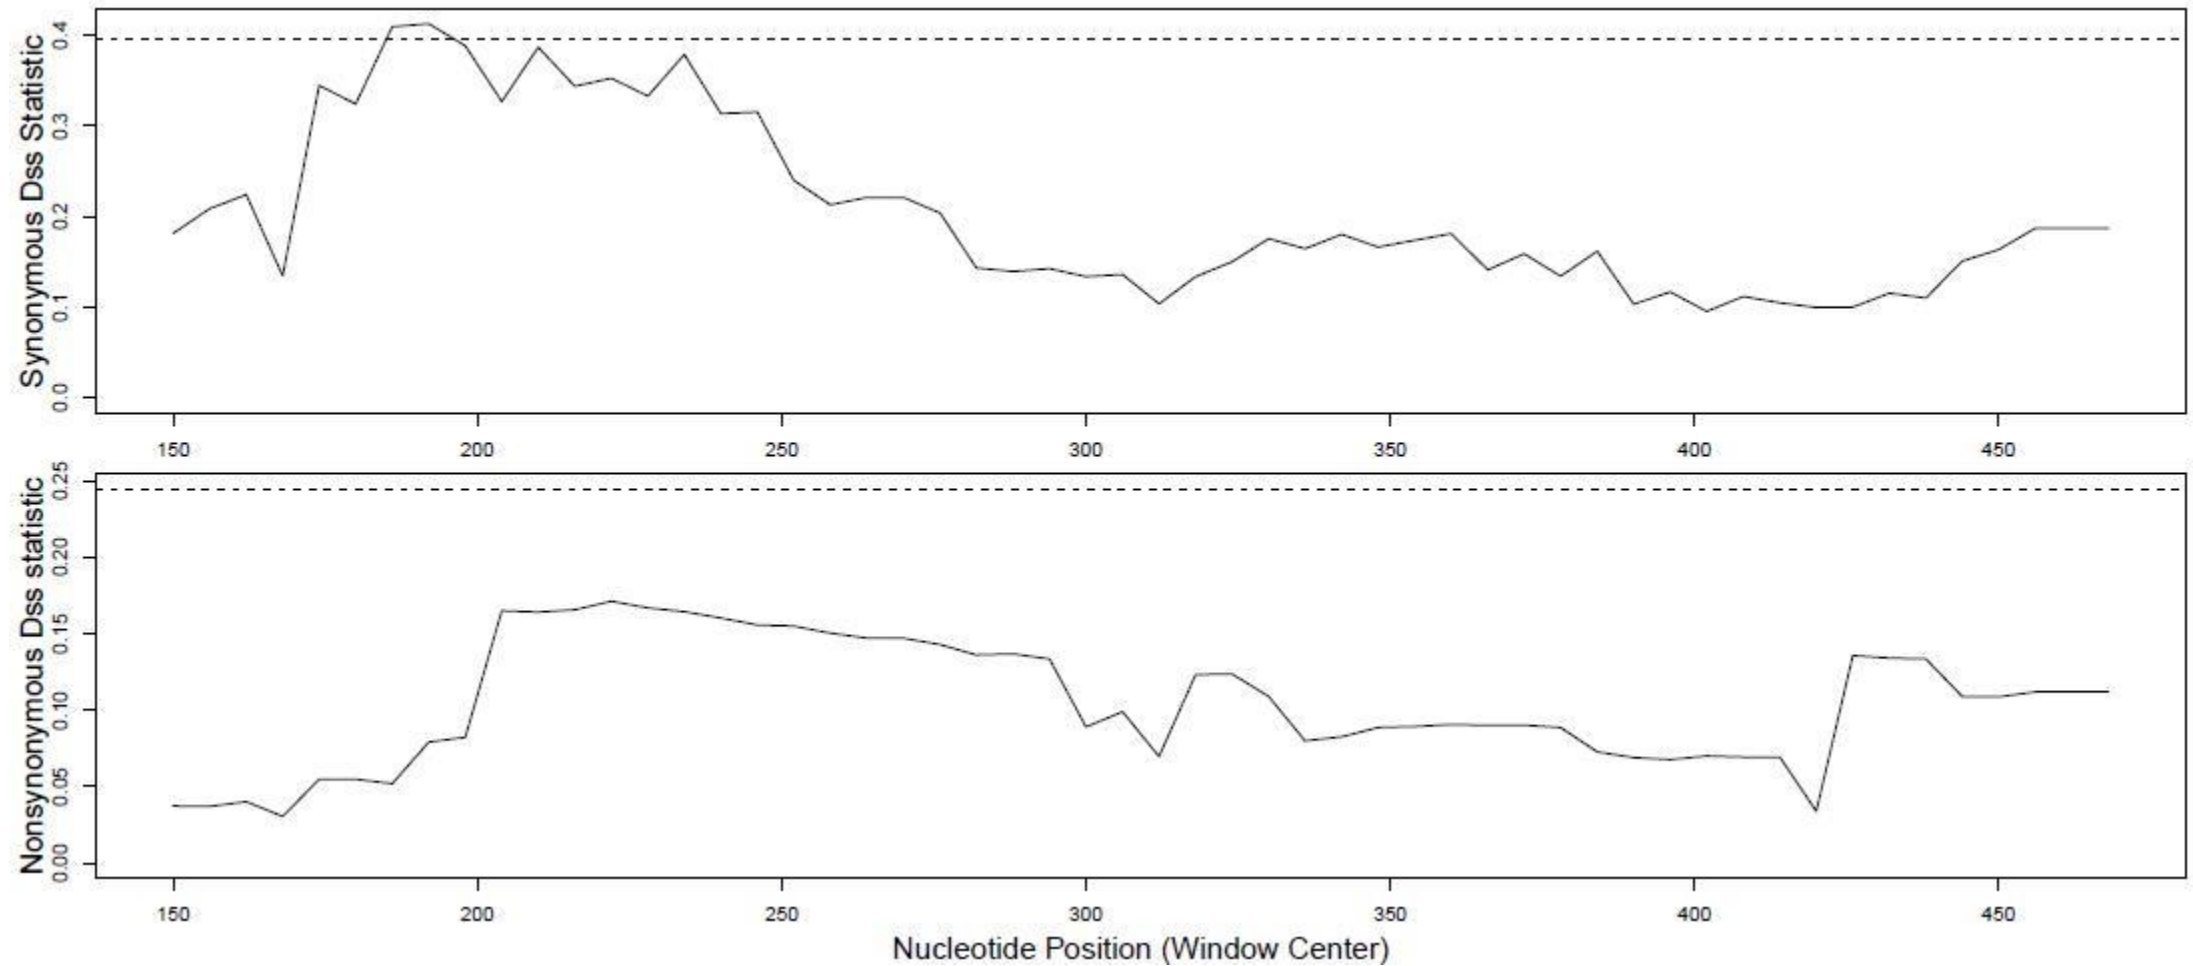

Dss statistic landscapes for synonymous and nonsynonymous changes. Dotted horizontal lines represent the 95% significance level for each test, from a parametric bootstrap with 500 replicates.

(B) 25 randomly selected core genes designated as **non-recombinants** by PhiPack (CONTD.)

HP\_0146

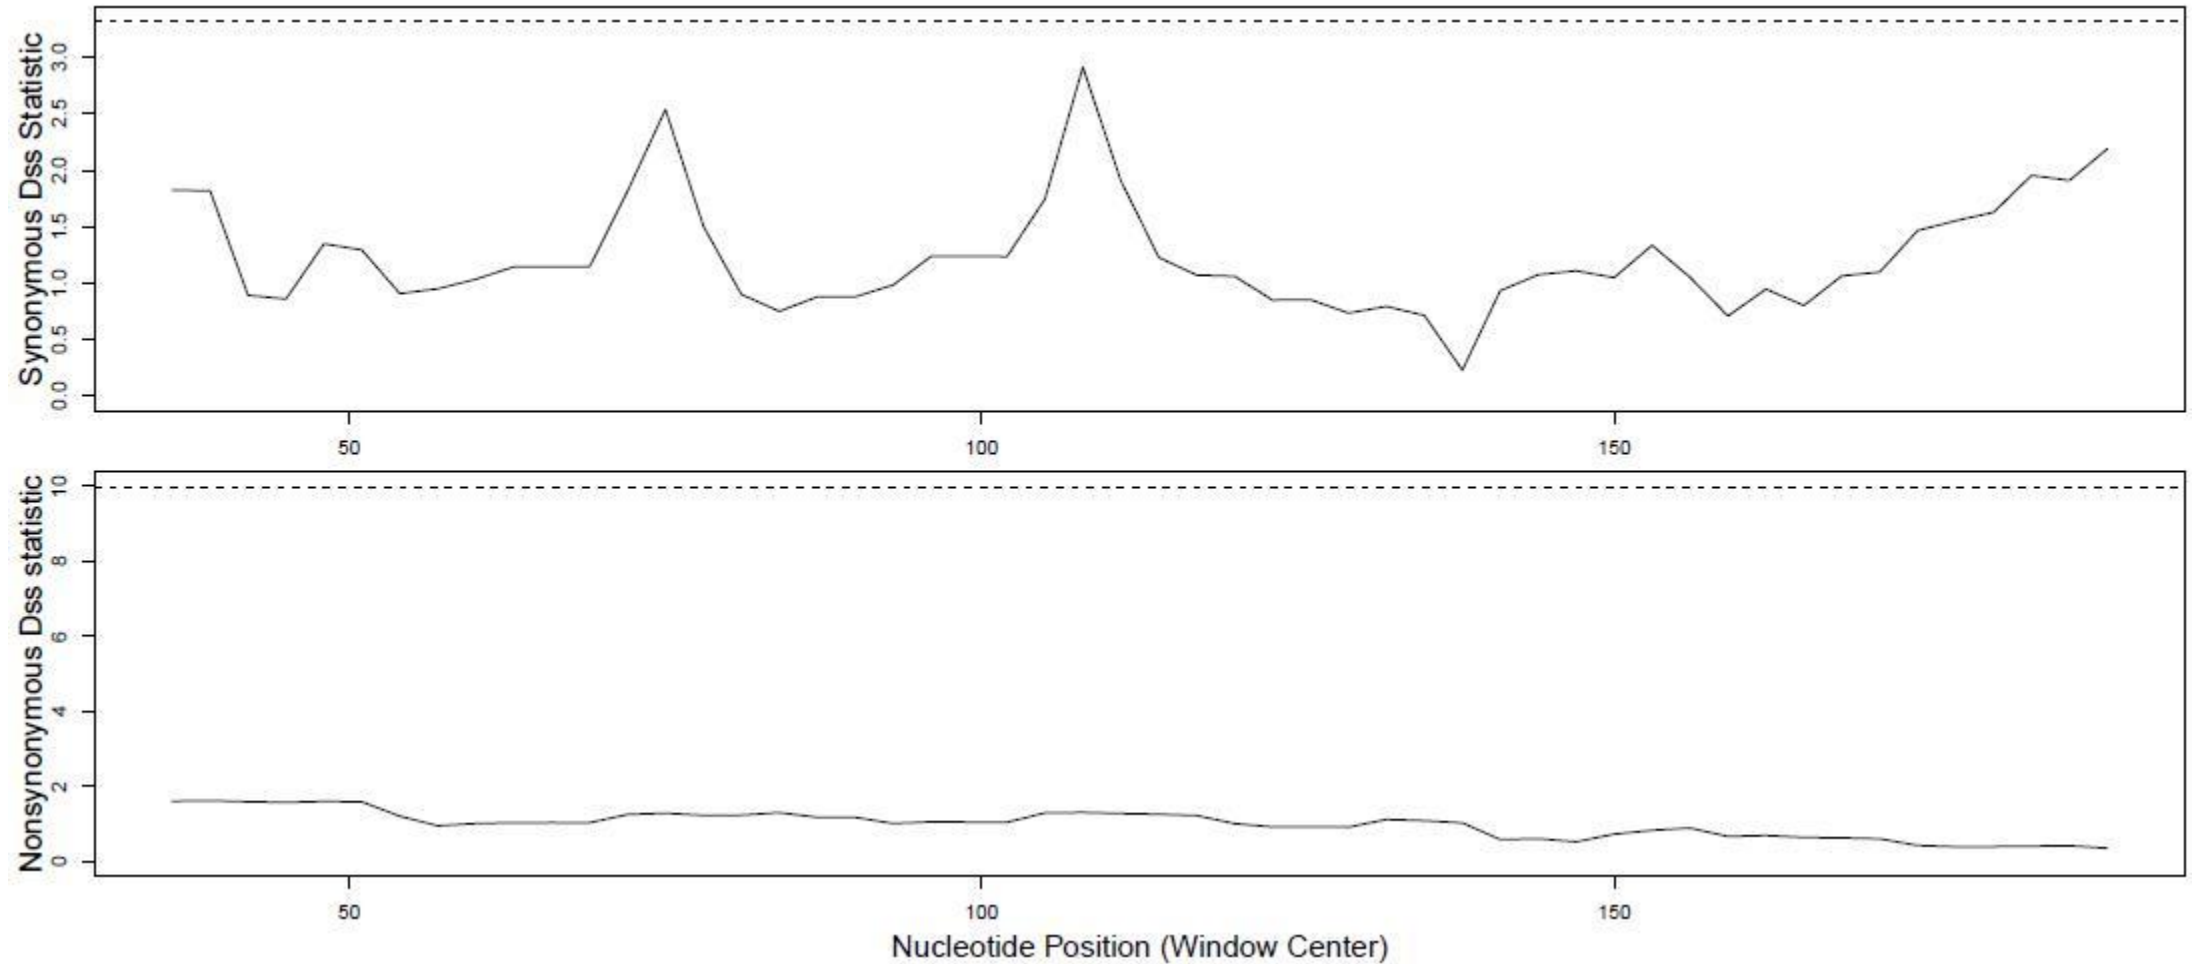

Dss statistic landscapes for synonymous and nonsynonymous changes. Dotted horizontal lines represent the 95% significance level for each test, from a parametric bootstrap with 500 replicates.

(B) 25 randomly selected core genes designated as **non-recombinants** by PhiPack (CONTD.)

HP\_0192

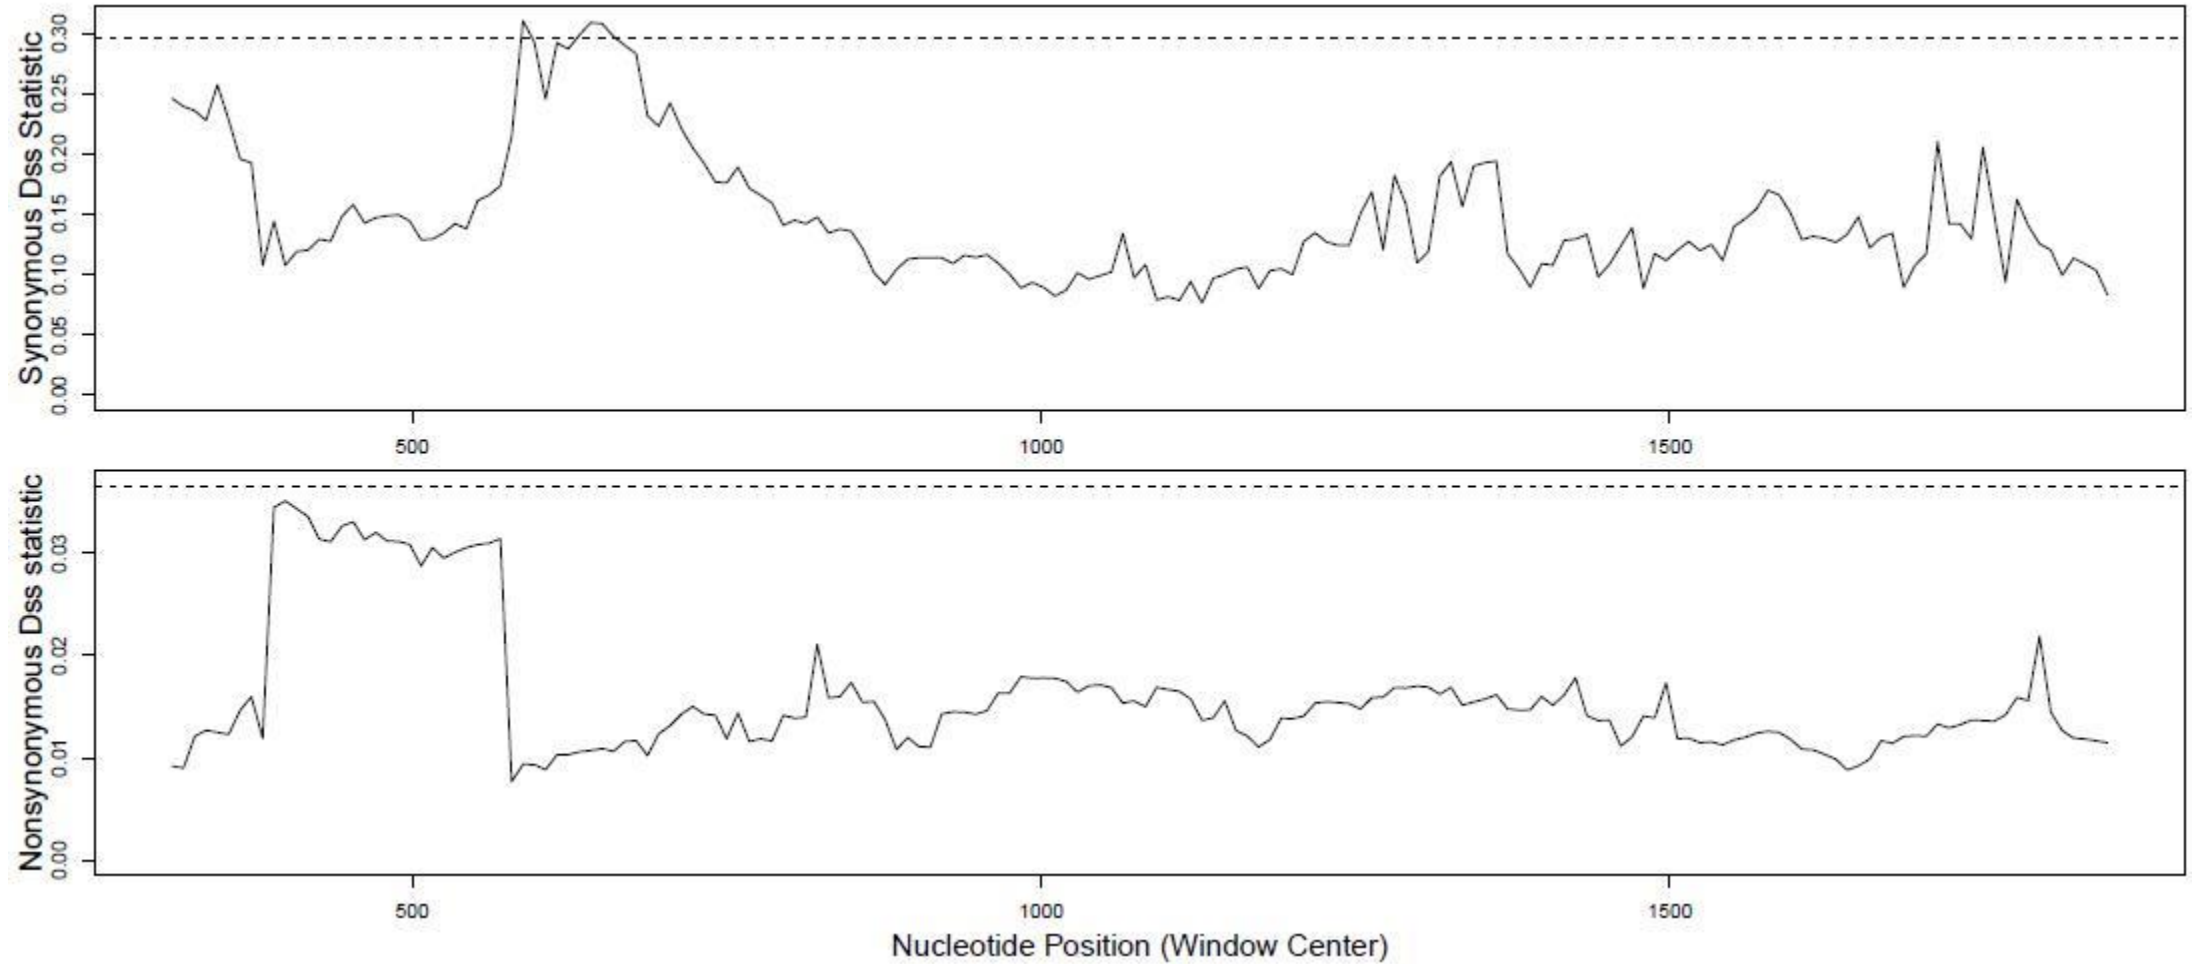

Dss statistic landscapes for synonymous and nonsynonymous changes. Dotted horizontal lines represent the 95% significance level for each test, from a parametric bootstrap with 500 replicates.

(B) 25 randomly selected core genes designated as **non-recombinants** by PhiPack (CONTD.)

HP\_0232

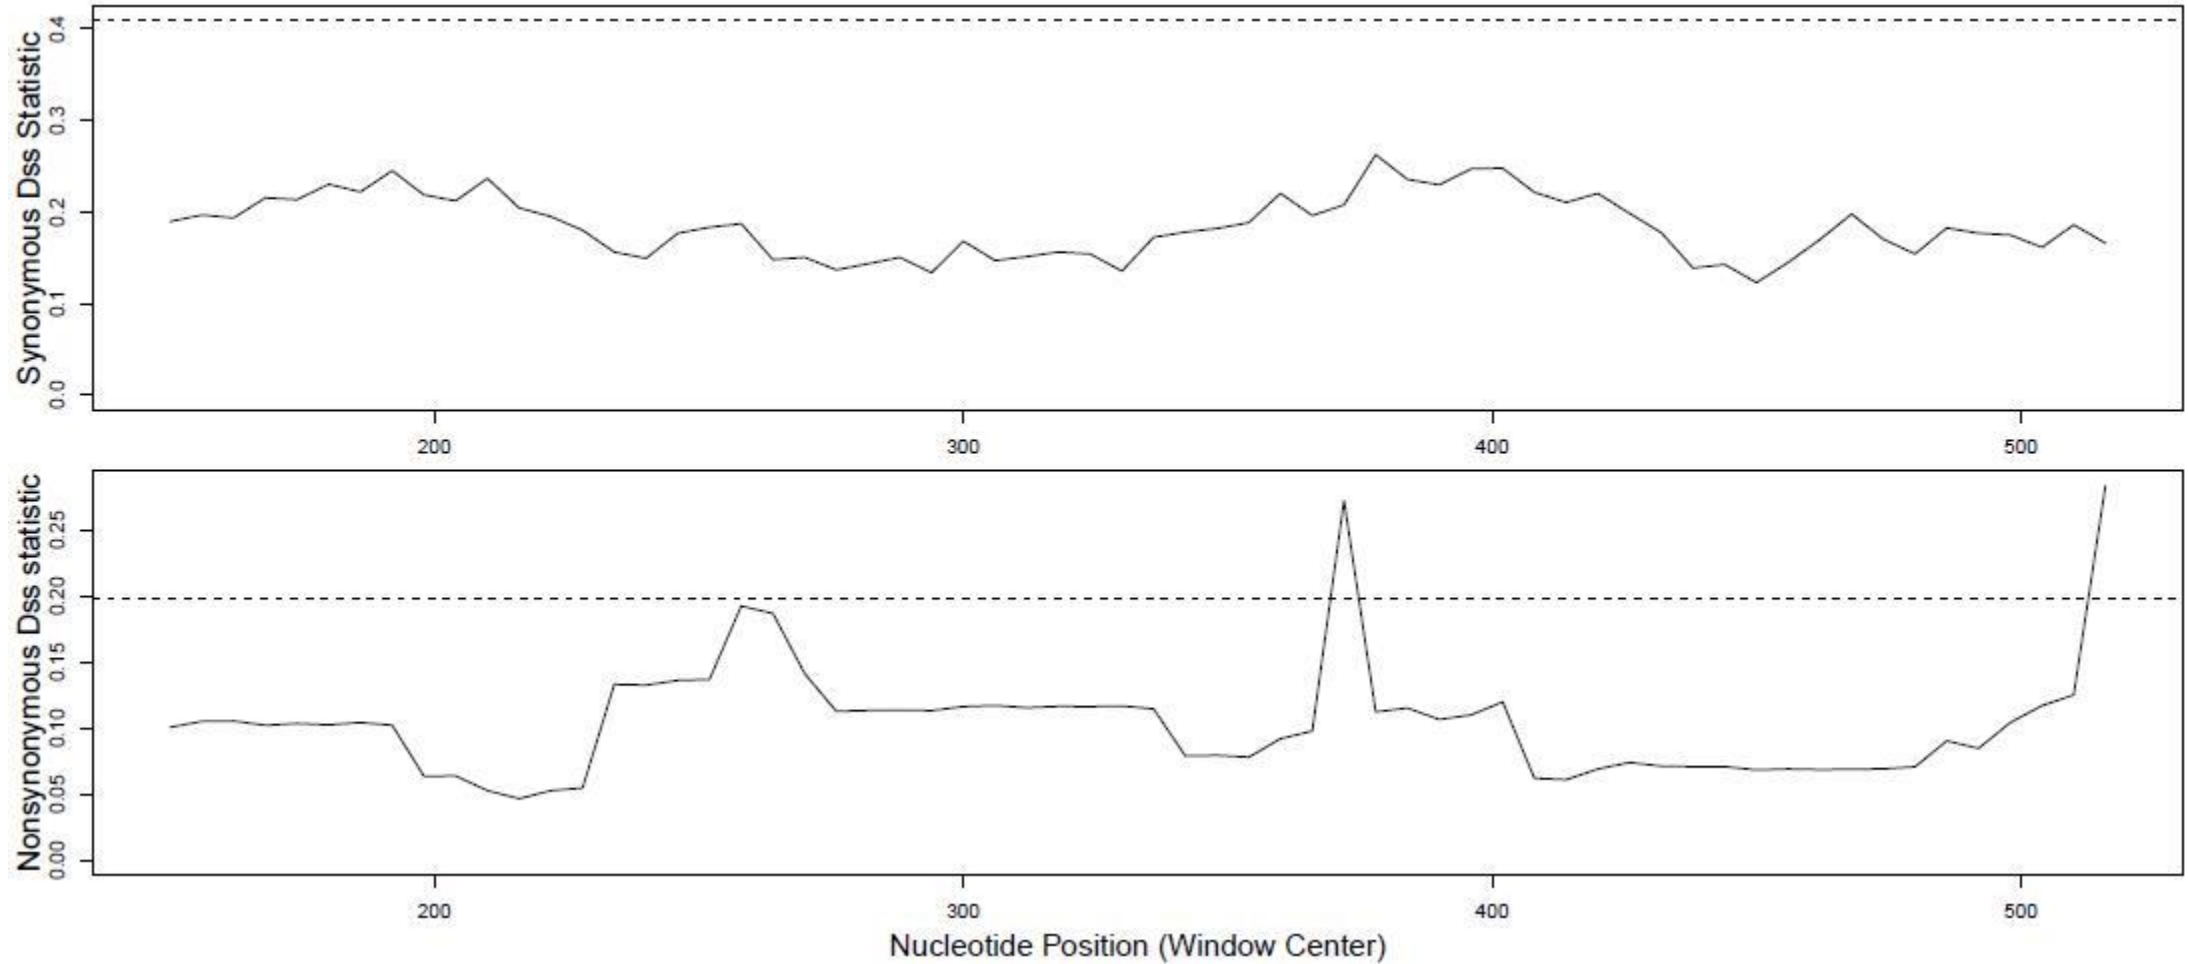

Dss statistic landscapes for synonymous and nonsynonymous changes. Dotted horizontal lines represent the 95% significance level for each test, from a parametric bootstrap with 500 replicates.

(B) 25 randomly selected core genes designated as **non-recombinants** by PhiPack (CONTD.)

HP\_0274

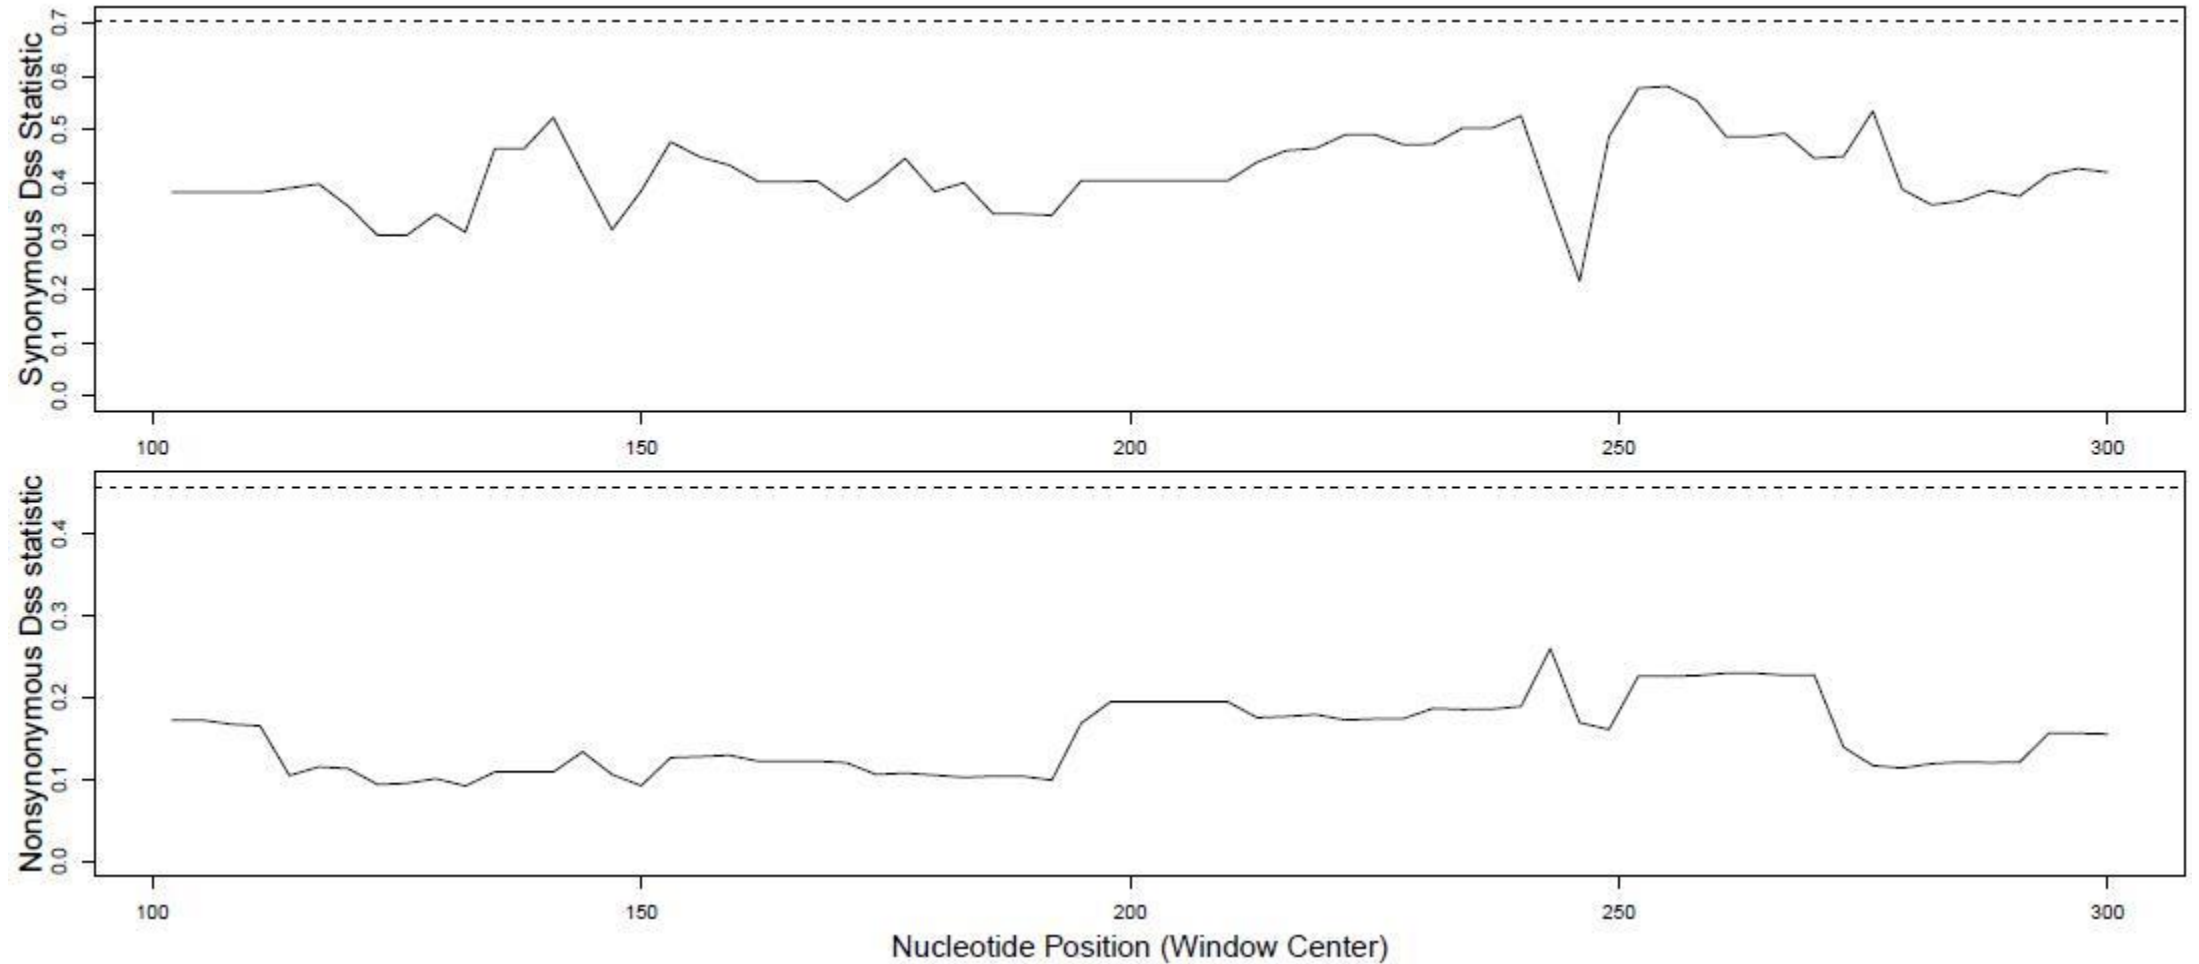

Dss statistic landscapes for synonymous and nonsynonymous changes. Dotted horizontal lines represent the 95% significance level for each test, from a parametric bootstrap with 500 replicates.



(B) 25 randomly selected core genes designated as **non-recombinants** by PhiPack (CONTD.)

HP\_0299

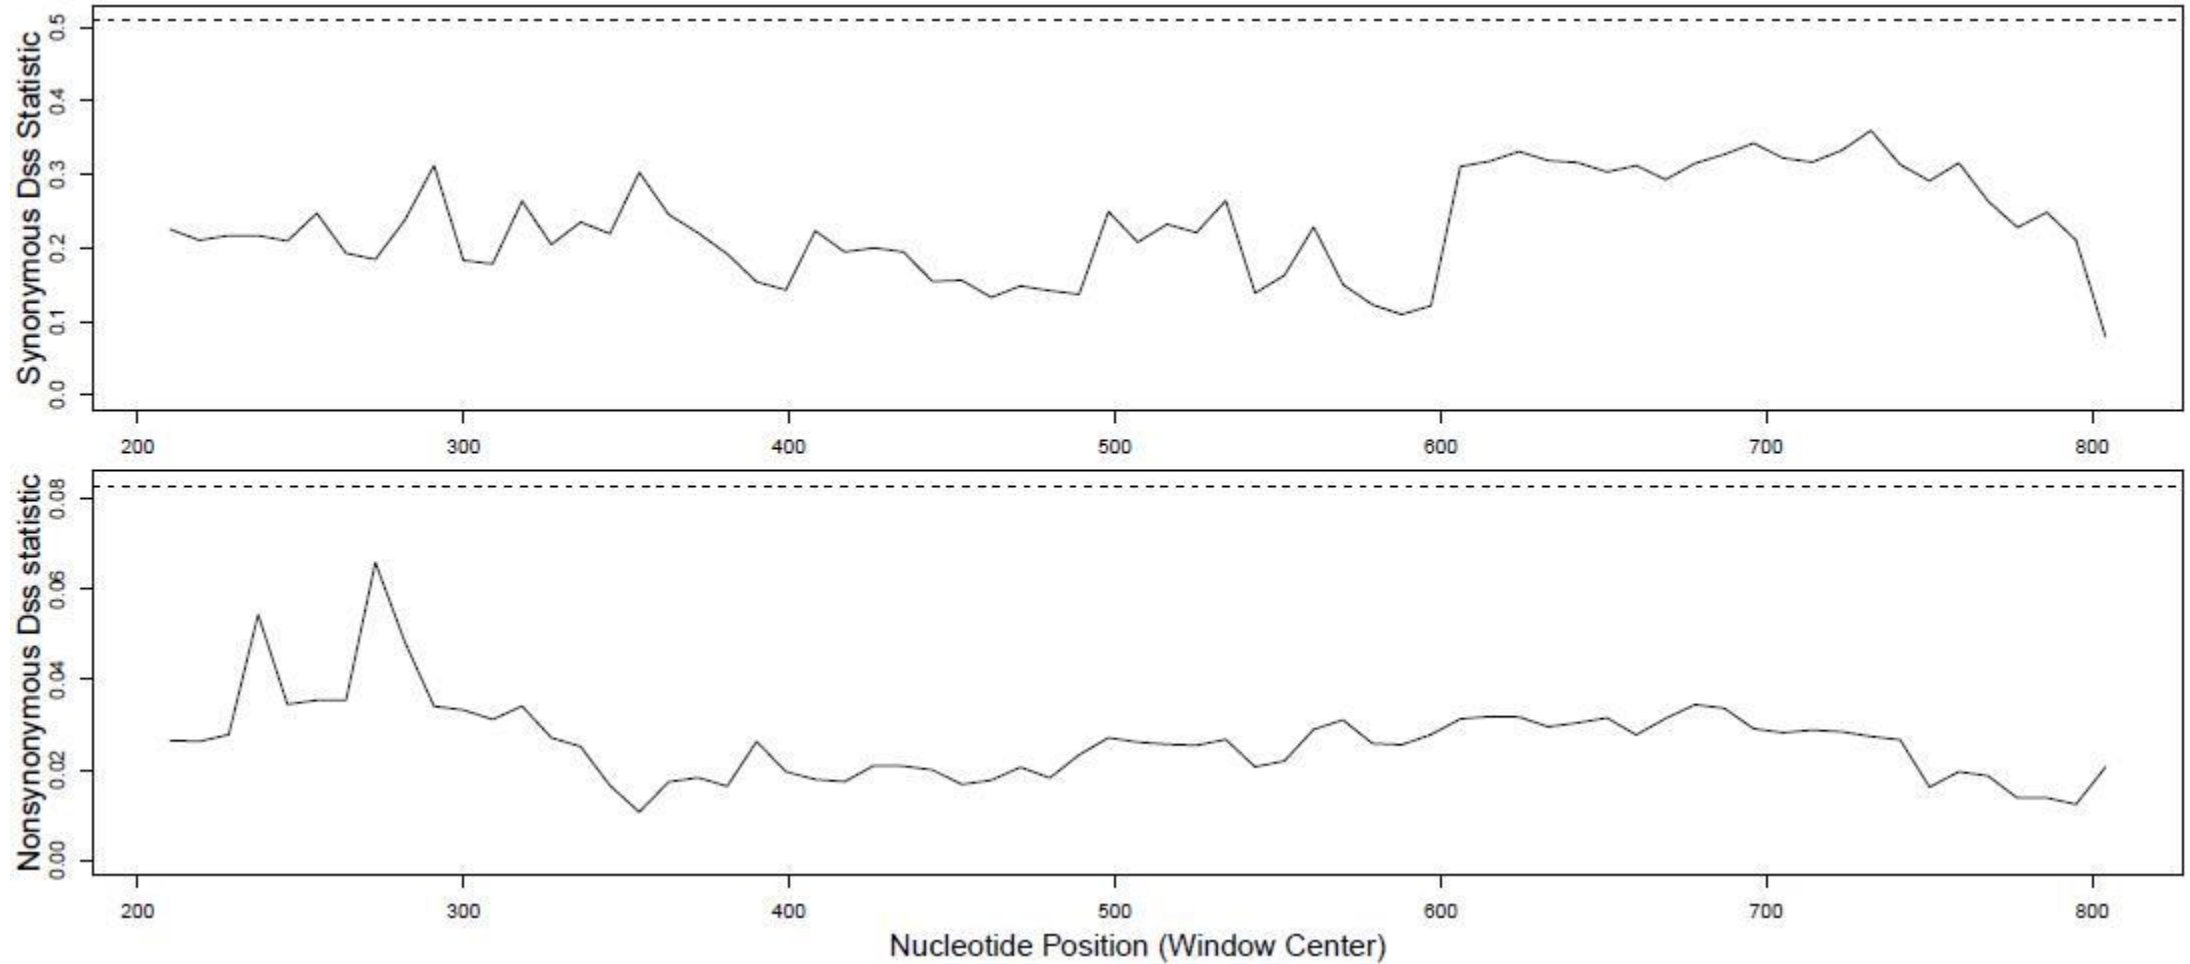

Dss statistic landscapes for synonymous and nonsynonymous changes. Dotted horizontal lines represent the 95% significance level for each test, from a parametric bootstrap with 500 replicates.

(B) 25 randomly selected core genes designated as **non-recombinants** by PhiPack (CONTD.)

HP\_0380

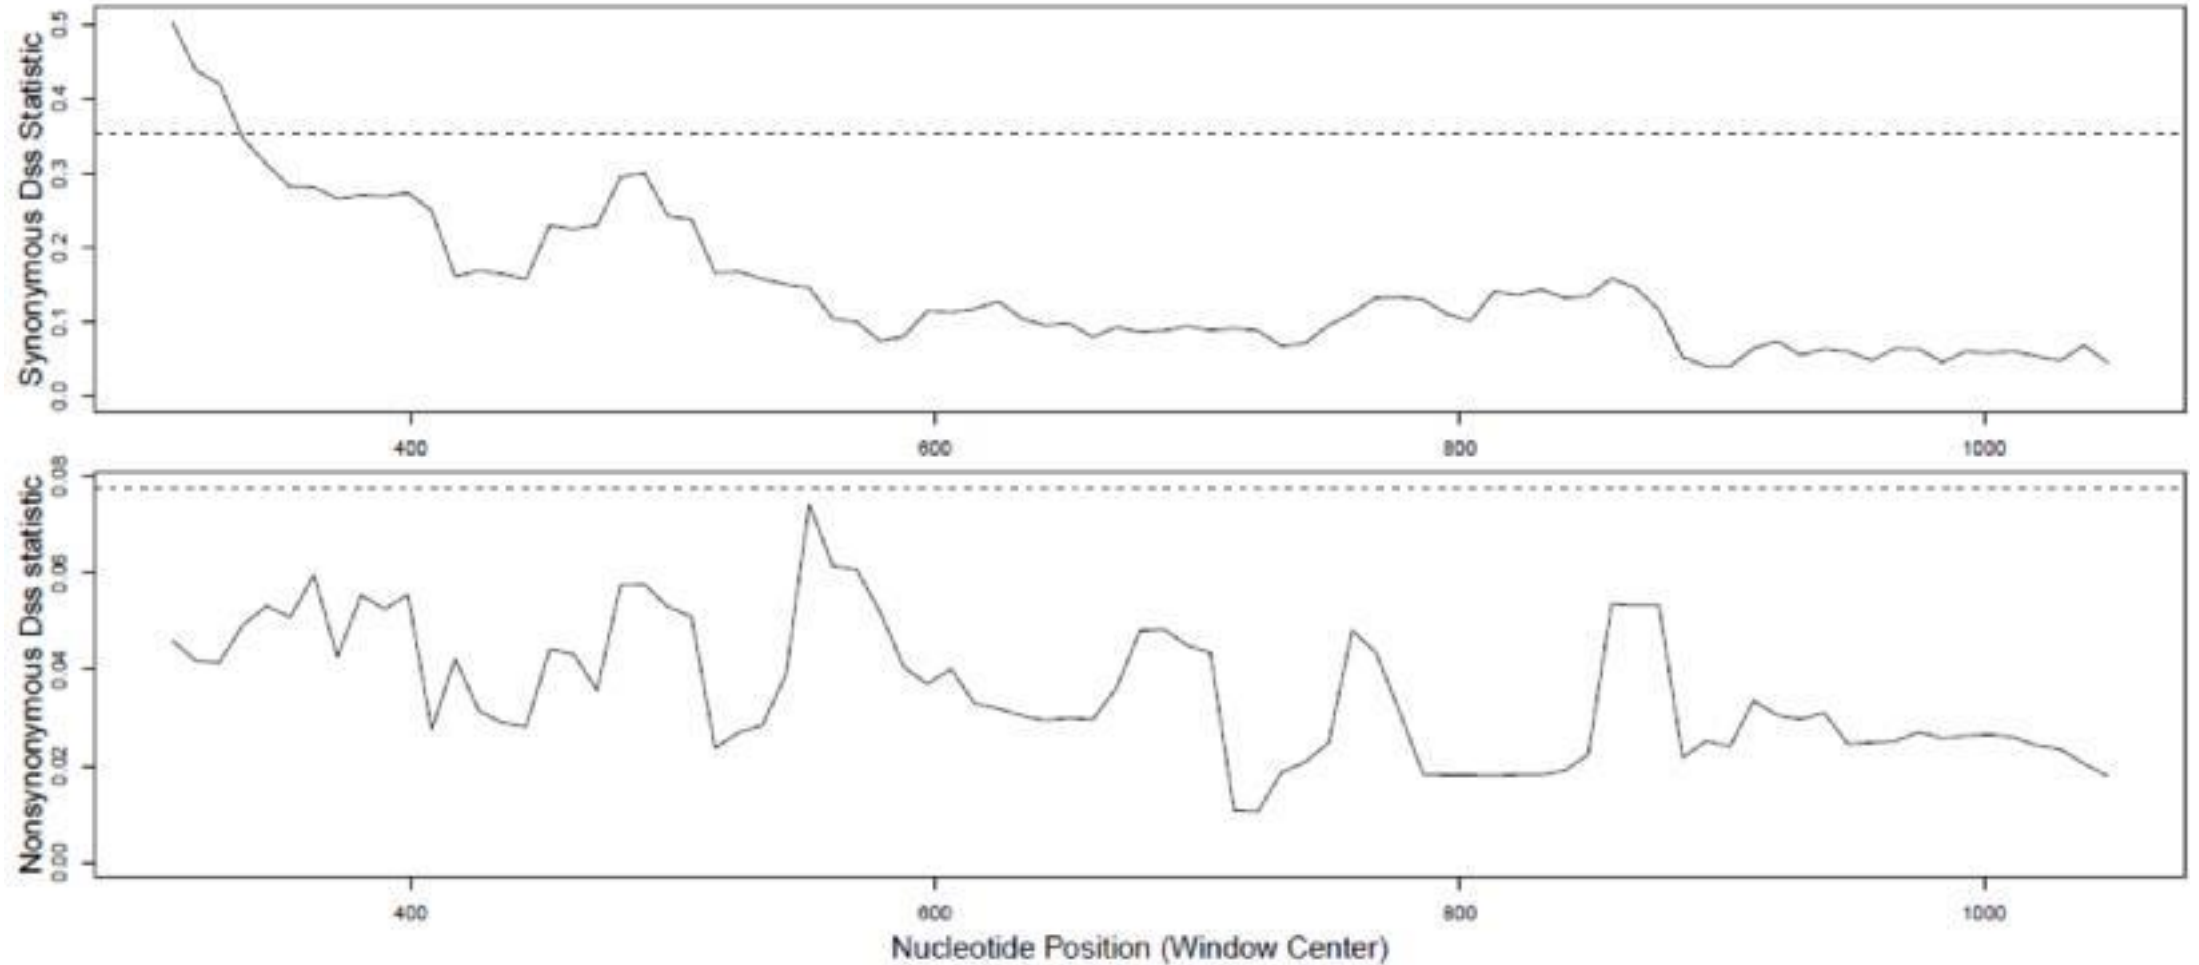

Dss statistic landscapes for synonymous and nonsynonymous changes. Dotted horizontal lines represent the 95% significance level for each test, from a parametric bootstrap with 500 replicates.

(B) 25 randomly selected core genes designated as **non-recombinants** by PhiPack (CONTD.)

HP\_0420

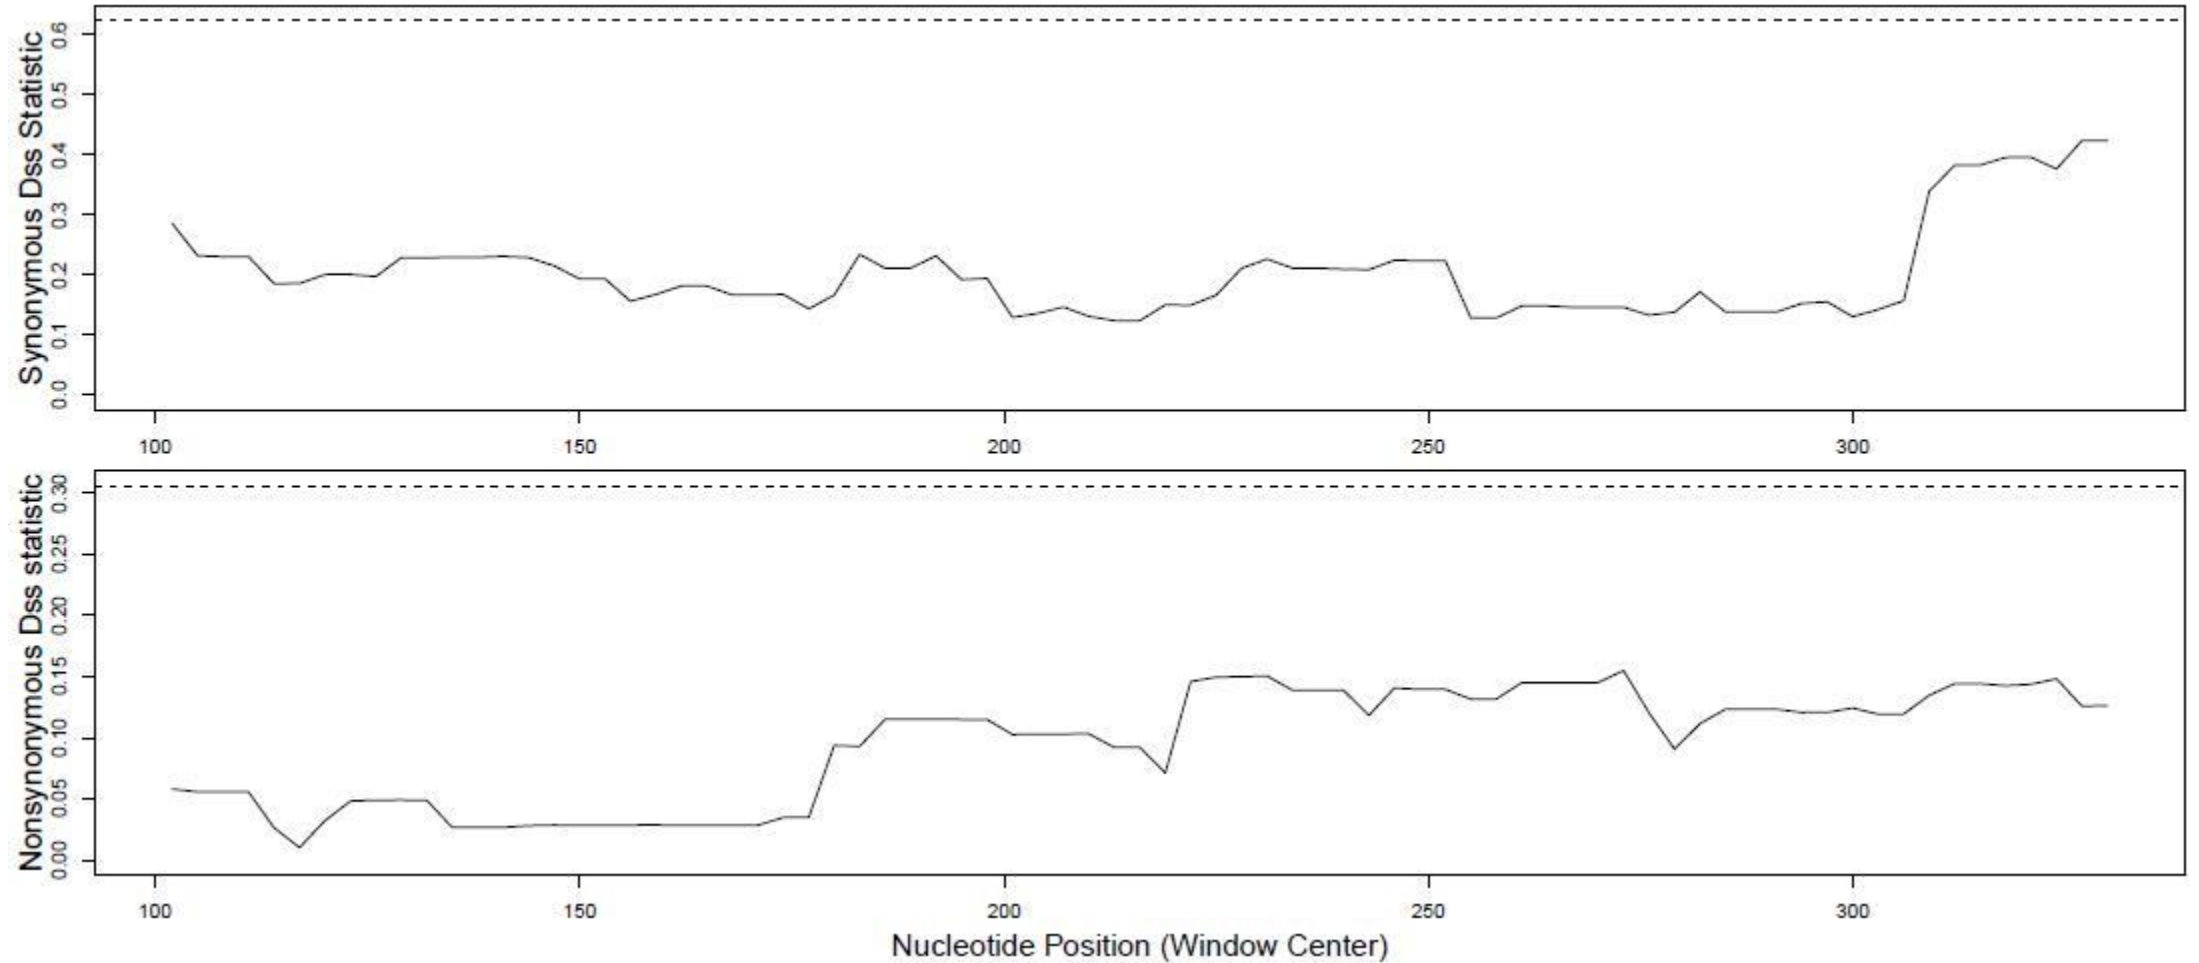

Dss statistic landscapes for synonymous and nonsynonymous changes. Dotted horizontal lines represent the 95% significance level for each test, from a parametric bootstrap with 500 replicates.

(B) 25 randomly selected core genes designated as **non-recombinants** by PhiPack (CONTD.)

HP\_0736

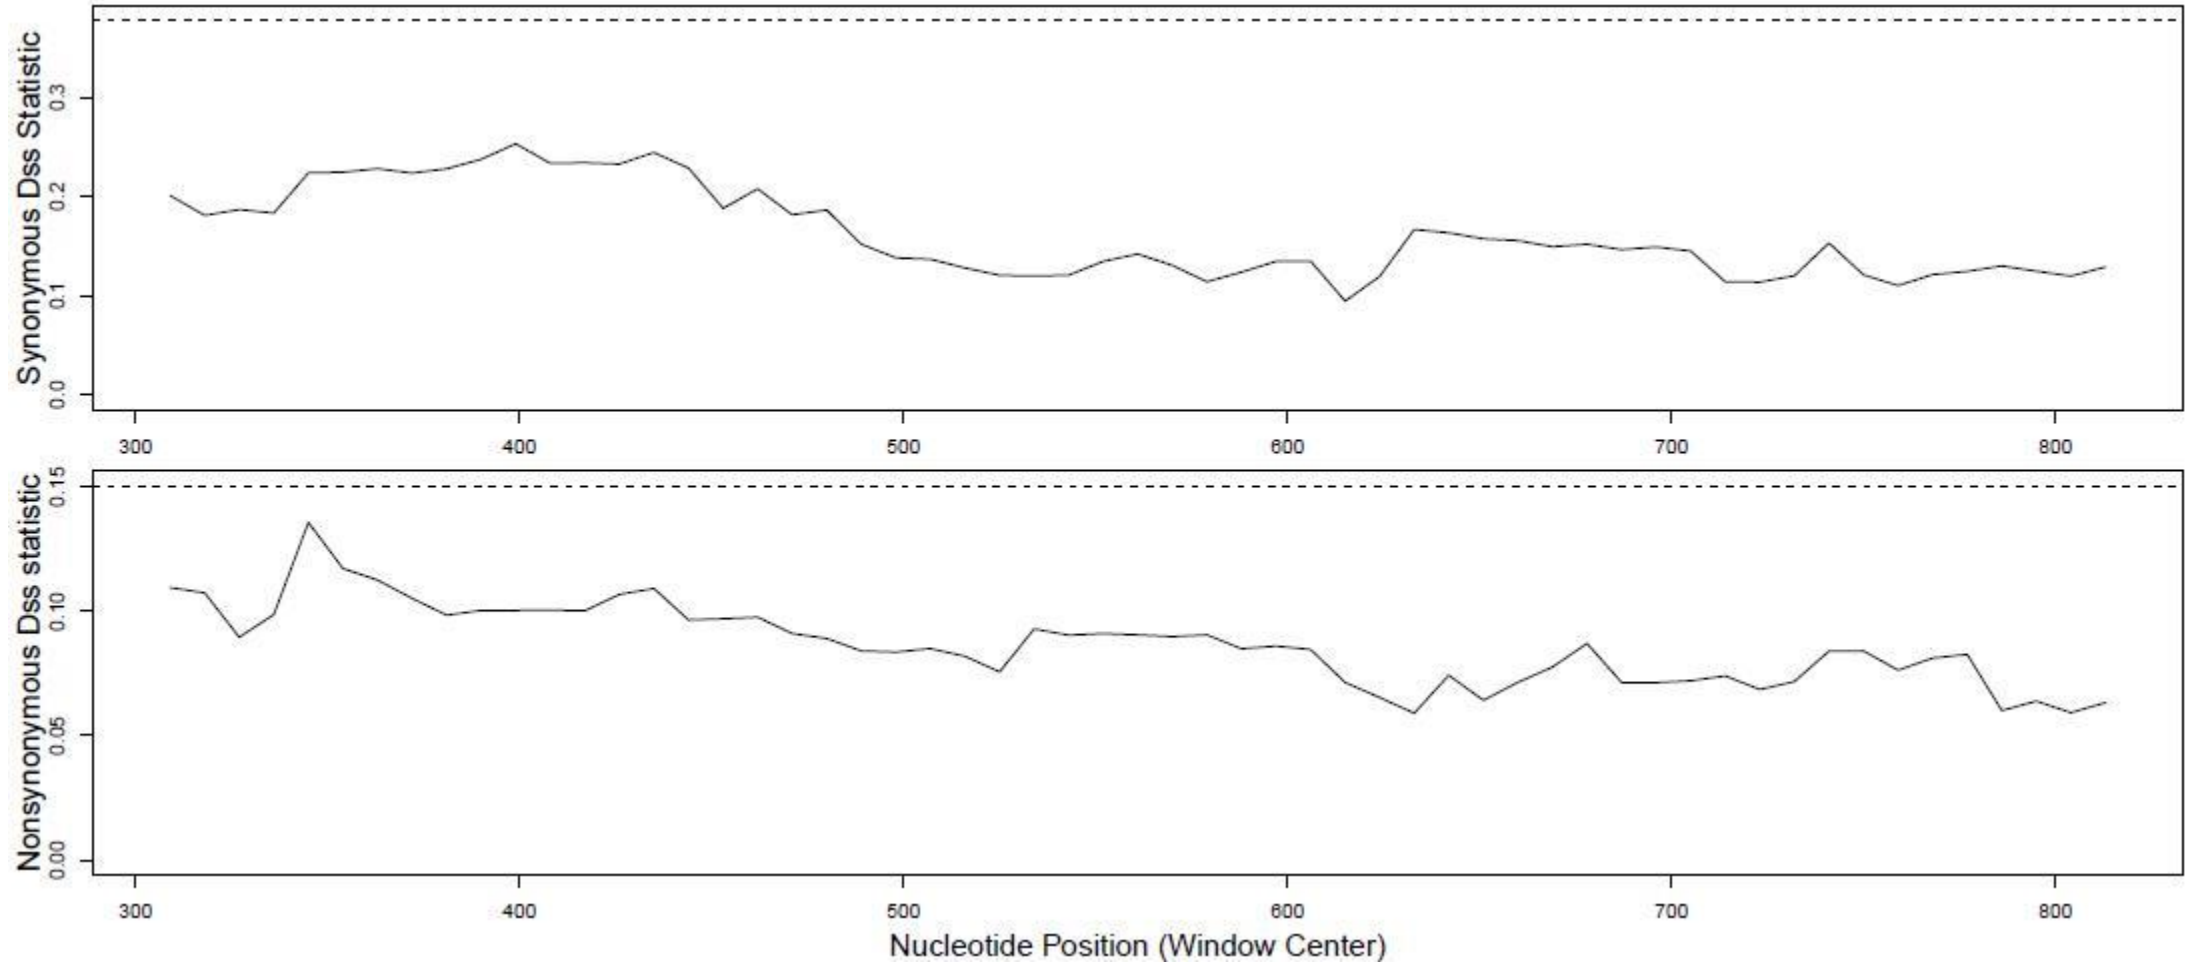

Dss statistic landscapes for synonymous and nonsynonymous changes. Dotted horizontal lines represent the 95% significance level for each test, from a parametric bootstrap with 500 replicates.

(B) 25 randomly selected core genes designated as **non-recombinants** by PhiPack (CONTD.)

HP\_0742

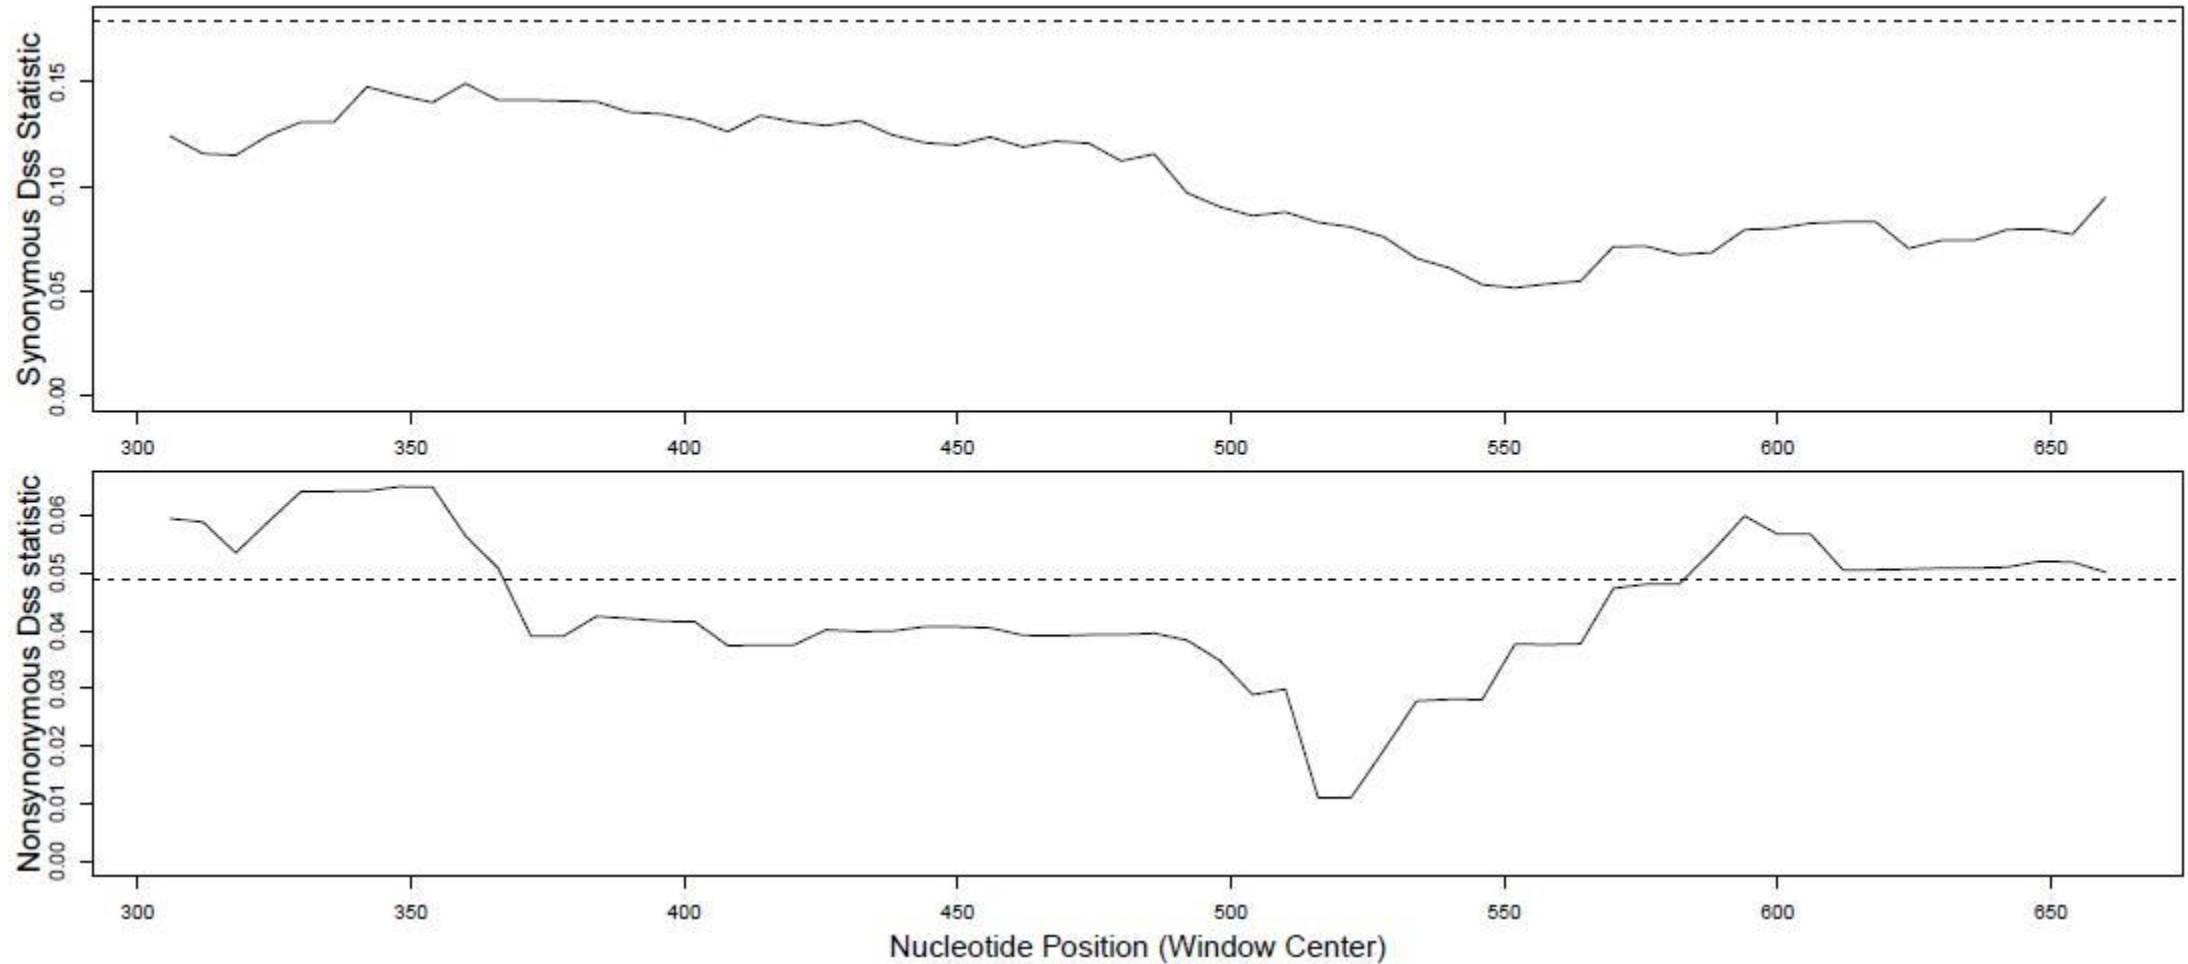

Dss statistic landscapes for synonymous and nonsynonymous changes. Dotted horizontal lines represent the 95% significance level for each test, from a parametric bootstrap with 500 replicates.

(B) 25 randomly selected core genes designated as **non-recombinants** by PhiPack (CONTD.)

HP\_0771

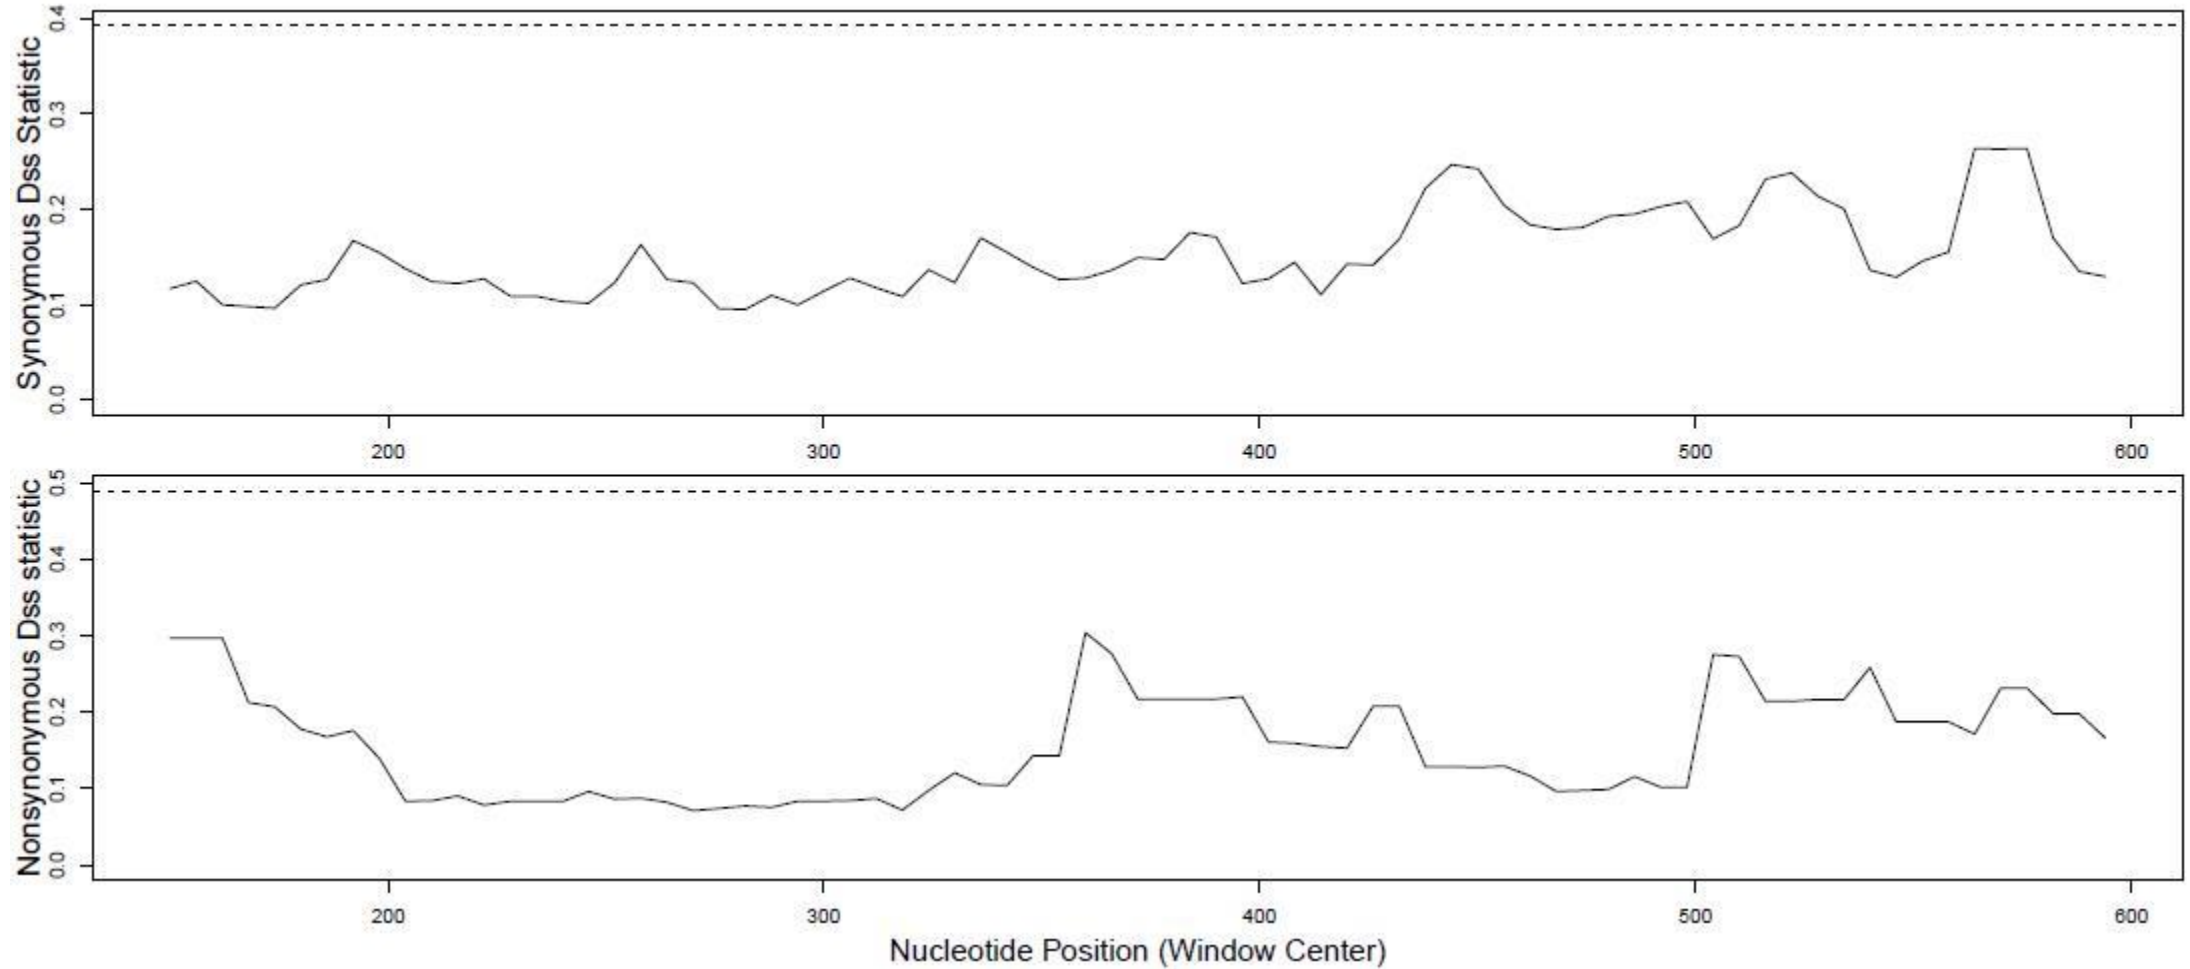

Dss statistic landscapes for synonymous and nonsynonymous changes. Dotted horizontal lines represent the 95% significance level for each test, from a parametric bootstrap with 500 replicates.

(B) 25 randomly selected core genes designated as **non-recombinants** by PhiPack (CONTD.)

HP\_0884

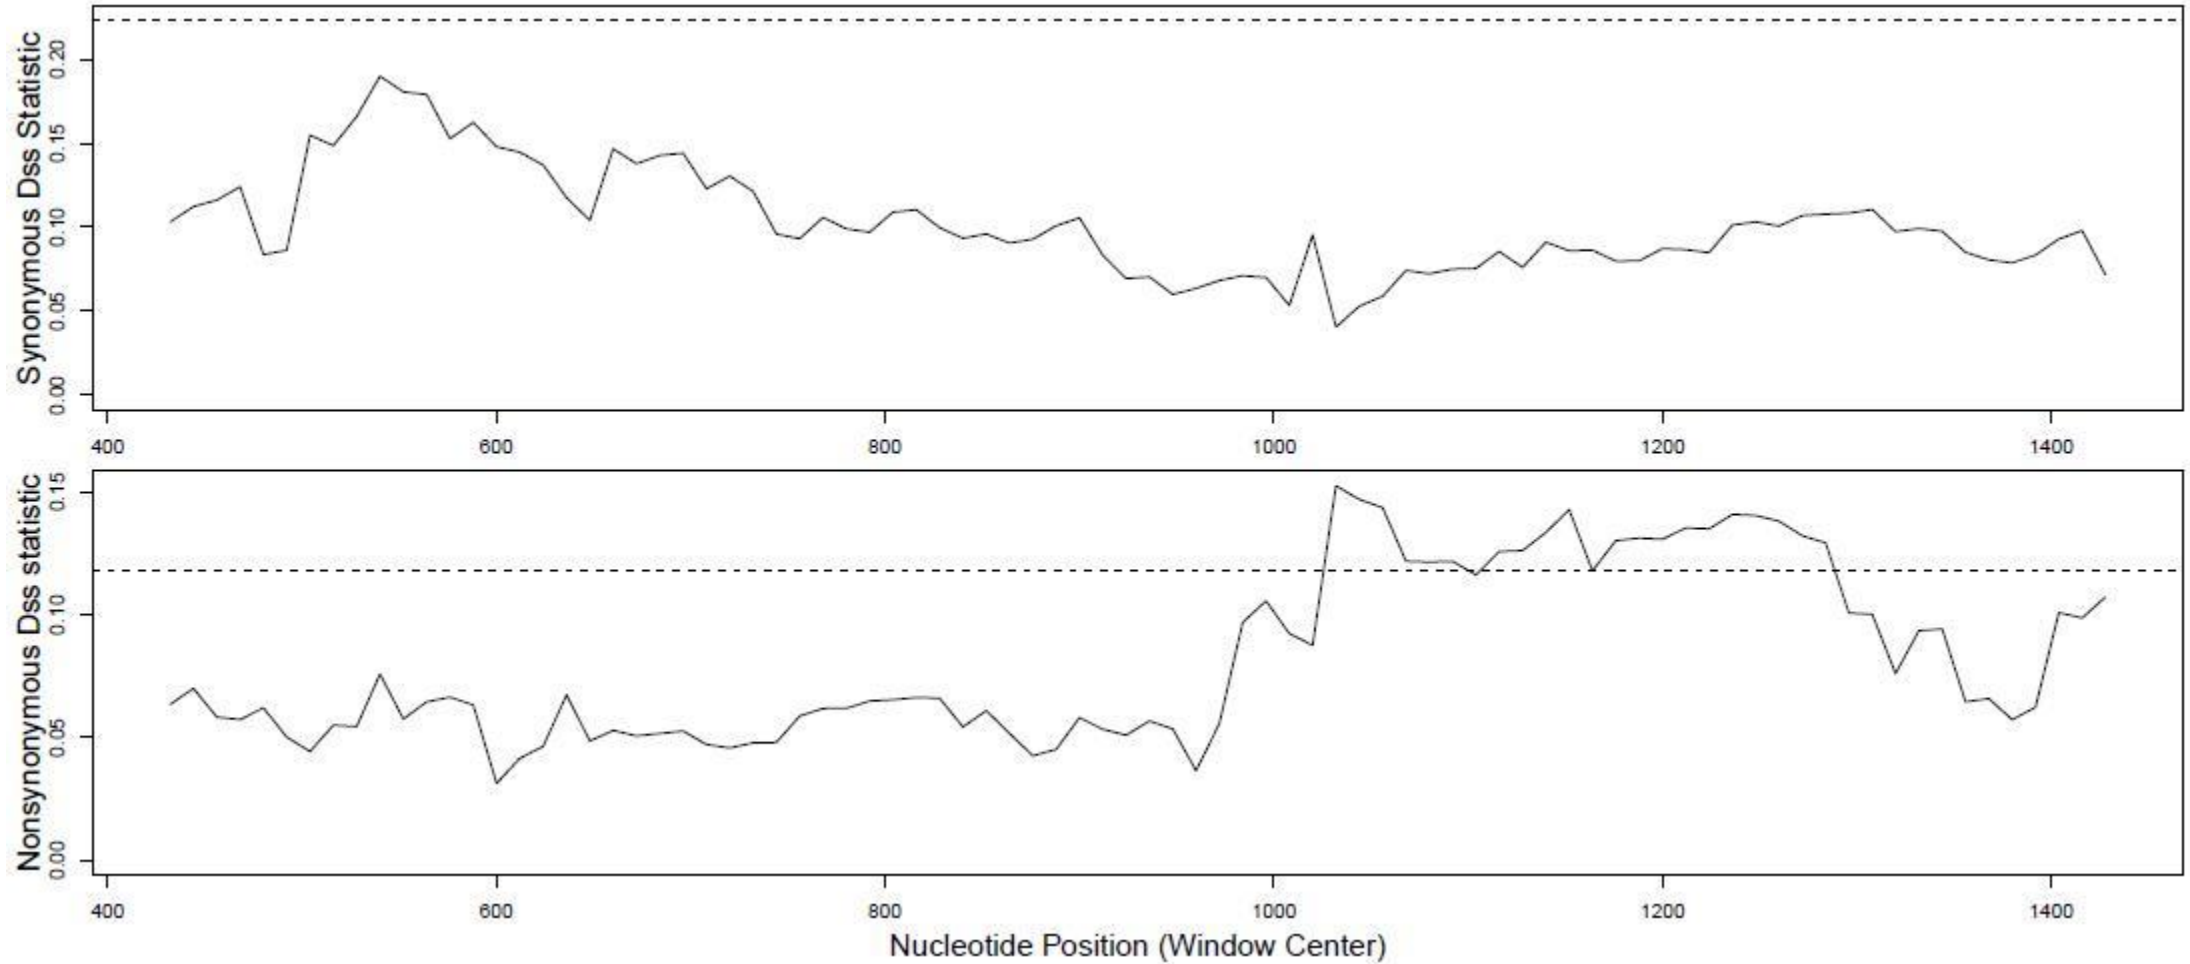

Dss statistic landscapes for synonymous and nonsynonymous changes. Dotted horizontal lines represent the 95% significance level for each test, from a parametric bootstrap with 500 replicates.

(B) 25 randomly selected core genes designated as **non-recombinants** by PhiPack (CONTD.)

HP\_0908

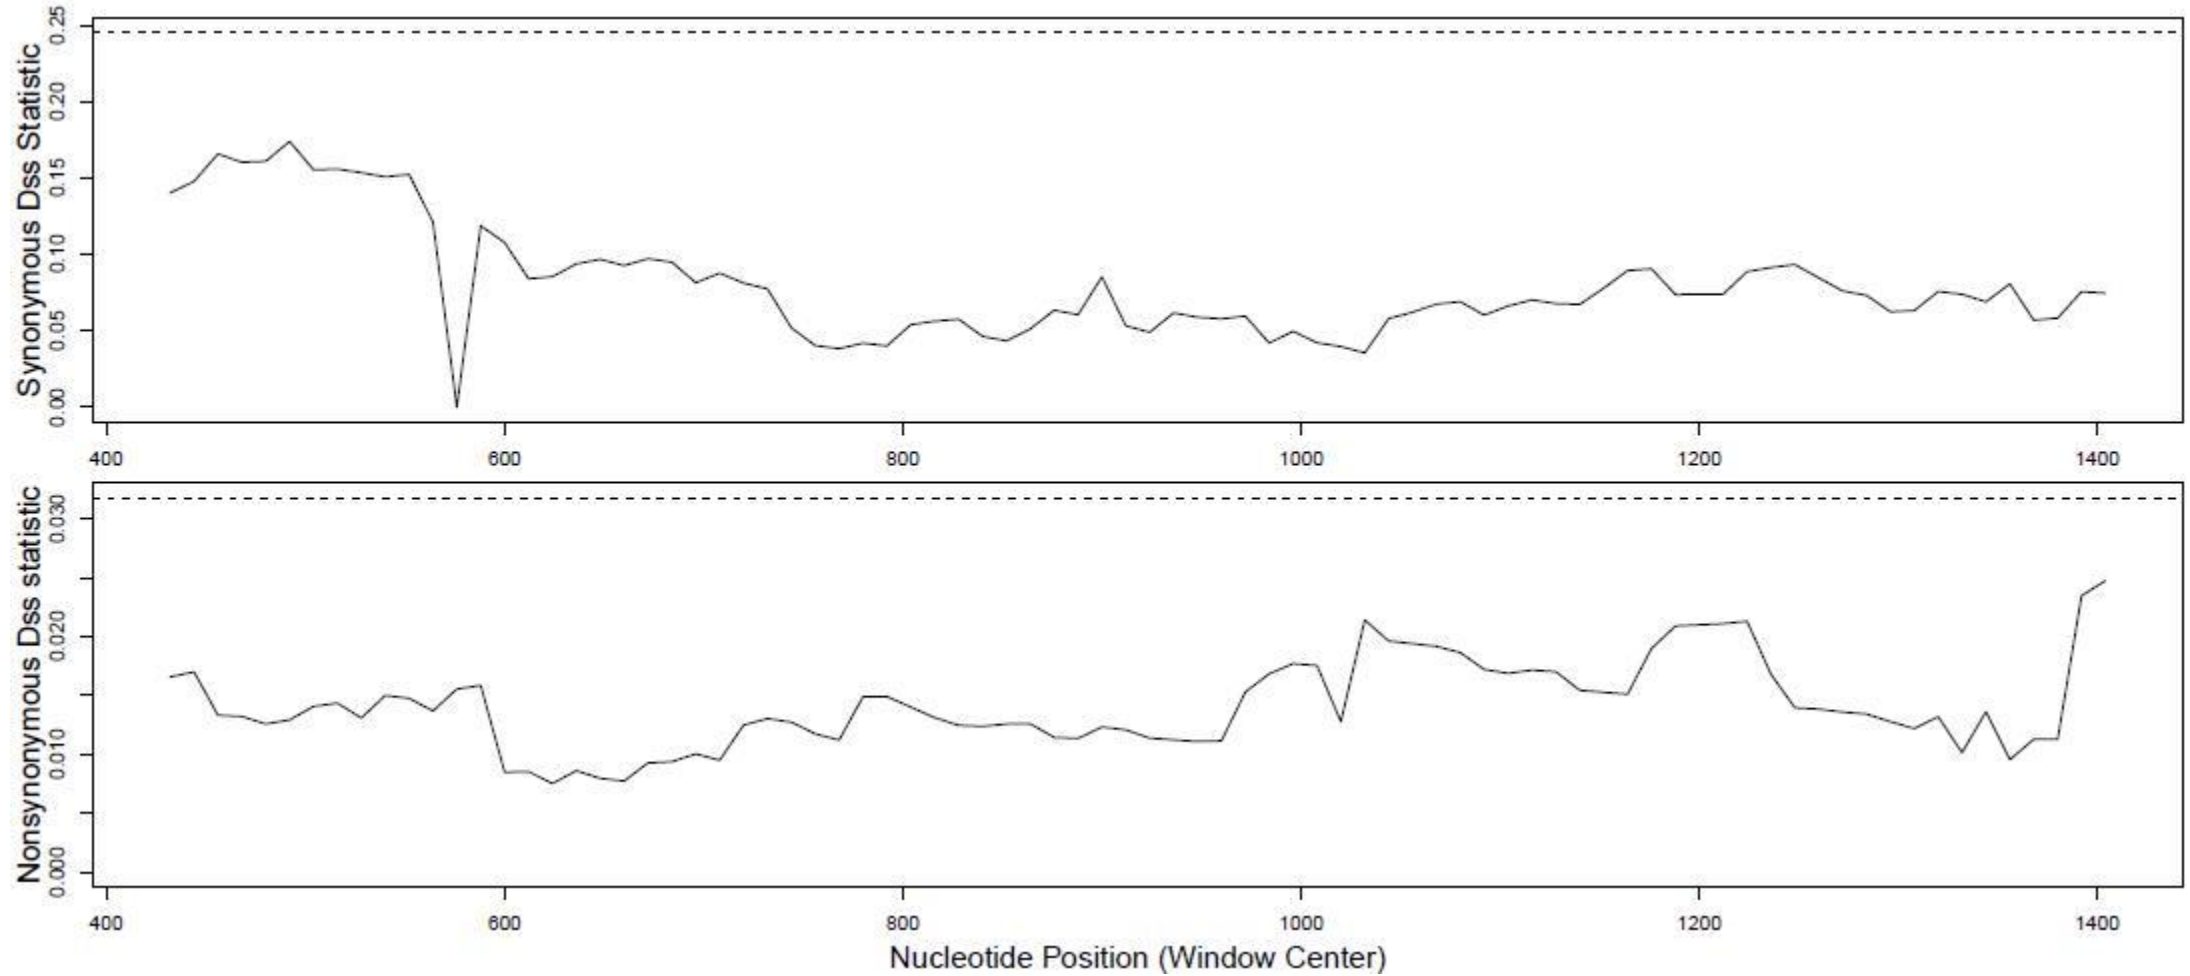

Dss statistic landscapes for synonymous and nonsynonymous changes. Dotted horizontal lines represent the 95% significance level for each test, from a parametric bootstrap with 500 replicates.



(B) 25 randomly selected core genes designated as **non-recombinants** by PhiPack (CONTD.)

HP\_0933

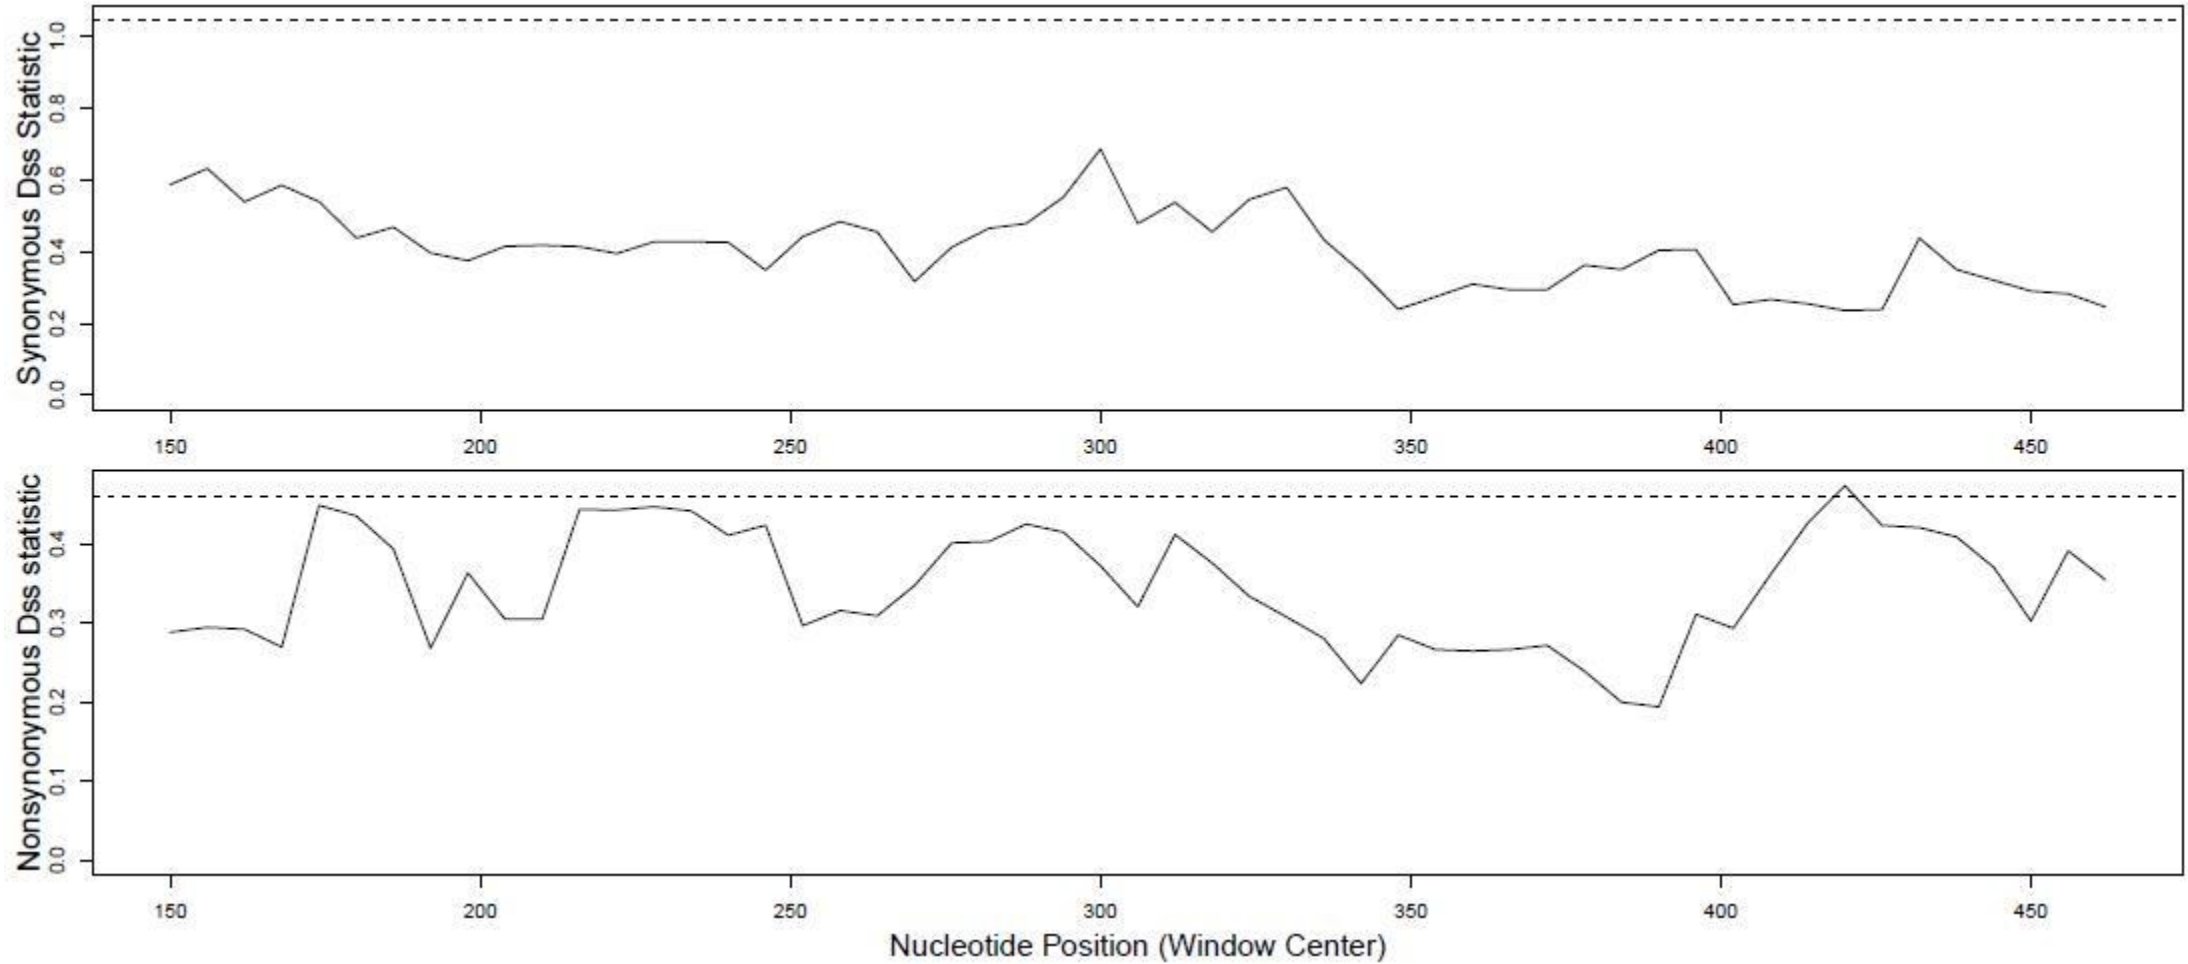

Dss statistic landscapes for synonymous and nonsynonymous changes. Dotted horizontal lines represent the 95% significance level for each test, from a parametric bootstrap with 500 replicates.

(B) 25 randomly selected core genes designated as **non-recombinants** by PhiPack (CONTD.)

HP\_0950

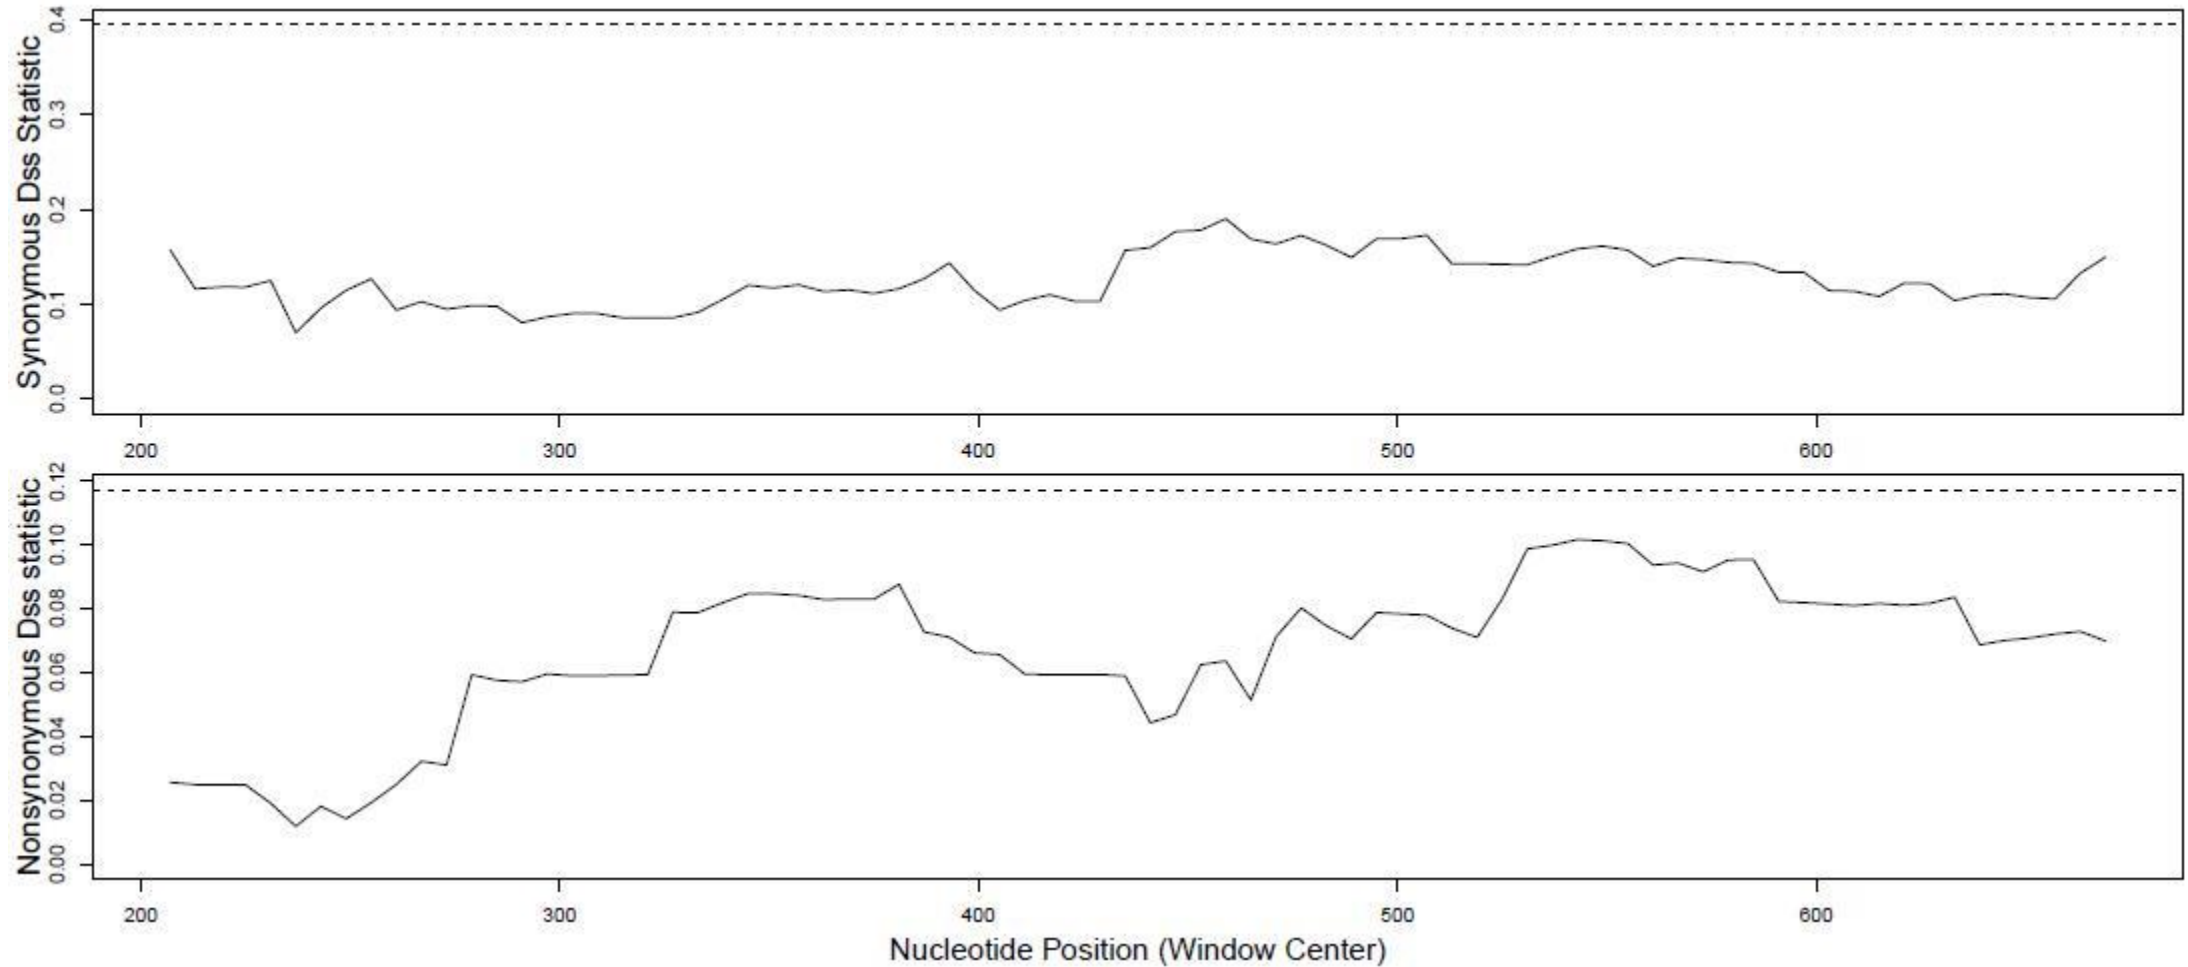

Dss statistic landscapes for synonymous and nonsynonymous changes. Dotted horizontal lines represent the 95% significance level for each test, from a parametric bootstrap with 500 replicates.

(B) 25 randomly selected core genes designated as **non-recombinants** by PhiPack (CONTD.)

HP\_0958

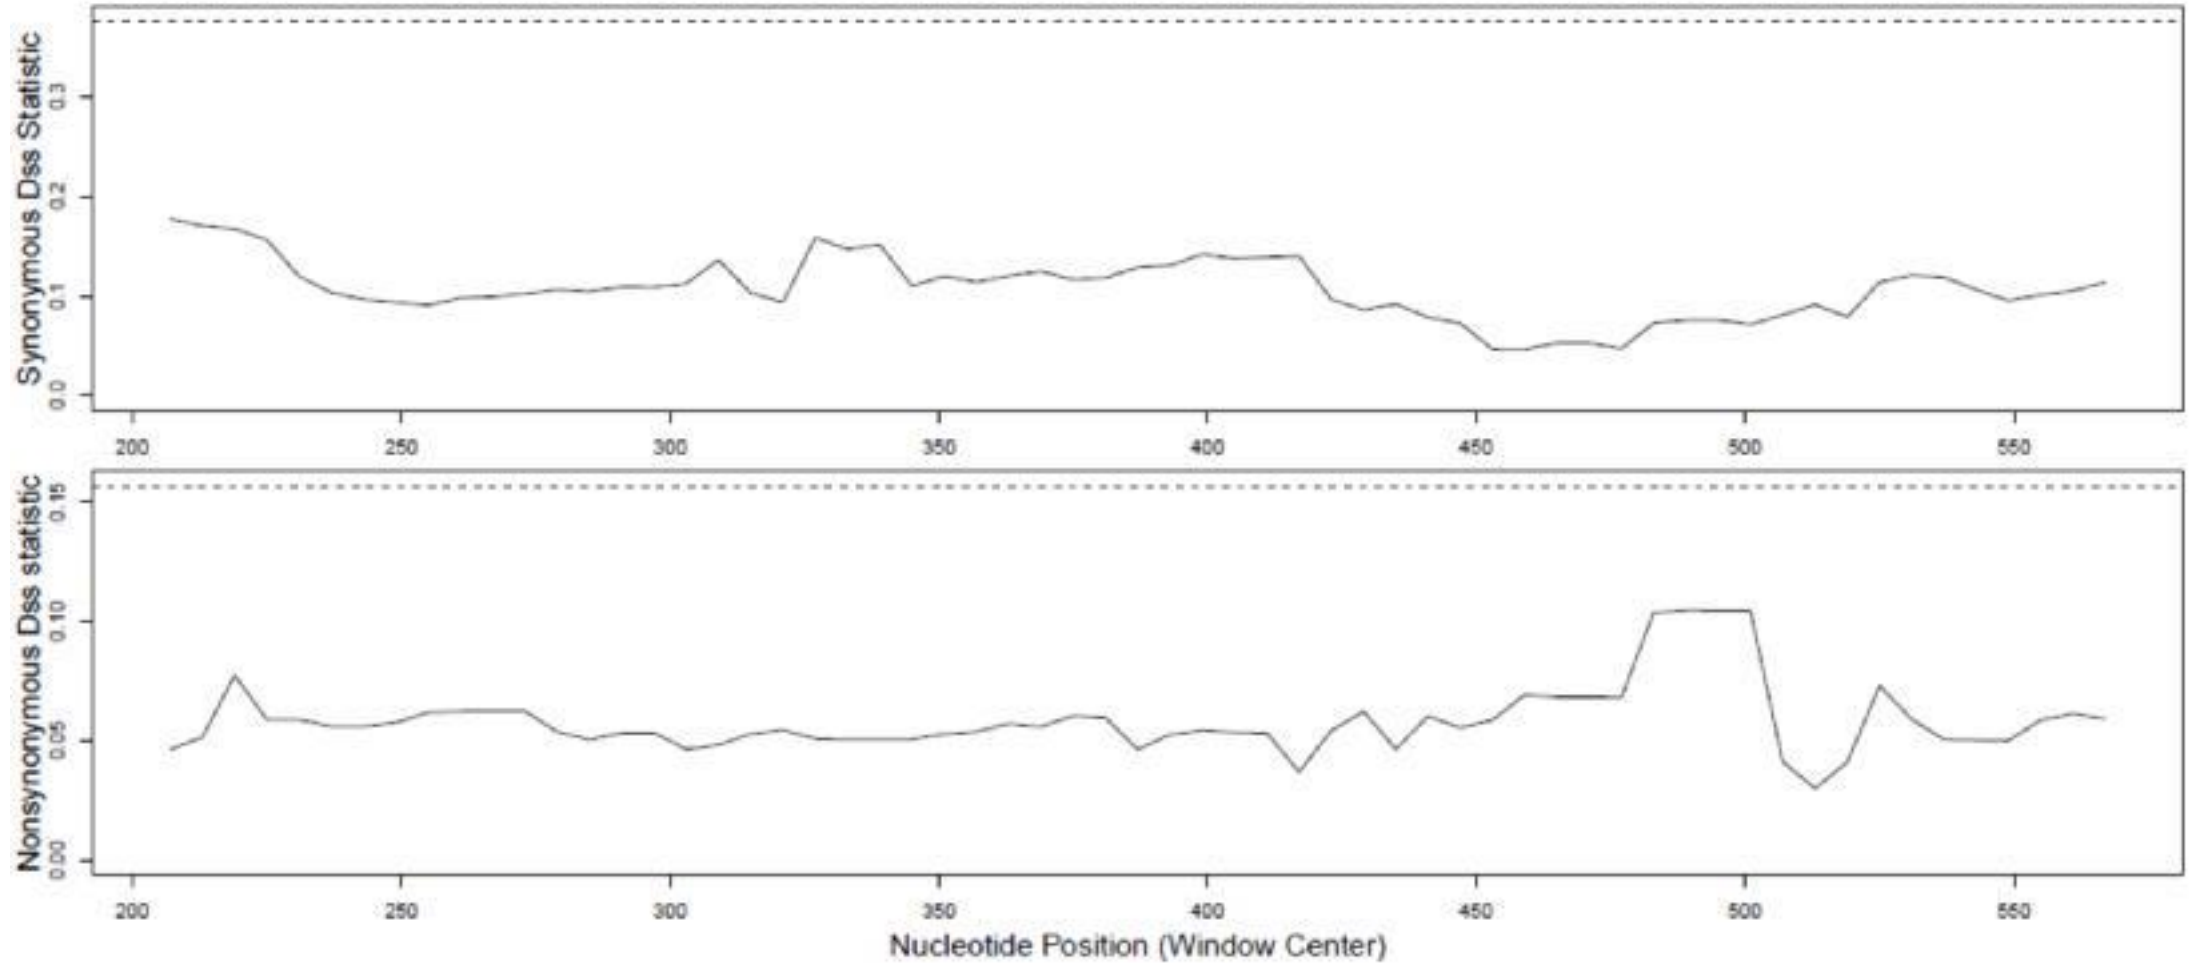

Dss statistic landscapes for synonymous and nonsynonymous changes. Dotted horizontal lines represent the 95% significance level for each test, from a parametric bootstrap with 500 replicates.

(B) 25 randomly selected core genes designated as **non-recombinants** by PhiPack (CONTD.)

HP\_1016

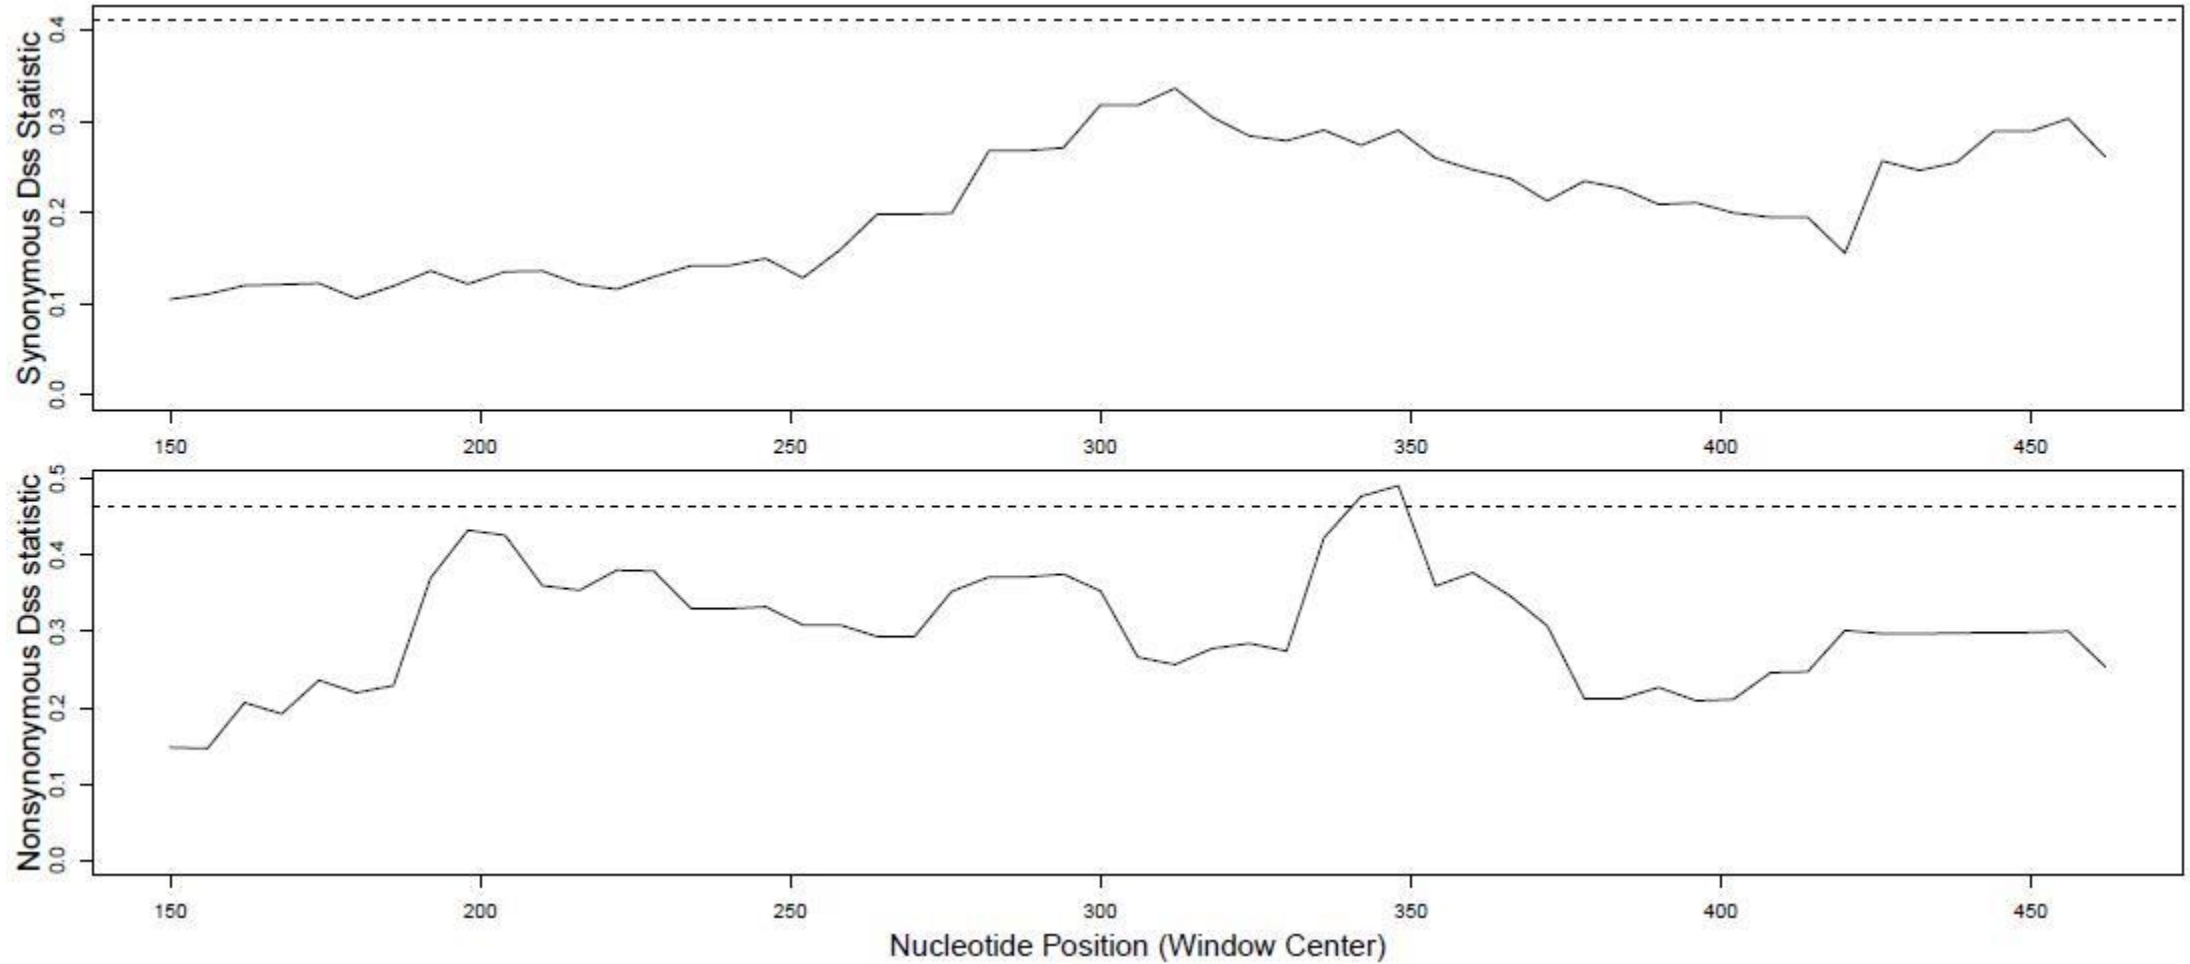

Dss statistic landscapes for synonymous and nonsynonymous changes. Dotted horizontal lines represent the 95% significance level for each test, from a parametric bootstrap with 500 replicates.

(B) 25 randomly selected core genes designated as **non-recombinants** by PhiPack (CONTD.)

HP\_1050

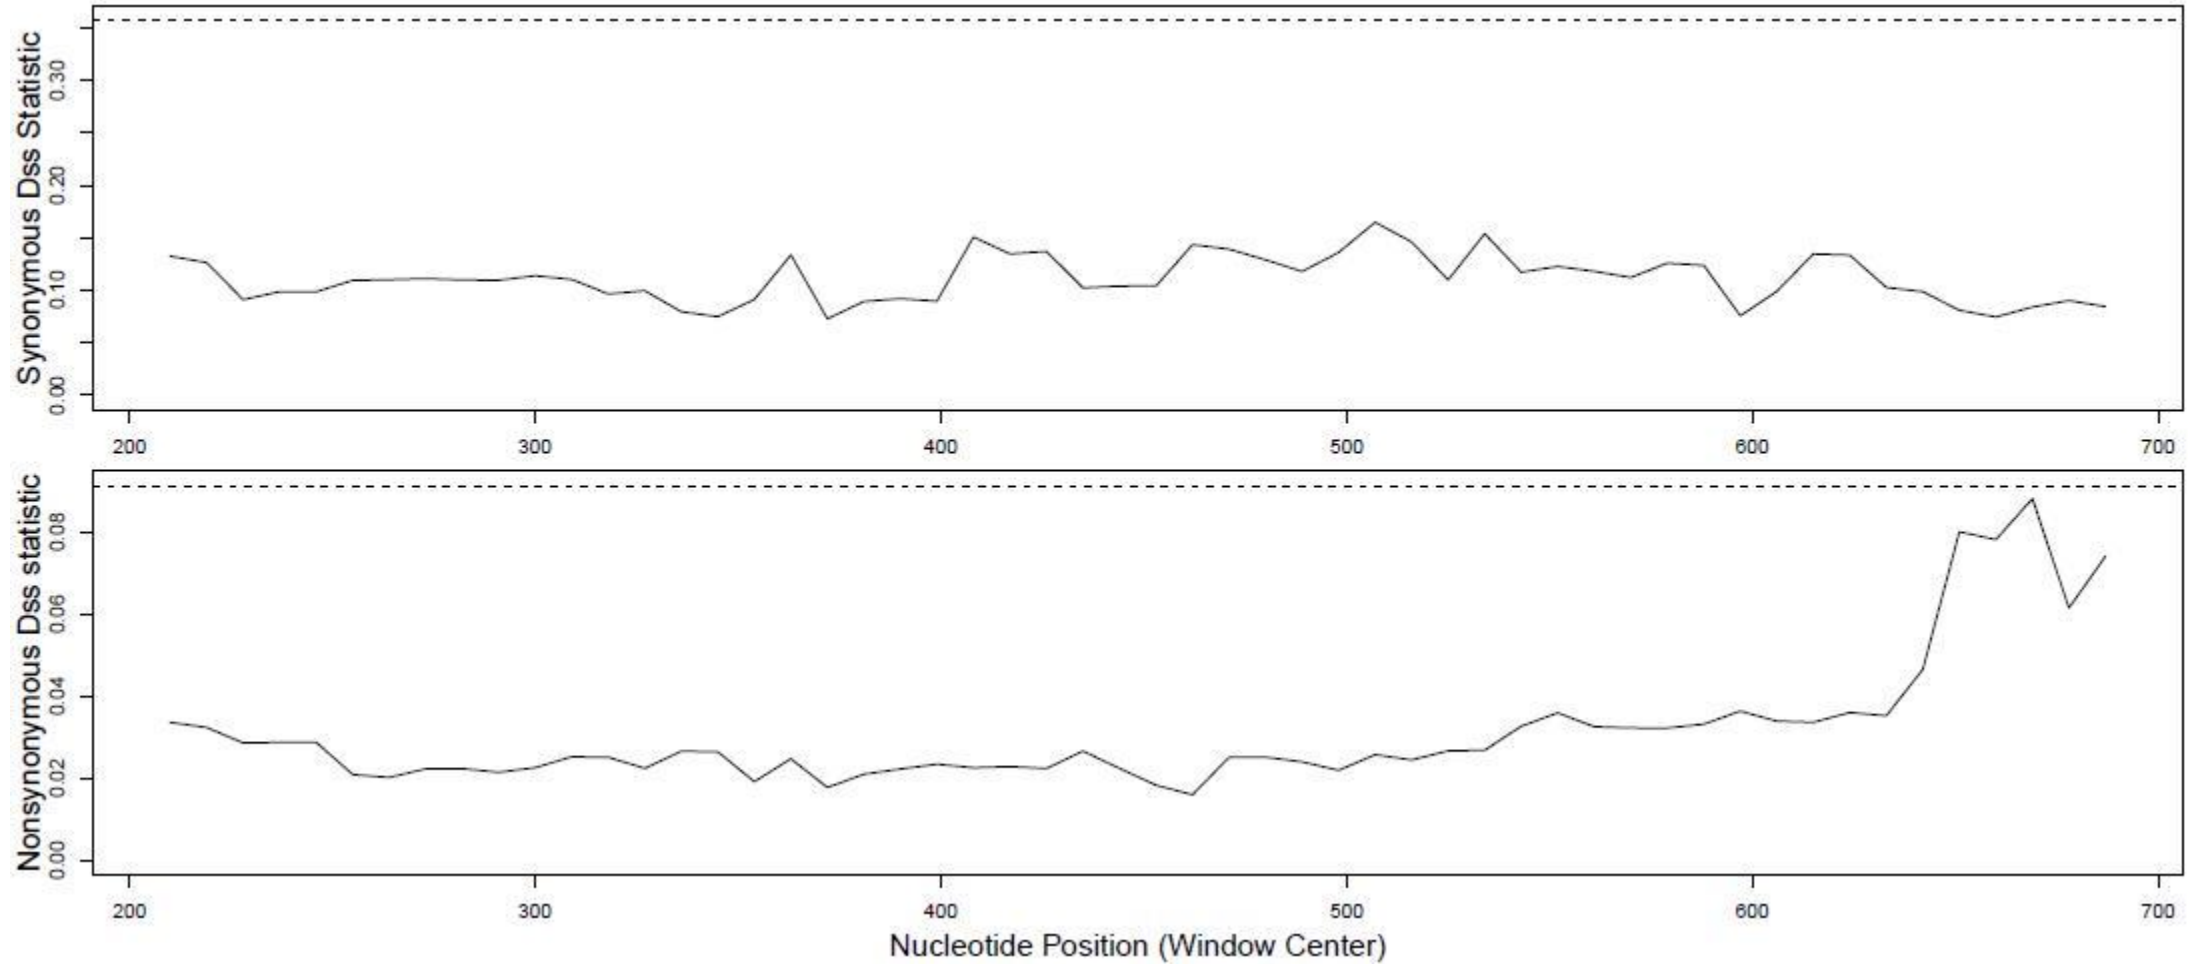

Dss statistic landscapes for synonymous and nonsynonymous changes. Dotted horizontal lines represent the 95% significance level for each test, from a parametric bootstrap with 500 replicates.

(B) 25 randomly selected core genes designated as **non-recombinants** by PhiPack (CONTD.)

HP\_1190

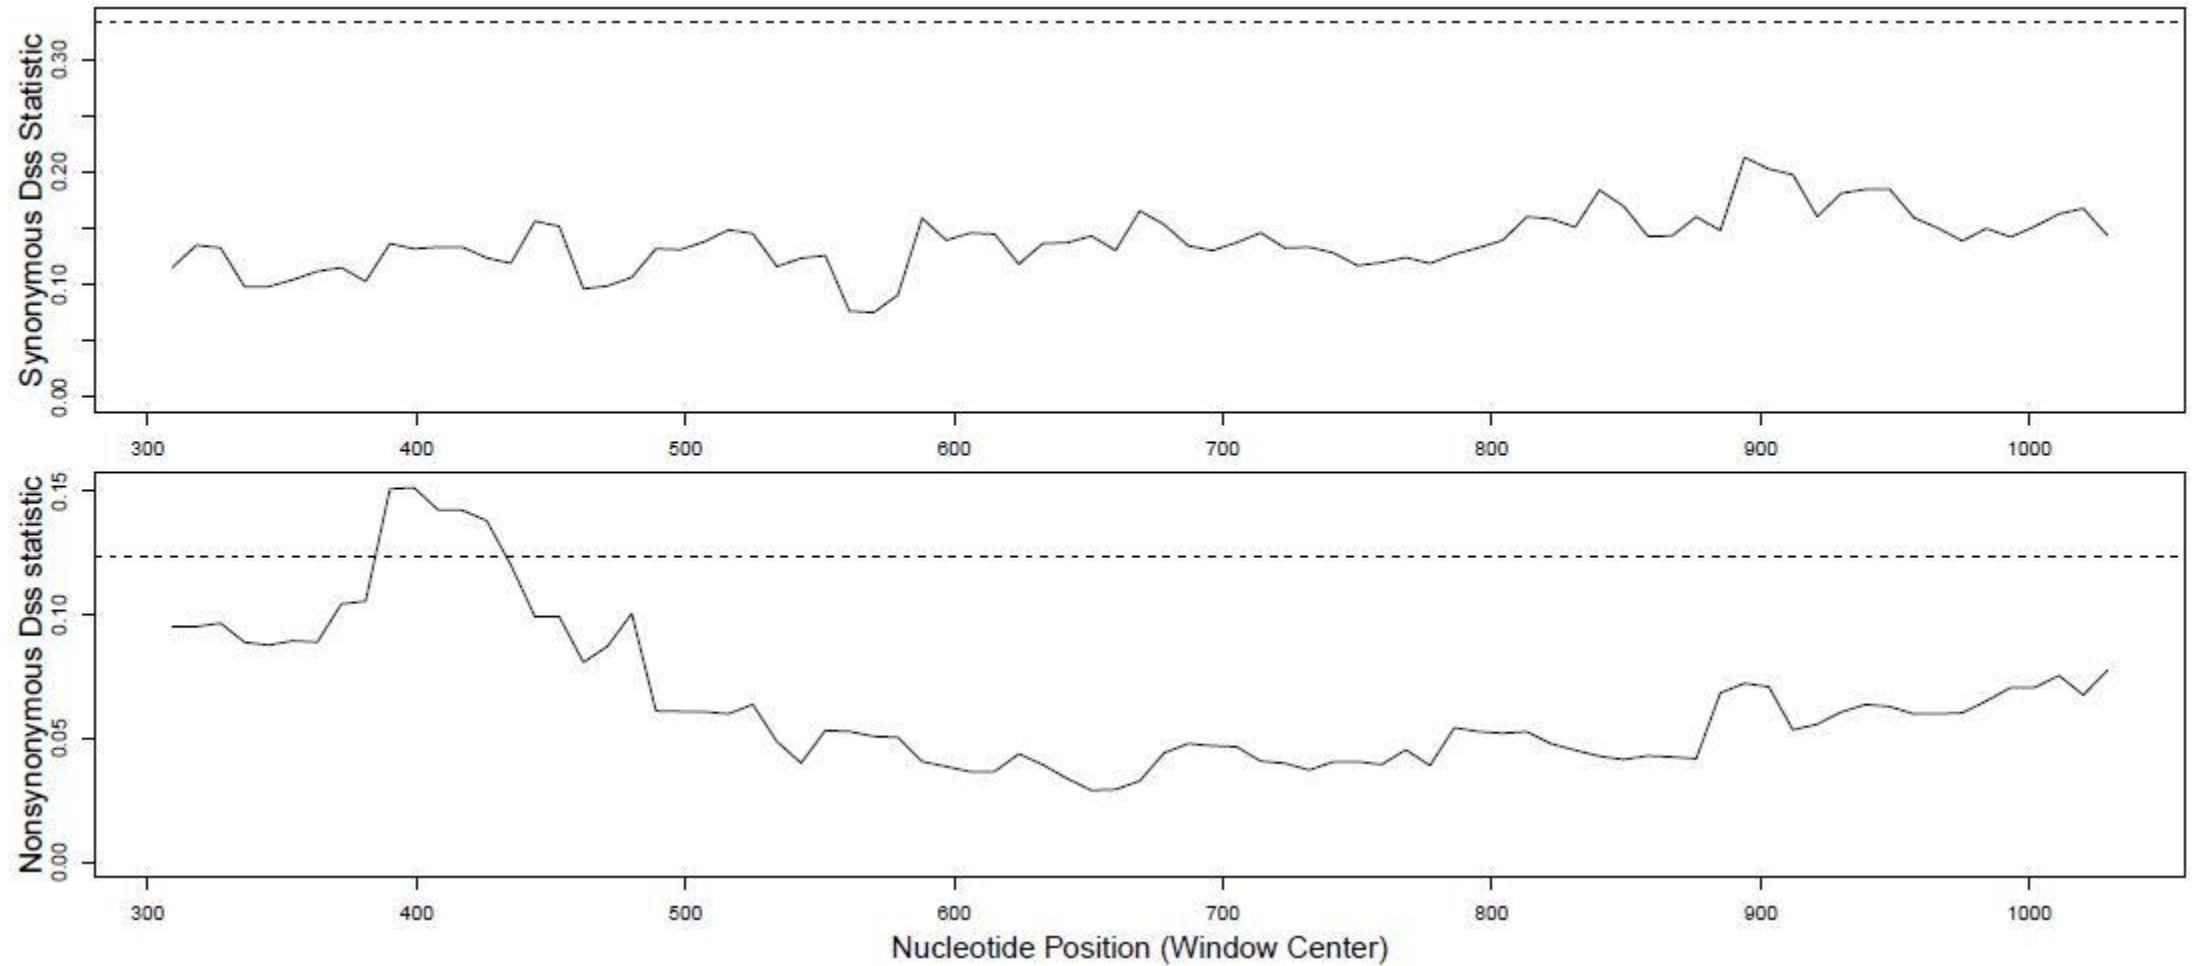

Dss statistic landscapes for synonymous and nonsynonymous changes. Dotted horizontal lines represent the 95% significance level for each test, from a parametric bootstrap with 500 replicates.

(B) 25 randomly selected core genes designated as **non-recombinants** by PhiPack (CONTD.)

HP\_1203

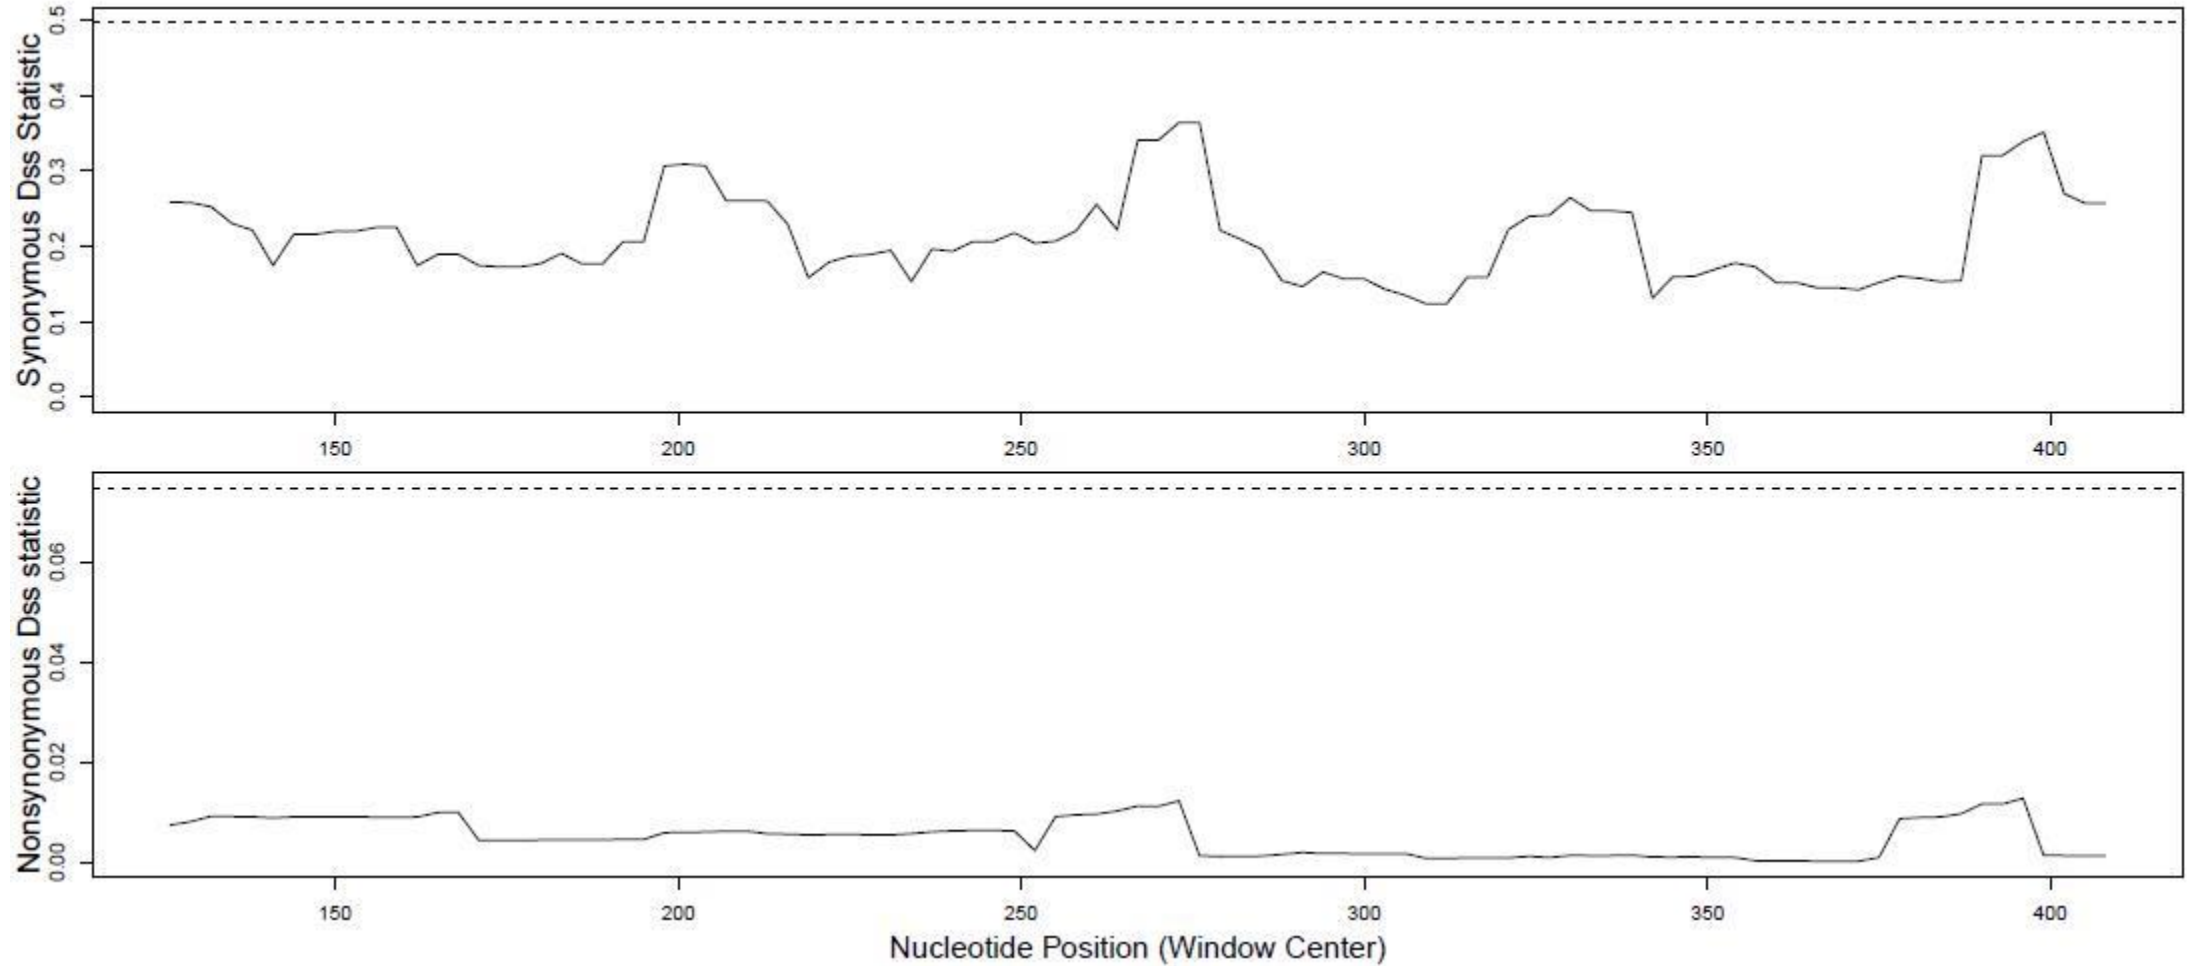

Dss statistic landscapes for synonymous and nonsynonymous changes. Dotted horizontal lines represent the 95% significance level for each test, from a parametric bootstrap with 500 replicates.

(B) 25 randomly selected core genes designated as **non-recombinants** by PhiPack (CONTD.)

HP\_1269

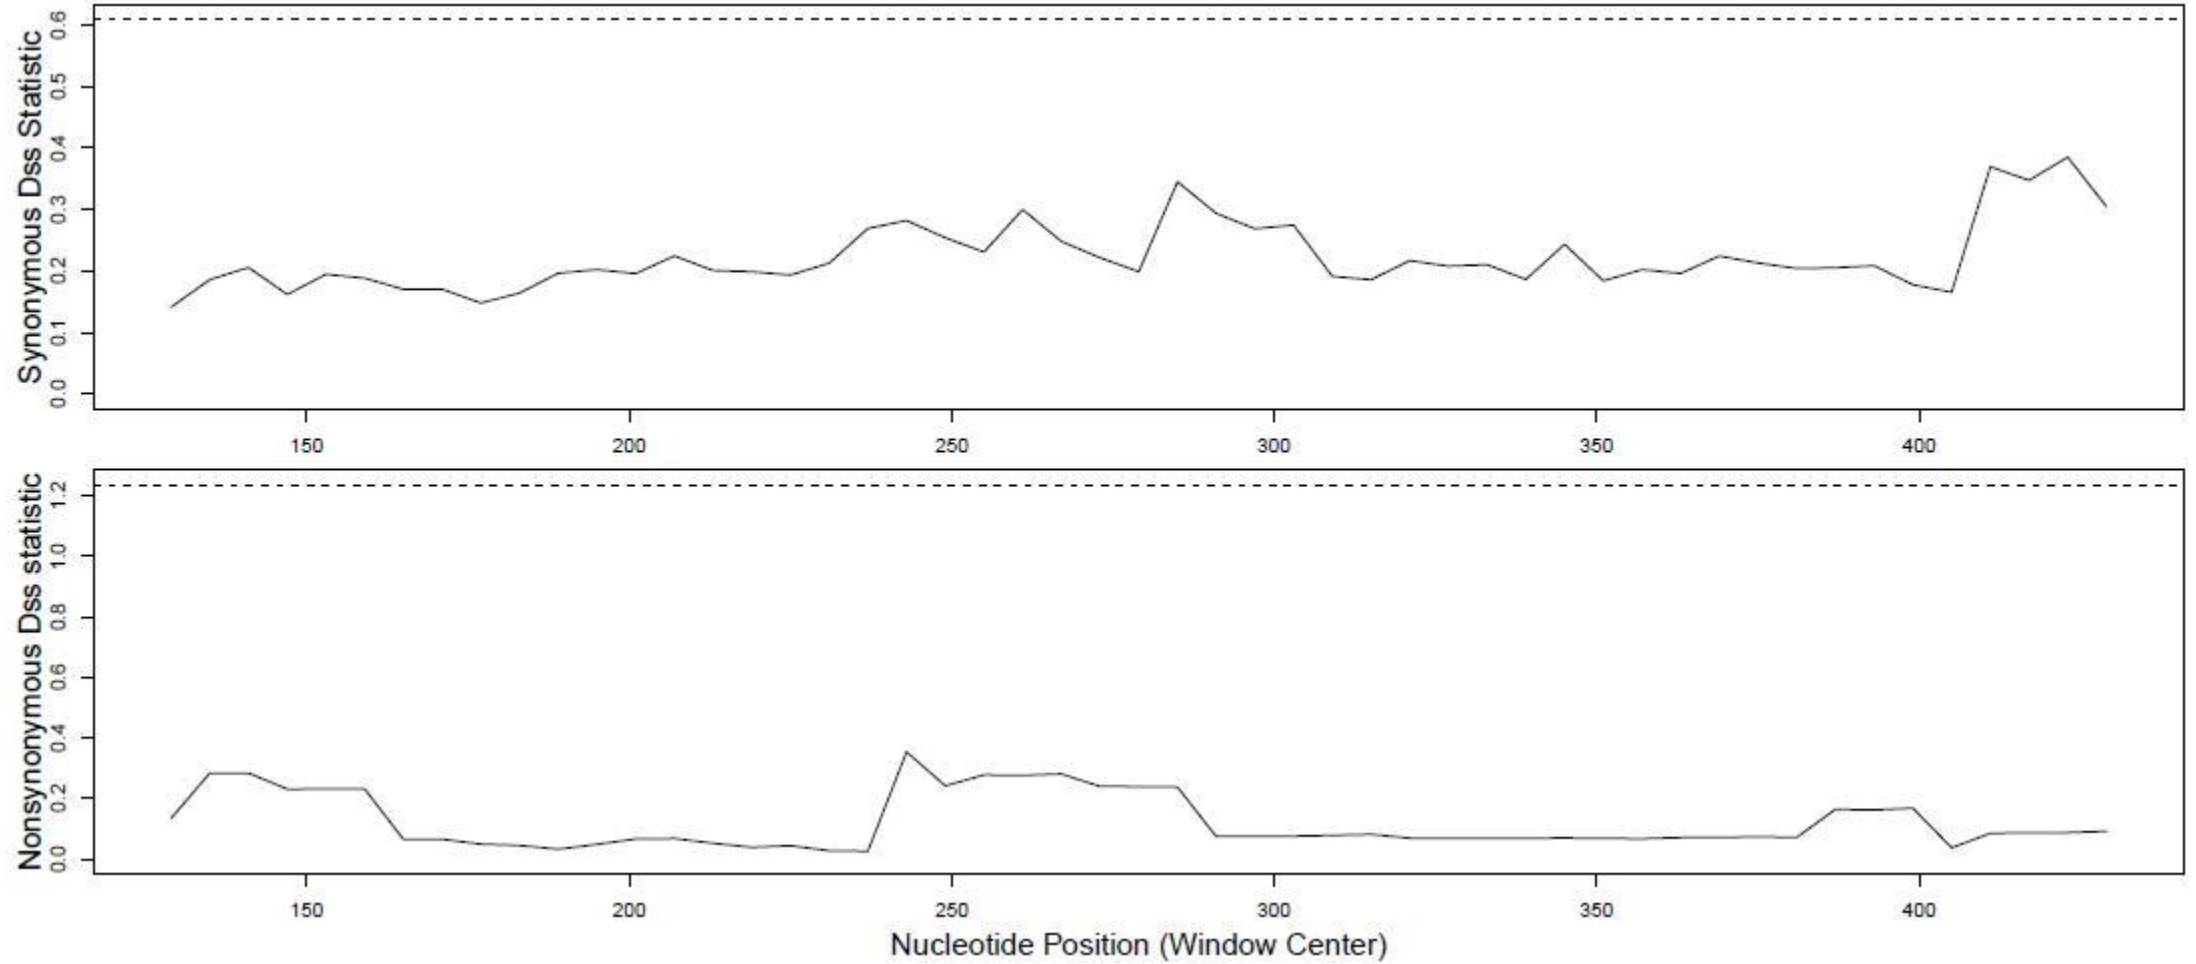

Dss statistic landscapes for synonymous and nonsynonymous changes. Dotted horizontal lines represent the 95% significance level for each test, from a parametric bootstrap with 500 replicates.



(B) 25 randomly selected core genes designated as **non-recombinants** by PhiPack (CONTD.)

HP\_1299

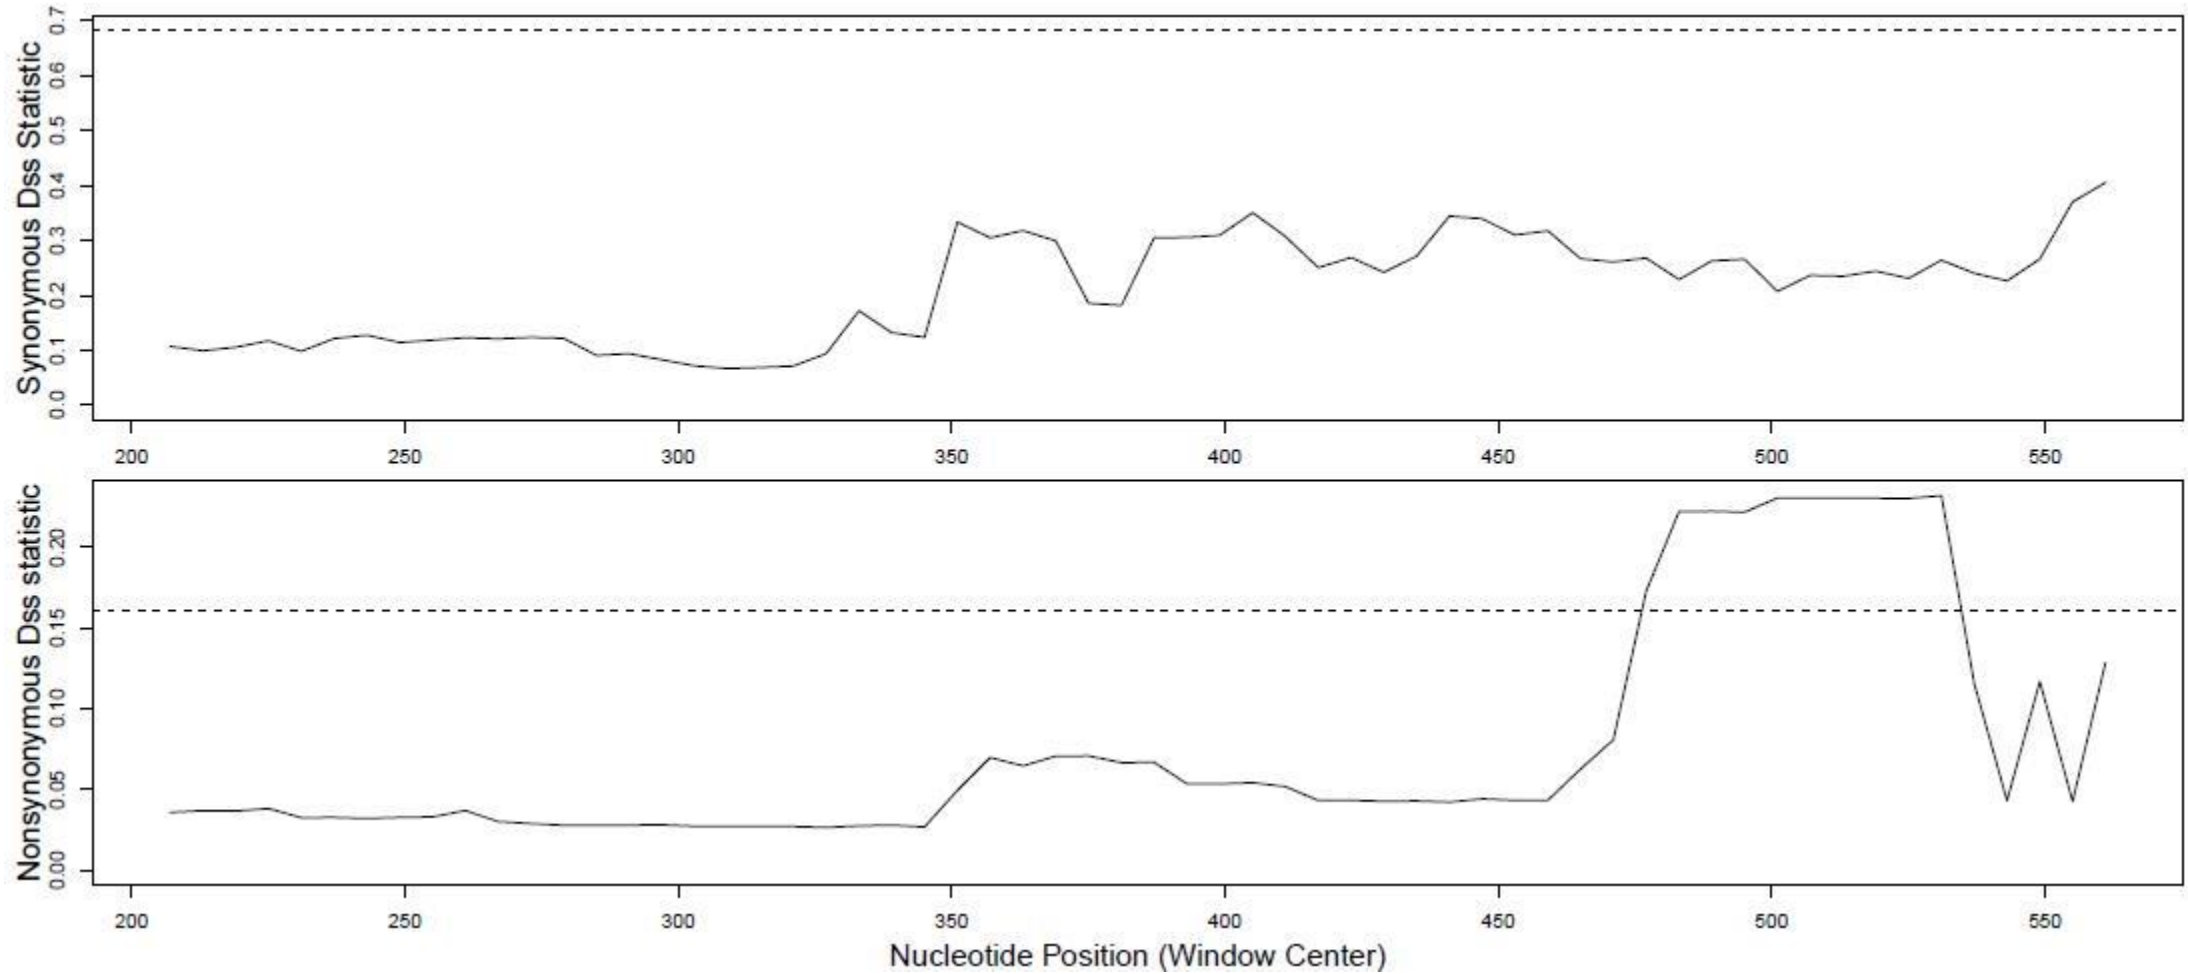

Dss statistic landscapes for synonymous and nonsynonymous changes. Dotted horizontal lines represent the 95% significance level for each test, from a parametric bootstrap with 500 replicates.

(B) 25 randomly selected core genes designated as **non-recombinants** by PhiPack (CONTD.)

HP\_1305

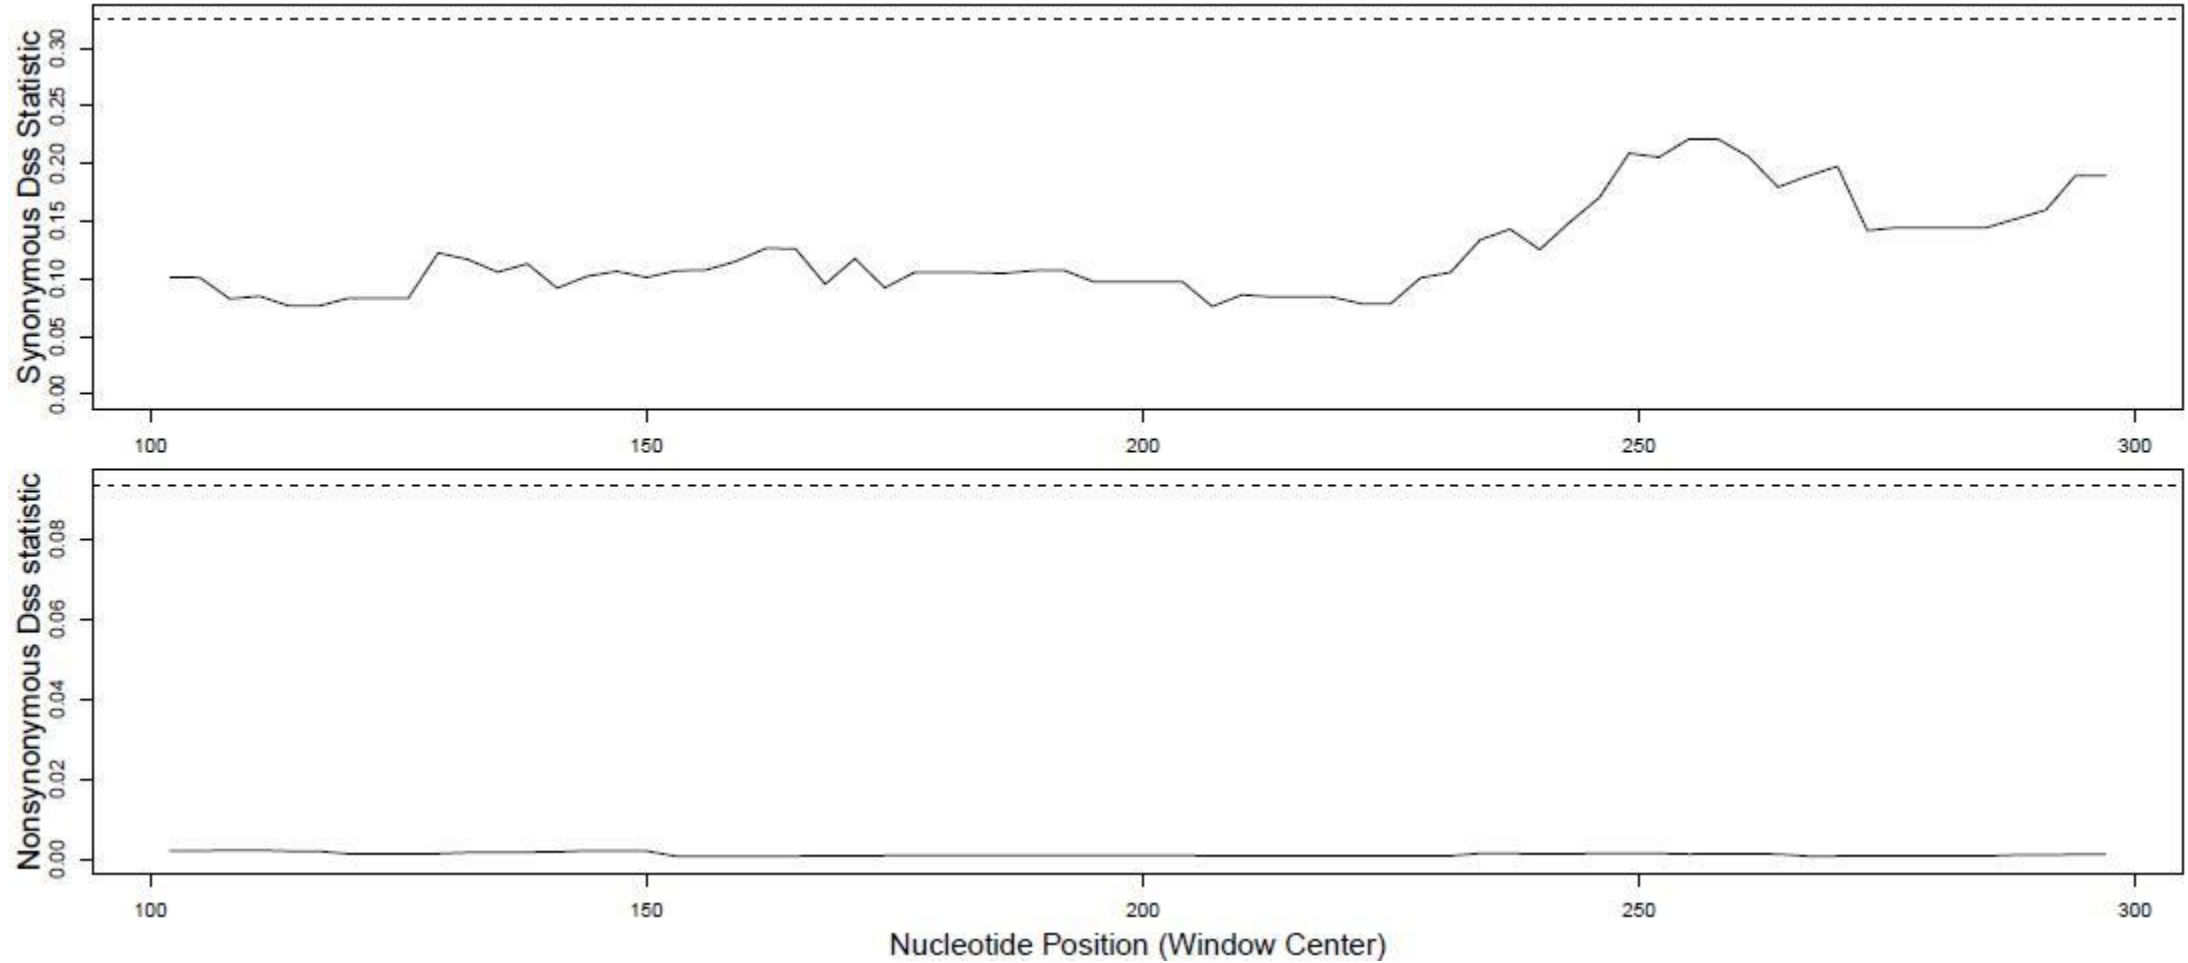

Dss statistic landscapes for synonymous and nonsynonymous changes. Dotted horizontal lines represent the 95% significance level for each test, from a parametric bootstrap with 500 replicates.

(B) 25 randomly selected core genes designated as **non-recombinants** by PhiPack (CONTD.)

HP\_1559

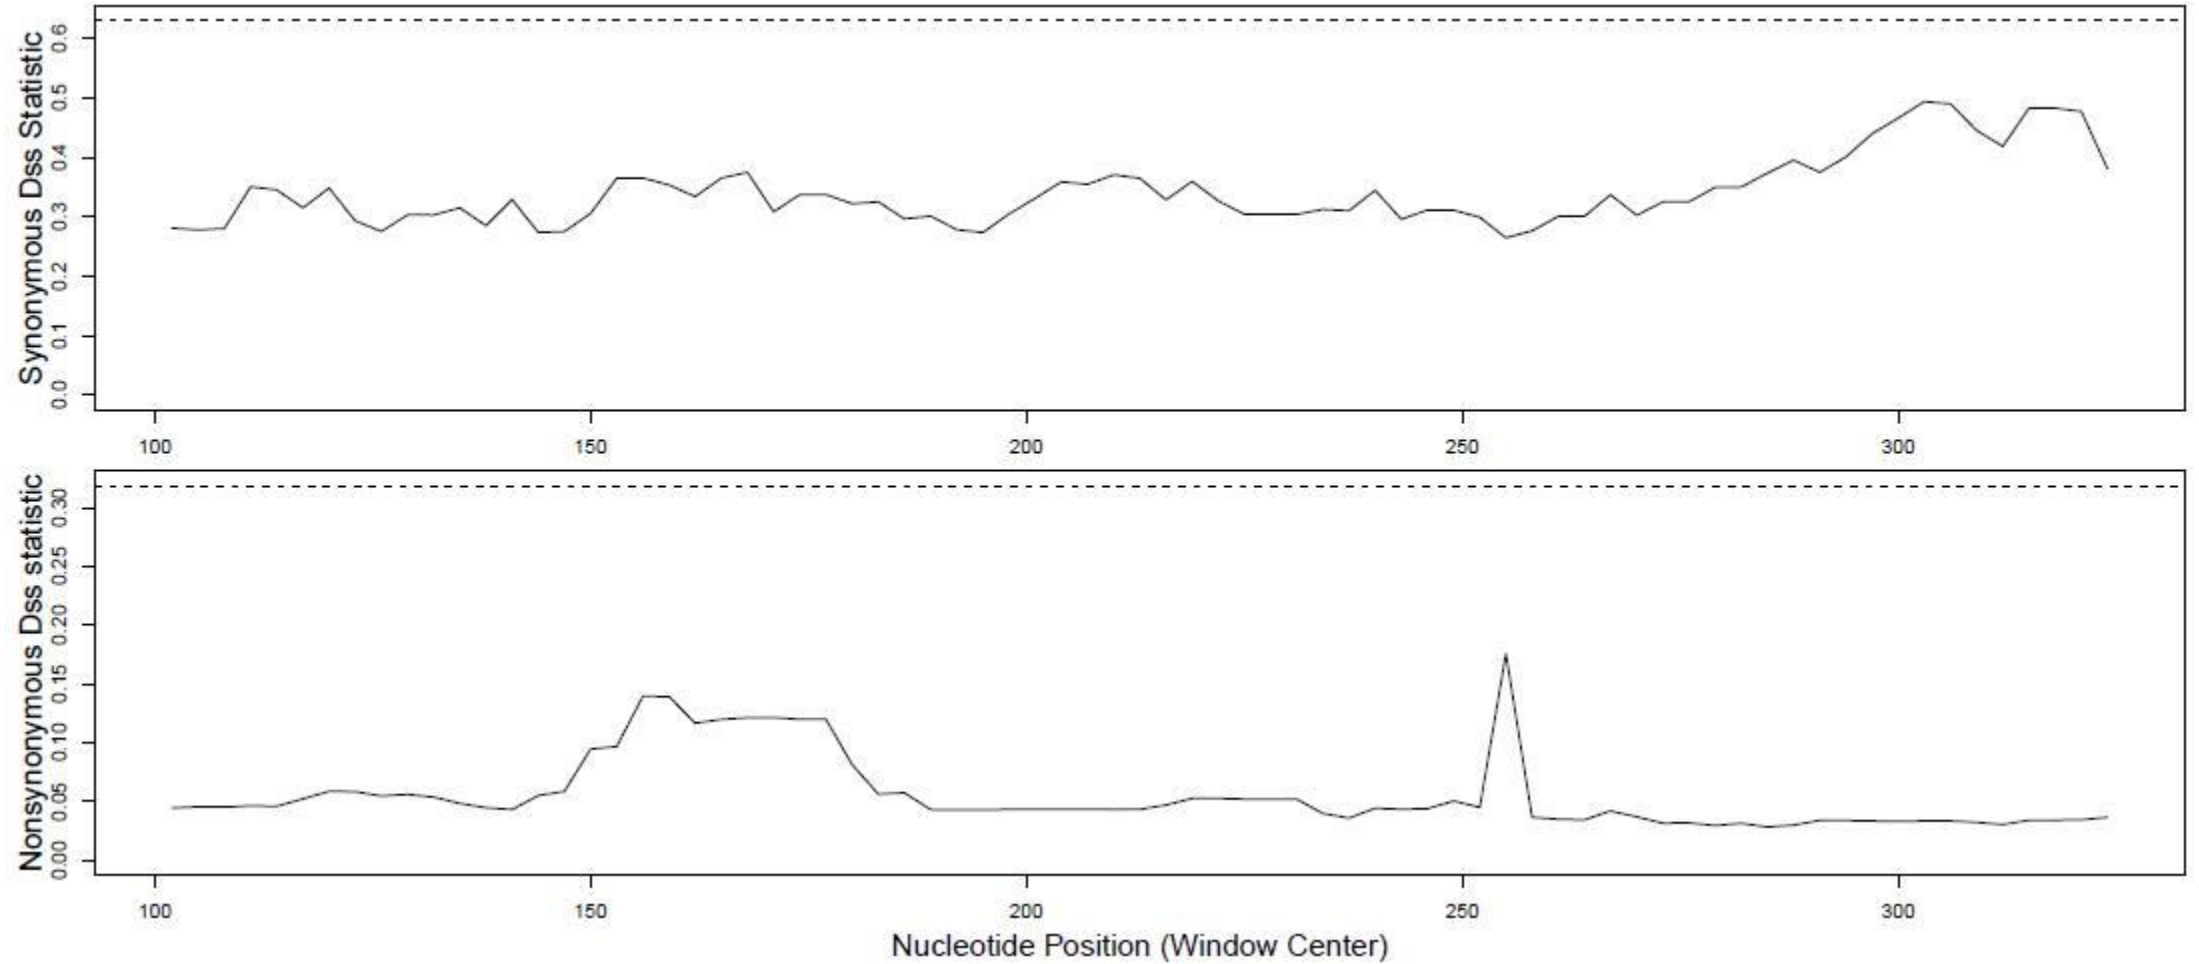

Dss statistic landscapes for synonymous and nonsynonymous changes. Dotted horizontal lines represent the 95% significance level for each test, from a parametric bootstrap with 500 replicates.

**Figure S3.** Average frequency distribution of mutations in encoded proteins of randomly selected subsets of *H. pylori* non-recombinant core genes with convergent mutations.

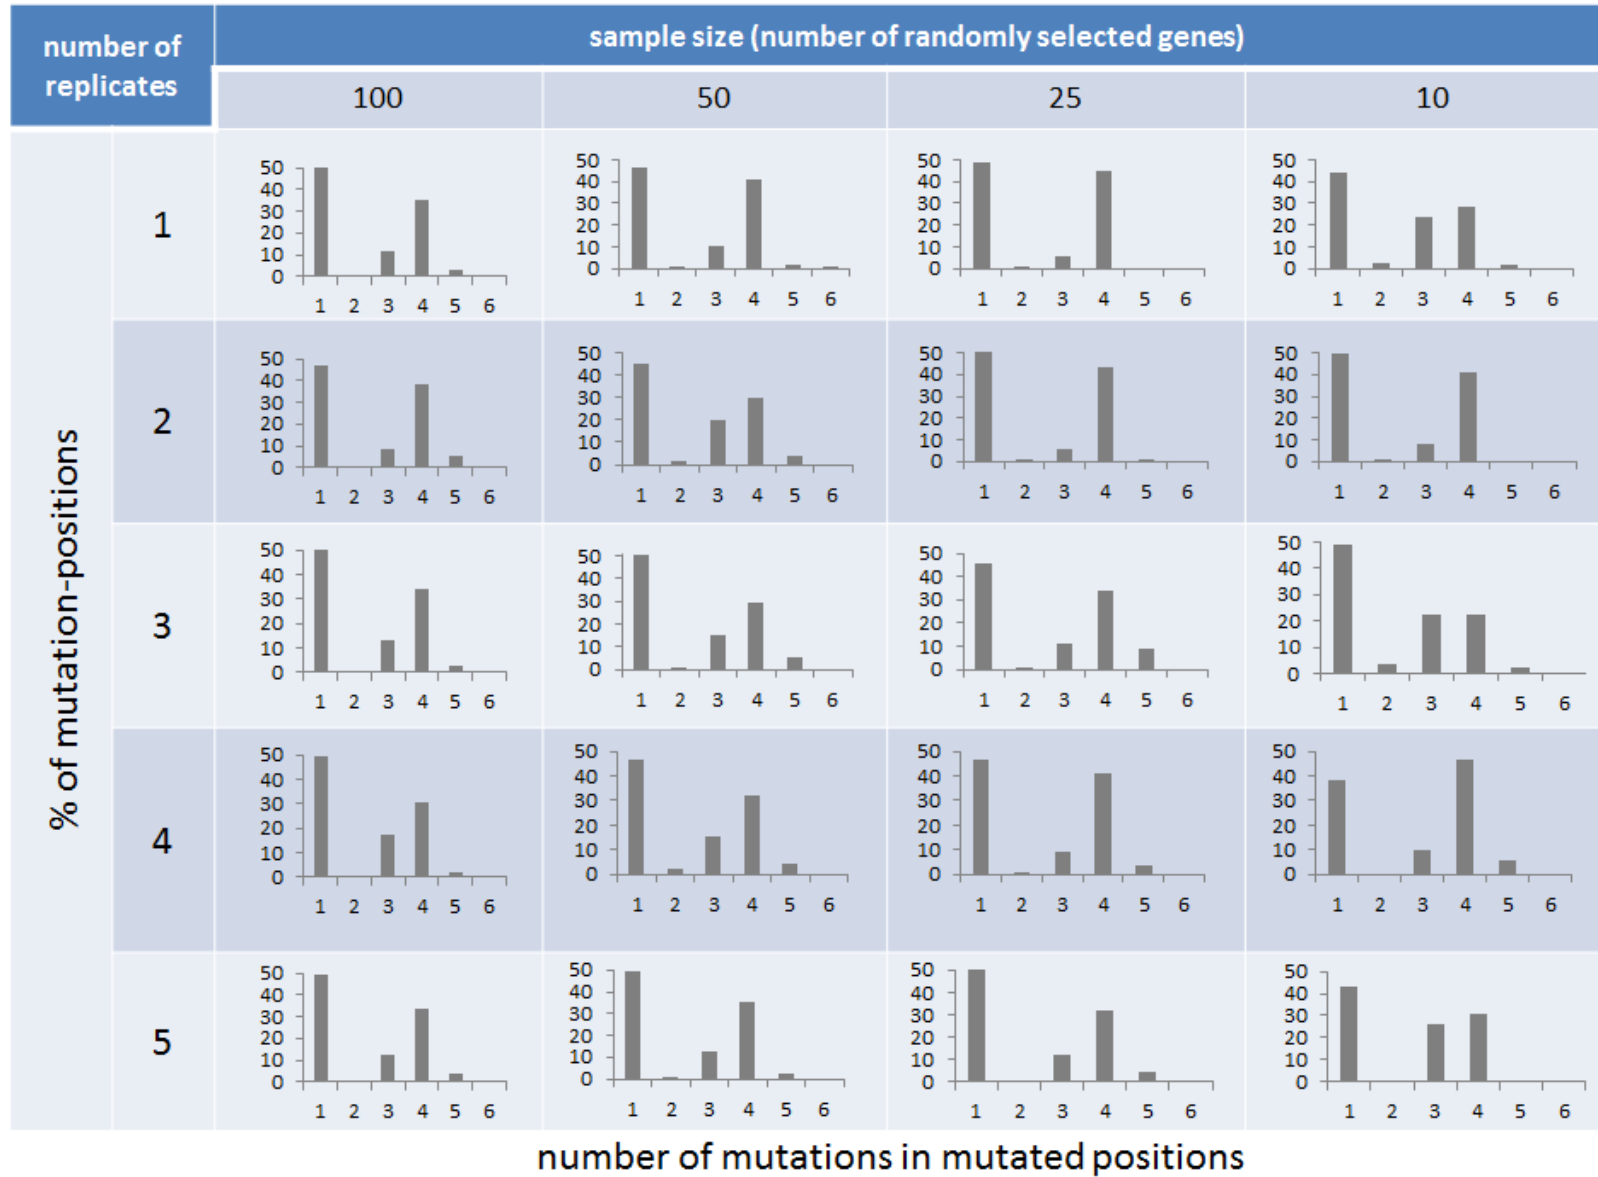

**Figure S4.** Average frequency distribution of mutations of encoded proteins in simulated datasets of 25 *H. pylori* genes (one of the randomly selected replicates from Figure S3) using two different mutation-rate constraints.

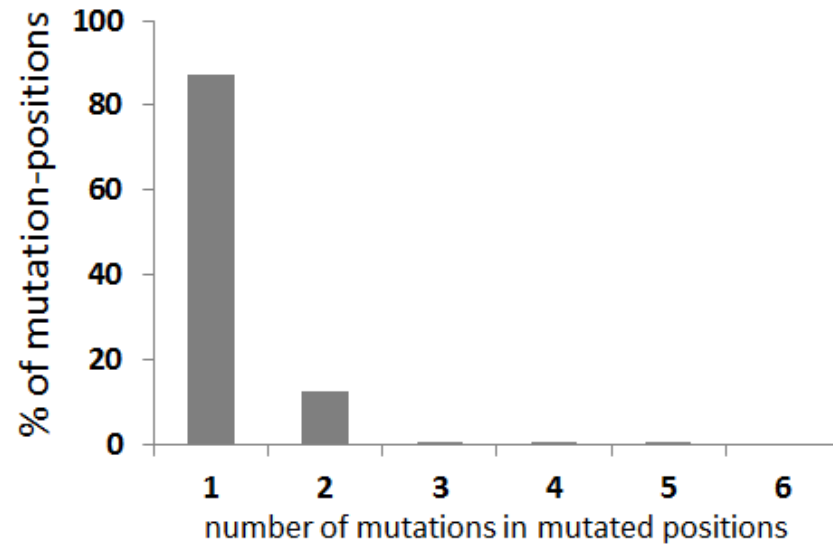

(a) Mutation rate same as of *H. pylori*

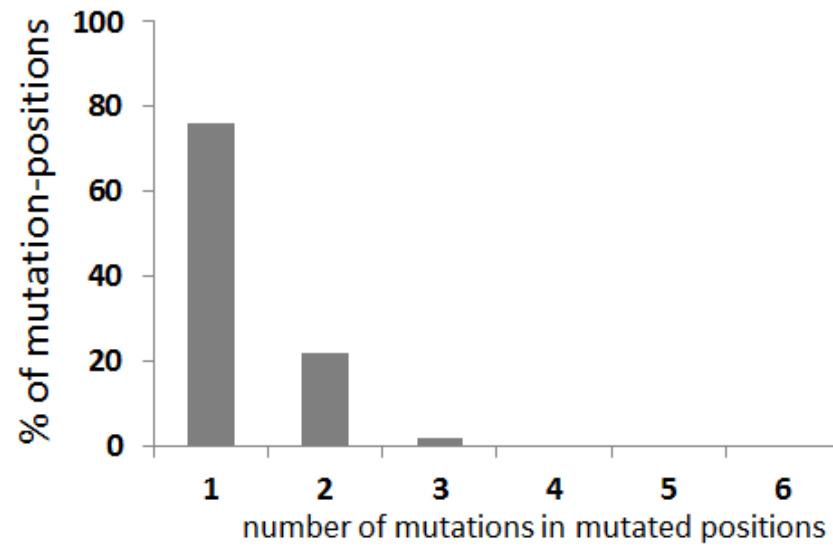

(b) Mutation rate twice of *H. pylori*
